# Supplementary material for: Analysis of variable retroduplications in human populations suggests coupling of retrotransposition to cell division
Source: HighWire-hosted journal article supplement (doi:10.1101/gr.154625.113), 2013-09-11
Supplement: Supplemental_TableS3.xlsx [file Supplemental_TableS3.xlsx]

## Sheet: For novel retroduplications
Category	ENSEMBLE id	Gene name	Populations/samples with predicted novel retroduplications	Populations with genotyped novel retroduplication	Insertion coordinate (hg19)	Count of populations
Common or fixed	ENSG00000165480	SKA3	ASW,CEU,CHB,CHS,CLM,FIN,GBR,IBS,JPT,LWK,MXL,PUR,TSI,NA12878,NA12891	ASW,CEU,CHB,CHS,CLM,FIN,GBR,IBS,JPT,LWK,MXL,PUR,TSI,YRI	chr11:108585725-108585781	14
	ENSG00000070756	PABPC1	ASW,CEU,CHB,CHS,CLM,FIN,GBR,IBS,JPT,LWK,MXL,PUR,TSI,YRI	ASW,CEU,CHB,CHS,CLM,FIN,GBR,IBS,JPT,LWK,MXL,PUR,TSI,YRI		14
	ENSG00000180228	PRKRA	ASW,CEU,CHB,CHS,CLM,FIN,GBR,IBS,JPT,LWK,MXL,PUR,TSI,YRI	ASW,CEU,CHB,CHS,CLM,FIN,GBR,IBS,JPT,LWK,MXL,PUR,TSI,YRI		14
	ENSG00000092445	TYRO3	ASW,CEU,CHB,CHS,CLM,FIN,GBR,IBS,JPT,LWK,MXL,PUR,TSI,YRI	ASW,CEU,CHB,CHS,CLM,FIN,GBR,IBS,JPT,LWK,MXL,PUR,TSI,YRI	chr13:44069805-44069823	14
	ENSG00000004897	CDC27	ASW,CEU,CHB,CHS,CLM,FIN,GBR,IBS,JPT,LWK,MXL,PUR,TSI,YRI,NA12878,NA12891	ASW,CEU,CHB,CHS,CLM,FIN,GBR,IBS,JPT,LWK,MXL,PUR,TSI,YRI		14
	ENSG00000029363	BCLAF1	ASW,CEU,CHB,CHS,CLM,FIN,GBR,IBS,JPT,LWK,MXL,PUR,TSI,YRI,NA12878,NA12891,NA12892,NA19238,NA19239,NA19240	ASW,CEU,CHB,CHS,CLM,FIN,GBR,IBS,JPT,LWK,MXL,PUR,TSI,YRI		14
	ENSG00000122565	CBX3	ASW,CEU,CHB,CHS,CLM,FIN,GBR,IBS,JPT,LWK,MXL,PUR,TSI,YRI,NA12878,NA12891,NA12892,NA19238,NA19240	ASW,CEU,CHB,CHS,CLM,FIN,GBR,IBS,JPT,LWK,MXL,PUR,TSI,YRI	chr15:40854153-40854197	14
	ENSG00000177879	AP3S1	ASW,CEU,CHB,CHS,CLM,FIN,GBR,IBS,JPT,LWK,MXL,PUR,TSI,YRI,NA12878,NA12891,NA19240	ASW,CEU,CHB,CHS,CLM,FIN,GBR,IBS,JPT,LWK,MXL,PUR,TSI,YRI		14
	ENSG00000139372	TDG	ASW,CEU,CHB,CHS,CLM,FIN,GBR,JPT,LWK,MXL,PUR,TSI,YRI,NA12878,NA19240	ASW,CEU,CHB,CHS,CLM,FIN,GBR,IBS,JPT,LWK,MXL,PUR,TSI,YRI	chr12:125801082-125801222	14
	ENSG00000148408	CACNA1B	ASW,CHS,CLM,FIN,GBR,IBS,LWK,MXL,PUR,TSI,YRI,NA12878,NA12891,NA19238,NA19239,NA19240	ASW,CEU,CHB,CHS,CLM,FIN,GBR,IBS,JPT,LWK,MXL,PUR,TSI,YRI	chr1:147499911-147500084	14
	ENSG00000202582	AC131157.1	ASW,CHS,CLM,FIN,GBR,IBS,LWK,MXL,PUR,TSI,YRI,NA12878,NA12891,NA19240	ASW,CEU,CHB,CHS,CLM,FIN,GBR,IBS,JPT,LWK,MXL,PUR,TSI,YRI		14
	ENSG00000152591	DSPP	GBR	ASW,CEU,CHB,CHS,CLM,FIN,GBR,IBS,JPT,LWK,MXL,PUR,TSI,YRI		14
	ENSG00000109919	MTCH2	ASW,CEU,CHB,CHS,FIN,GBR,JPT,LWK,MXL,PUR,TSI,YRI,NA12878,NA12891,NA12892,NA19238,NA19239,NA19240	ASW,CEU,CHB,CHS,CLM,FIN,GBR,JPT,LWK,MXL,PUR,TSI,YRI		13
	ENSG00000147274	RBMX	ASW,CEU,CHS,CLM,FIN,GBR,LWK,MXL,PUR	ASW,CEU,CHB,CHS,CLM,FIN,GBR,JPT,LWK,MXL,PUR,TSI,YRI	chr9:6727567-6727608	13
	ENSG00000004455	AK2	ASW,CHS,CLM,FIN,GBR,LWK,MXL,TSI,YRI	ASW,CEU,CHB,CHS,CLM,FIN,GBR,JPT,LWK,MXL,PUR,TSI,YRI	chr11:17535263-17535390	13
	ENSG00000143631	FLG	ASW,CHS,CLM,GBR	ASW,CEU,CHB,CHS,CLM,FIN,GBR,JPT,LWK,MXL,PUR,TSI,YRI		13
	ENSG00000226761	TAS2R46	CHS,CLM,FIN,GBR,PUR	ASW,CEU,CHB,CHS,CLM,FIN,GBR,JPT,LWK,MXL,PUR,TSI,YRI		13
	ENSG00000136231	IGF2BP3	CHS,GBR,LWK,MXL,PUR	ASW,CEU,CHB,CHS,CLM,FIN,GBR,JPT,LWK,MXL,PUR,TSI,YRI		13
	ENSG00000234412	AL590623.1	TSI,NA12891	ASW,CEU,CHB,CHS,FIN,GBR,JPT,LWK,MXL,PUR,TSI,YRI		12
	ENSG00000145919	BOD1	ASW,CLM,FIN,GBR,LWK,MXL,PUR,TSI,YRI,NA12878	ASW,CEU,CHB,CLM,FIN,GBR,IBS,LWK,MXL,PUR,TSI,YRI		12
	ENSG00000168958	MFF	ASW,CEU,CHS,CLM,FIN,GBR,JPT,LWK,MXL,PUR,TSI,YRI,NA19238	ASW,CEU,CHS,CLM,FIN,GBR,JPT,LWK,MXL,PUR,TSI,YRI	chr15:93839674-93839703	12
Population specific or rare	ENSG00000168214	RBPJ	CHS,FIN,GBR	ASW,CEU,CHS,CLM,FIN,GBR,IBS,JPT,LWK,PUR		10
	ENSG00000115539	PDCL3	CHS,FIN,GBR,MXL,PUR	CEU,CHB,CHS,CLM,FIN,GBR,JPT,MXL,PUR,TSI	chr2:179930004-179930210	10
	ENSG00000179195	ZNF664	ASW,FIN,GBR,MXL,PUR,TSI,YRI	ASW,CEU,CLM,FIN,GBR,MXL,PUR,TSI,YRI	chr2:3931606-3931651	9
	ENSG00000149531	FRG1B	ASW,CEU,CLM,GBR,MXL,PUR,TSI,YRI	ASW,CEU,CLM,GBR,LWK,MXL,PUR,TSI,YRI		9
	ENSG00000101266	CSNK2A1	CHS,FIN,GBR	CEU,CHB,CHS,FIN,GBR,JPT,LWK,TSI,YRI	chr11:11374361-11374566	9
	ENSG00000077380	DYNC1I2	CHS,GBR,JPT,LWK	CEU,CHB,CHS,FIN,GBR,JPT,LWK,TSI,YRI		9
	ENSG00000015479	MATR3	ASW,CEU,FIN,GBR,IBS,MXL,TSI	ASW,CEU,CLM,FIN,GBR,IBS,MXL,TSI	chr12:113886981-113887006	8
	ENSG00000173674	EIF1AX	CHS	ASW,CEU,CHB,CHS,GBR,JPT,LWK		7
	ENSG00000238159	AL583842.1	NA19238	CEU,CHS,FIN,GBR,JPT,TSI,YRI		7
	ENSG00000111640	GAPDH	CHB,CHS,JPT,MXL,PUR	CHB,CHS,FIN,JPT,MXL,PUR,TSI	chr5:56485948-56485977	7
	ENSG00000166377	ATP9B	ASW,CLM,LWK,MXL,PUR,YRI,NA19238	ASW,CLM,LWK,MXL,PUR,YRI	chr11:55372800-55372871	6
	ENSG00000119335	SET	FIN	CEU,CLM,FIN,GBR,MXL,TSI		6
	ENSG00000104341	LAPTM4B	CEU,CLM,FIN,GBR,PUR,TSI,NA12891	CEU,CLM,FIN,GBR,PUR,TSI	chr6:167333900-167333950	6
	ENSG00000118564	FBXL5	ASW,CLM,LWK,YRI	ASW,CLM,JPT,LWK,YRI	chr13:40620238-40620258	5
	ENSG00000239704	CDRT4	MXL	CEU,CHB,CHS,JPT,YRI		5
	ENSG00000175106	FAM18B2	MXL	CEU,CHB,CHS,JPT,YRI		5
	ENSG00000087053	MTMR2	CEU,CLM,FIN,GBR,TSI	CEU,CLM,FIN,GBR,TSI	chr13:47294623-47294828	5
	ENSG00000133872	TMEM66	CEU,FIN,GBR,PUR,NA12891	CEU,FIN,GBR,PUR,TSI	chr1:191798663-191798721	5
	ENSG00000130255	RPL36	GBR,MXL	CEU,GBR,MXL,PUR,TSI		5
	ENSG00000088256	GNA11	CLM,LWK,TSI,YRI	CLM,LWK,PUR,TSI,YRI		5
	ENSG00000102978	POLR2C	ASW,CLM,LWK,YRI	ASW,CLM,LWK,YRI	chr2:11405209-11405266	4
	ENSG00000234603	AC068481.2	LWK	ASW,LWK,MXL,TSI		4
	ENSG00000101166	SLMO2	ASW,LWK,MXL,YRI	ASW,LWK,MXL,YRI	chr3:8868992-8869081	4
	ENSG00000171204	TMEM126B	ASW,LWK,PUR,YRI	ASW,LWK,PUR,YRI	chrX:121150758-121150783 chr10:12256078-12256172	4
	ENSG00000168028	RPSA	GBR	CEU,GBR,JPT,LWK		4
	ENSG00000167522	ANKRD11	GBR	CHB,CHS,CLM,GBR		4
	ENSG00000111615	KRR1	CHB,CHS,CLM,JPT	CHB,CHS,CLM,JPT	chr10:23199398-23199457	4
	ENSG00000157216	SSBP3	CLM	CHS,CLM,LWK,TSI		4
	ENSG00000172809	RPL38	CEU,CHS	ASW,CEU,CHS		3
	ENSG00000106366	SERPINE1	CEU	ASW,CEU,JPT		3
	ENSG00000149100	EIF3M	ASW,LWK,YRI	ASW,LWK,YRI		3
	ENSG00000118600	TMEM5	LWK,NA19238	ASW,LWK,YRI	chr12:43686933-43687078	3
	ENSG00000149273	RPS3	CHS	CEU,CHS,GBR		3
	ENSG00000125730	C3	CEU,JPT	CEU,CHS,JPT		3
	ENSG00000075624	ACTB	GBR	CEU,FIN,GBR		3
	ENSG00000107438	PDLIM1	CEU	CEU,FIN,TSI		3
	ENSG00000048028	USP28	LWK,YRI	CEU,LWK,YRI		3
	ENSG00000141568	FOXK2	CHB,CHS,JPT	CHB,CHS,JPT		3
	ENSG00000052723	SIKE1	CHB,CHS,JPT	CHB,CHS,JPT		3
	ENSG00000102317	RBM3	CHB	CHB,GBR,TSI	chr2:222926579-222926650	3
	ENSG00000101220	C20orf27	CLM,TSI	CLM,LWK,TSI	chr16:22153457-22153620	3
	ENSG00000111670	GNPTAB	ASW	ASW,YRI		2
	ENSG00000090054	SPTLC1	ASW,YRI	ASW,YRI		2
	ENSG00000104408	EIF3E	YRI	ASW,YRI		2
	ENSG00000138668	HNRNPD	FIN	CEU,FIN		2
	ENSG00000129351	ILF3	FIN	CEU,FIN		2
	ENSG00000141646	SMAD4	FIN	CEU,FIN	chr9:127732621-127732697	2
	ENSG00000084207	GSTP1	GBR	CEU,GBR		2
	ENSG00000100345	MYH9	GBR	CEU,GBR		2
	ENSG00000150867	PIP4K2A	GBR	CEU,GBR		2
	ENSG00000186298	PPP1CC	GBR	CEU,GBR		2
	ENSG00000115414	FN1	CEU	CEU,JPT		2
	ENSG00000148346	LCN2	CEU	CEU,JPT		2
	ENSG00000114416	FXR1	JPT	CEU,JPT		2
	ENSG00000204628	GNB2L1	CEU	CEU,TSI		2
	ENSG00000104613	INTS10	CHB,CHS	CHB,CHS	chr3:129510393-129510421	2
	ENSG00000066027	PPP2R5A	CLM	CHS,CLM		2
	ENSG00000165732	DDX21	CHS	CHS,FIN	chr8:97983417-97983606	2
	ENSG00000160877	NACC1	CHS,JPT	CHS,JPT	chr3:195806775-195806928	2
	ENSG00000005884	ITGA3	JPT	CHS,JPT		2
	ENSG00000120438	TCP1	LWK	CHS,LWK		2
	ENSG00000127184	COX7C	CHS	CHS,YRI		2
	ENSG00000009307	CSDE1	GBR	FIN,GBR		2
	ENSG00000108107	RPL28	FIN	FIN,JPT		2
	ENSG00000131732	ZCCHC9	MXL	JPT,MXL	chr16:81112400-81112663	2
	ENSG00000132603	NIP7	LWK	LWK,PUR		2
	ENSG00000205358	MT1H	LWK	LWK,YRI	chr7:7943875-7943991	2
	ENSG00000071082	RPL31	LWK	LWK,YRI		2
	ENSG00000124562	SNRPC	ASW	ASW	chr6:14362552-14362644	1
	ENSG00000181789	COPG	CEU	CEU		1
	ENSG00000196576	PLXNB2	CEU	CEU		1
	ENSG00000135919	SERPINE2	CEU	CEU		1
	ENSG00000134287	ARF3	CHB	CHB	chr17:55039267-55039426	1
	ENSG00000213995	CARKD	CHB	CHB		1
	ENSG00000023228	NDUFS1	CHB	CHB		1
	ENSG00000167721	TSR1	CHB	CHB		1
	ENSG00000163631	ALB	CHS	CHS		1
	ENSG00000140157	NIPA2	CHS	CHS		1
	ENSG00000042317	SPATA7	CHS	CHS		1
	ENSG00000121741	ZMYM2	CHS	CHS		1
	ENSG00000197249	SERPINA1	CLM	CLM		1
	ENSG00000169139	UBE2V2	CLM	CLM		1
	ENSG00000121031	AC103686.1	FIN	FIN		1
	ENSG00000110955	ATP5B	FIN	FIN		1
	ENSG00000198668	CALM1	FIN	FIN		1
	ENSG00000160014	CALM3	FIN	FIN		1
	ENSG00000179218	CALR	FIN	FIN		1
	ENSG00000196776	CD47	FIN	FIN		1
	ENSG00000121053	EPX	FIN	FIN		1
	ENSG00000139641	ESYT1	FIN	FIN		1
	ENSG00000169710	FASN	FIN	FIN		1
	ENSG00000145494	NDUFS6	FIN	FIN		1
	ENSG00000115761	NOL10	FIN	FIN		1
	ENSG00000143870	PDIA6	FIN	FIN		1
	ENSG00000106628	POLD2	FIN	FIN		1
	ENSG00000166794	PPIB	FIN	FIN		1
	ENSG00000173692	PSMD1	FIN	FIN		1
	ENSG00000168066	SF1	FIN	FIN		1
	ENSG00000137801	THBS1	FIN	FIN		1
	ENSG00000151116	UEVLD	FIN	FIN		1
	ENSG00000079246	XRCC5	FIN	FIN		1
	ENSG00000197020	ZNF100	FIN	FIN		1
	ENSG00000239900	ADSL	GBR	GBR		1
	ENSG00000065361	ERBB3	GBR	GBR		1
	ENSG00000142347	MYO1F	GBR	GBR		1
	ENSG00000128340	RAC2	GBR	GBR		1
	ENSG00000150459	SAP18	GBR	GBR		1
	ENSG00000125731	SH2D3A	GBR	GBR		1
	ENSG00000154447	SH3RF1	GBR	GBR		1
	ENSG00000136527	TRA2B	GBR	GBR		1
	ENSG00000110200	C11orf51	JPT	JPT	chr3:128829369-128829514	1
	ENSG00000051523	CYBA	JPT	JPT		1
	ENSG00000135862	LAMC1	JPT	JPT		1
	ENSG00000222046	DCDC2B	LWK	LWK		1
	ENSG00000149547	EI24	LWK	LWK		1
	ENSG00000150787	PTS	LWK	LWK		1
	ENSG00000160188	RSPH1	LWK	LWK		1
	ENSG00000185305	ARL15	MXL	MXL	chr1:246150186-246150335	1
	ENSG00000130413	STK33	MXL	MXL		1
	ENSG00000116001	TIA1	MXL	MXL		1
	ENSG00000113013	HSPA9	PUR	PUR		1
	ENSG00000100030	MAPK1	PUR	PUR		1
	ENSG00000123545	NDUFAF4	PUR	PUR	chr6:156592139-156592460	1
	ENSG00000163877	SNIP1	PUR	PUR		1
	ENSG00000156467	UQCRB	PUR	PUR		1
	ENSG00000162869	KLRAQ1	YRI	YRI		1

## Sheet: Additional with 6 JPT samples
ENSEMBLE id	Gene name	Populations with predicted novel retroduplication	Populations with genotyped novel retroduplication	Insertion coordinate (hg19)	Count of populations
ENSG00000133226	SRRM1	JPT	ASW,CEU,CHB,CHS,CLM,FIN,GBR,JPT,LWK,MXL,PUR,TSI,YRI		13
ENSG00000145113	MUC4	JPT	CEU,CHB,CHS,FIN,GBR,JPT,LWK,MXL		8
ENSG00000149091	DGKZ	JPT	CEU,CHS,CLM,FIN,GBR,JPT,LWK,TSI		8
ENSG00000156482	RPL30	JPT	CEU,FIN,JPT,LWK,TSI,YRI		6
ENSG00000215504	AC090772.1	JPT	CEU,CHB,JPT,TSI,YRI		5
ENSG00000185624	P4HB	JPT	CEU,CHS,FIN,JPT		4
ENSG00000034510	TMSB10	JPT	CEU,FIN,GBR,JPT		4
ENSG00000126777	KTN1	JPT	CEU,FIN,JPT,YRI		4
ENSG00000137154	RPS6	JPT	CHS,CLM,FIN,JPT		4
ENSG00000149925	ALDOA	JPT	CEU,CHS,JPT		3
ENSG00000241685	ARPC1A	JPT	CEU,CHS,JPT		3
ENSG00000130429	ARPC1B	JPT	CEU,CHS,JPT		3
ENSG00000074800	ENO1	JPT	CEU,CHS,JPT		3
ENSG00000196924	FLNA	JPT	CEU,CHS,JPT		3
ENSG00000167658	EEF2	JPT	CEU,FIN,JPT		3
ENSG00000087460	GNAS	JPT	CEU,FIN,JPT		3
ENSG00000134333	LDHA	JPT	CEU,FIN,JPT		3
ENSG00000063177	RPL18	JPT	CEU,FIN,JPT		3
ENSG00000163468	CCT3	JPT	CEU,GBR,JPT		3
ENSG00000026025	VIM	JPT	CEU,GBR,JPT		3
ENSG00000115677	HDLBP	JPT	CEU,JPT,TSI		3
ENSG00000197956	S100A6	JPT	CEU,JPT,TSI		3
ENSG00000163466	ARPC2	JPT	CEU,JPT		2
ENSG00000164733	CTSB	JPT	CEU,JPT		2
ENSG00000110321	EIF4G2	JPT	CEU,JPT		2
ENSG00000136830	FAM129B	JPT	CEU,JPT		2
ENSG00000135677	GNS	JPT	CEU,JPT		2
ENSG00000030582	GRN	JPT	CEU,JPT		2
ENSG00000067057	PFKP	JPT	CEU,JPT		2
ENSG00000155366	RHOC	JPT	CEU,JPT		2
ENSG00000142676	RPL11	JPT	CEU,JPT		2
ENSG00000197747	S100A10	JPT	CEU,JPT		2
ENSG00000113140	SPARC	JPT	CEU,JPT		2
ENSG00000120708	TGFBI	JPT	CEU,JPT		2
ENSG00000088930	XRN2	JPT	CEU,JPT		2
ENSG00000173801	JUP	JPT	CHB,JPT		2
ENSG00000140416	TPM1	JPT	CHB,JPT		2
ENSG00000111642	CHD4	JPT	CHS,JPT		2
ENSG00000137106	GRHPR	JPT	CHS,JPT		2
ENSG00000136156	ITM2B	JPT	CHS,JPT		2
ENSG00000213741	RPS29	JPT	CHS,JPT		2
ENSG00000091164	TXNL1	JPT	CHS,JPT		2
ENSG00000167468	GPX4	JPT	CLM,JPT		2
ENSG00000126432	PRDX5	JPT	CLM,JPT		2
ENSG00000125844	RRBP1	JPT	CLM,JPT		2
ENSG00000075711	DLG1	JPT	FIN,JPT		2
ENSG00000150093	ITGB1	JPT	FIN,JPT		2
ENSG00000146083	RNF44	JPT	FIN,JPT		2
ENSG00000177600	RPLP2	JPT	FIN,JPT		2
ENSG00000125835	SNRPB	JPT	FIN,JPT		2
ENSG00000105963	ADAP1	JPT	GBR,JPT		2
ENSG00000130175	PRKCSH	JPT	GBR,JPT		2
ENSG00000197746	PSAP	JPT	GBR,JPT		2
ENSG00000077147	TM9SF3	JPT	GBR,JPT		2
ENSG00000108561	C1QBP	JPT	JPT,YRI		2
ENSG00000131473	ACLY	JPT	JPT		1
ENSG00000122729	ACO1	JPT	JPT		1
ENSG00000068366	ACSL4	JPT	JPT		1
ENSG00000184009	ACTG1	JPT	JPT		1
ENSG00000130402	ACTN4	JPT	JPT		1
ENSG00000168710	AHCYL1	JPT	JPT		1
ENSG00000085662	AKR1B1	JPT	JPT		1
ENSG00000105221	AKT2	JPT	JPT		1
ENSG00000059573	ALDH18A1	JPT	JPT		1
ENSG00000165092	ALDH1A1	JPT	JPT		1
ENSG00000122359	ANXA11	JPT	JPT		1
ENSG00000196975	ANXA4	JPT	JPT		1
ENSG00000164111	ANXA5	JPT	JPT		1
ENSG00000138279	ANXA7	JPT	JPT		1
ENSG00000161203	AP2M1	JPT	JPT		1
ENSG00000100342	APOL1	JPT	JPT		1
ENSG00000143761	ARF1	JPT	JPT		1
ENSG00000154518	ATP5G3	JPT	JPT		1
ENSG00000185825	BCAP31	JPT	JPT		1
ENSG00000136717	BIN1	JPT	JPT		1
ENSG00000103005	C16orf57	JPT	JPT		1
ENSG00000167644	C19orf33	JPT	JPT		1
ENSG00000243449	C4orf48	JPT	JPT		1
ENSG00000196642	C9orf86	JPT	JPT		1
ENSG00000122786	CALD1	JPT	JPT		1
ENSG00000127022	CANX	JPT	JPT		1
ENSG00000042493	CAPG	JPT	JPT		1
ENSG00000162909	CAPN2	JPT	JPT		1
ENSG00000126247	CAPNS1	JPT	JPT		1
ENSG00000115484	CCT4	JPT	JPT		1
ENSG00000135624	CCT7	JPT	JPT		1
ENSG00000085063	CD59	JPT	JPT		1
ENSG00000135404	CD63	JPT	JPT		1
ENSG00000198752	CDC42BPB	JPT	JPT		1
ENSG00000103249	CLCN7	JPT	JPT		1
ENSG00000125107	CNOT1	JPT	JPT		1
ENSG00000110880	CORO1C	JPT	JPT		1
ENSG00000131143	COX4I1	JPT	JPT		1
ENSG00000170373	CST1	JPT	JPT		1
ENSG00000170369	CST2	JPT	JPT		1
ENSG00000132792	CTNNBL1	JPT	JPT		1
ENSG00000085733	CTTN	JPT	JPT		1
ENSG00000115866	DARS	JPT	JPT		1
ENSG00000167986	DDB1	JPT	JPT		1
ENSG00000141141	DDX52	JPT	JPT		1
ENSG00000105821	DNAJC2	JPT	JPT		1
ENSG00000123992	DNPEP	JPT	JPT		1
ENSG00000175550	DRAP1	JPT	JPT		1
ENSG00000113360	DROSHA	JPT	JPT		1
ENSG00000173442	EHBP1L1	JPT	JPT		1
ENSG00000173812	EIF1	JPT	JPT		1
ENSG00000086232	EIF2AK1	JPT	JPT		1
ENSG00000106263	EIF3B	JPT	JPT		1
ENSG00000147677	EIF3H	JPT	JPT		1
ENSG00000141543	EIF4A3	JPT	JPT		1
ENSG00000116016	EPAS1	JPT	JPT		1
ENSG00000113719	ERGIC1	JPT	JPT		1
ENSG00000125991	ERGIC3	JPT	JPT		1
ENSG00000179115	FARSA	JPT	JPT		1
ENSG00000135108	FBXO21	JPT	JPT		1
ENSG00000112146	FBXO9	JPT	JPT		1
ENSG00000115641	FHL2	JPT	JPT		1
ENSG00000132589	FLOT2	JPT	JPT		1
ENSG00000075420	FNDC3B	JPT	JPT		1
ENSG00000089280	FUS	JPT	JPT		1
ENSG00000089154	GCN1L1	JPT	JPT		1
ENSG00000115419	GLS	JPT	JPT		1
ENSG00000172354	GNB2	JPT	JPT		1
ENSG00000090615	GOLGA3	JPT	JPT		1
ENSG00000169727	GPS1	JPT	JPT		1
ENSG00000163754	GYG1	JPT	JPT		1
ENSG00000100644	HIF1A	JPT	JPT		1
ENSG00000214753	HNRNPUL2	JPT	JPT		1
ENSG00000166598	HSP90B1	JPT	JPT		1
ENSG00000163395	IGFN1	JPT	JPT		1
ENSG00000164880	INTS1	JPT	JPT		1
ENSG00000162434	JAK1	JPT	JPT		1
ENSG00000171988	JMJD1C	JPT	JPT		1
ENSG00000183853	KIRREL	JPT	JPT		1
ENSG00000135480	KRT7	JPT	JPT		1
ENSG00000198910	L1CAM	JPT	JPT		1
ENSG00000100097	LGALS1	JPT	JPT		1
ENSG00000123384	LRP1	JPT	JPT		1
ENSG00000146701	MDH2	JPT	JPT		1
ENSG00000109736	MFSD10	JPT	JPT		1
ENSG00000168288	MMADHC	JPT	JPT		1
ENSG00000013364	MVP	JPT	JPT		1
ENSG00000138119	MYOF	JPT	JPT		1
ENSG00000115053	NCL	JPT	JPT		1
ENSG00000129559	NEDD8	JPT	JPT		1
ENSG00000109320	NFKB1	JPT	JPT		1
ENSG00000164190	NIPBL	JPT	JPT		1
ENSG00000168256	NKIRAS2	JPT	JPT		1
ENSG00000102900	NUP93	JPT	JPT		1
ENSG00000090621	PABPC4	JPT	JPT		1
ENSG00000124299	PEPD	JPT	JPT		1
ENSG00000100029	PES1	JPT	JPT		1
ENSG00000141959	PFKL	JPT	JPT		1
ENSG00000054148	PHPT1	JPT	JPT		1
ENSG00000104368	PLAT	JPT	JPT		1
ENSG00000178209	PLEC	JPT	JPT		1
ENSG00000152952	PLOD2	JPT	JPT		1
ENSG00000164050	PLXNB1	JPT	JPT		1
ENSG00000105063	PPP6R1	JPT	JPT		1
ENSG00000067606	PRKCZ	JPT	JPT		1
ENSG00000174231	PRPF8	JPT	JPT		1
ENSG00000087191	PSMC5	JPT	JPT		1
ENSG00000104960	PTOV1	JPT	JPT		1
ENSG00000100504	PYGL	JPT	JPT		1
ENSG00000114115	RBP1	JPT	JPT		1
ENSG00000157916	RER1	JPT	JPT		1
ENSG00000255526	RP11-934B9.1	JPT	JPT		1
ENSG00000161016	RPL8	JPT	JPT		1
ENSG00000186468	RPS23	JPT	JPT		1
ENSG00000138326	RPS24	JPT	JPT		1
ENSG00000129824	RPS4Y1	JPT	JPT		1
ENSG00000175467	SART1	JPT	JPT		1
ENSG00000130066	SAT1	JPT	JPT		1
ENSG00000126461	SCAF1	JPT	JPT		1
ENSG00000073578	SDHA	JPT	JPT		1
ENSG00000168528	SERINC2	JPT	JPT		1
ENSG00000075415	SLC25A3	JPT	JPT		1
ENSG00000139613	SMARCC2	JPT	JPT		1
ENSG00000108055	SMC3	JPT	JPT		1
ENSG00000008294	SPAG9	JPT	JPT		1
ENSG00000115306	SPTBN1	JPT	JPT		1
ENSG00000152953	STK32B	JPT	JPT		1
ENSG00000143155	TIPRL	JPT	JPT		1
ENSG00000163931	TKT	JPT	JPT		1
ENSG00000137076	TLN1	JPT	JPT		1
ENSG00000101337	TM9SF4	JPT	JPT		1
ENSG00000006327	TNFRSF12A	JPT	JPT		1
ENSG00000145901	TNIP1	JPT	JPT		1
ENSG00000025772	TOMM34	JPT	JPT		1
ENSG00000077097	TOP2B	JPT	JPT		1
ENSG00000133112	TPT1	JPT	JPT		1
ENSG00000137073	UBAP2	JPT	JPT		1
ENSG00000131508	UBE2D2	JPT	JPT		1
ENSG00000107341	UBE2R2	JPT	JPT		1
ENSG00000168883	USP39	JPT	JPT		1
ENSG00000165280	VCP	JPT	JPT		1
ENSG00000132471	WBP2	JPT	JPT		1
ENSG00000082898	XPO1	JPT	JPT		1
ENSG00000106636	YKT6	JPT	JPT		1
ENSG00000134308	YWHAQ	JPT	JPT		1
ENSG00000156599	ZDHHC5	JPT	JPT		1

## Sheet: For retrodup in the reference
ENSEMBLE id	Gene name	Retroduplication coordiantes
ENSG00000196422	KIAA0649	chr22:21695884-21699531
ENSG00000129194	SOX15	chr11:128750220-128750563
ENSG00000068078	FGFR3	chr1:247277161-247283578
ENSG00000135486	HNRNPA1	chr12:9180128-9181685
ENSG00000145425	RPS3A	chr9:6662424-6663792
ENSG00000100568	VTI1B	chr9:131413277-131414426
ENSG00000241343	RPL36A	chr11:16996240-16996560
ENSG00000122026	RPL21	chr16:9250259-9250738
ENSG00000174485	DENND4A	chr8:9311208-9314928
ENSG00000124614	RPS10	chr22:24665316-24666102
ENSG00000135535	CD164	chr10:99034769-99037854
ENSG00000197728	RPS26	chr17:43685937-43686284
ENSG00000133112	TPT1	chr2:209079448-209087349
ENSG00000141429	GALNT1	chr3:151477535-151479799
ENSG00000114062	UBE3A	chr21:32432919-32435487
ENSG00000179295	PTPN11	chr5:23303674-23305252
ENSG00000131368	MRPS25	chr12:64836290-64837110
ENSG00000254772	EEF1G	chr3:40637698-40638985
ENSG00000176244	ACBD7	chr11:3982507-3982768
ENSG00000150048	CLEC1A	chr2:223563342-223564203
ENSG00000130803	ZNF317	chr8:94658294-94659320
ENSG00000166347	CYB5A	chr2:170646603-170647395
ENSG00000065154	OAT	chrX:48271748-48274761
ENSG00000153046	CDYL	chrX:9370791-9382606
ENSG00000178234	GALNT11	chr1:66041812-66044063
ENSG00000089818	NECAP1	chr2:74577196-74578136
ENSG00000044115	CTNNA1	chr5:114725340-114728067
