# Supplementary material for: Analysis of variable retroduplications in human populations suggests coupling of retrotransposition to cell division
Source: HighWire-hosted journal article supplement (doi:10.1101/gr.154625.113), 2013-09-11
Supplement: Supplemental_TableS5.xlsx [file Supplemental_TableS5.xlsx]

## Sheet: retroduplications_from_GENCODE
ID	Chromosome	Start	End	Strand	Parent gene	Parent transcript	Parent Chromosome	Parent Start	Parent End	Parent Strand	Identity
ENST00000459808.1	chr3	136527393	136528465	-	ENSG00000198075.5	ENST00000272452.2	chr2	108994468	109004513	+	0.637518
ENST00000422550.1	chrX	103230404	103230880	+	ENSG00000123569.7	ENST00000217926.5	chrX	103265719	103268259	-	0.832285
ENST00000455804.1	chr1	115078616	115080461	+	ENSG00000067225.10	ENST00000335181.4	chr15	72491370	72523684	-	0.937623
ENST00000462177.1	chr3	181584139	181584942	-	ENSG00000155329.7	ENST00000324170.3	chr5	132332677	132362296	-	0.963265
ENST00000437852.1	chr9	116612975	116613914	-	ENSG00000071994.6	ENST00000541970.1	chr6	170884383	170893748	-	0.918085
ENST00000418672.1	chr7	14110160	14111005	-	ENSG00000157765.7	ENST00000382051.3	chr4	25657466	25680370	+	0.783688
ENST00000416129.1	chr13	41861939	41862456	-	ENSG00000128340.10	ENST00000249071.6	chr22	37621301	37640310	-	0.710425
ENST00000529327.1	chr11	58085109	58085847	-	ENSG00000172362.2	ENST00000302572.2	chr11	58206593	58207646	-	0.73613
ENST00000415445.1	chr2	87161585	87161945	-	ENSG00000065518.7	ENST00000485064.1	chr3	120315175	120321171	+	0.872576
ENST00000418303.1	chr7	43958296	43959653	+	ENSG00000131462.2	ENST00000251413.2	chr17	40761358	40767254	+	0.925626
ENST00000514691.1	chr4	130098541	130100249	+	ENSG00000151470.7	ENST00000281146.4	chr4	130014472	130034487	+	0.740351
ENST00000492018.1	chr9	45363481	45363847	+	ENSG00000167797.3	ENST00000301488.3	chr11	67273968	67276102	-	0.896458
ENST00000476476.1	chr3	152785067	152785340	+	ENSG00000198830.6	ENST00000361427.5	chr1	26799010	26802463	+	0.927007
ENST00000510539.1	chr4	49590806	49591540	+	ENSG00000178996.8	ENST00000326277.3	chr5	53813593	53816833	+	0.742857
ENST00000429207.1	chr1	17007487	17015279	-	ENSG00000178104.13	ENST00000313382.9	chr1	144851424	145040002	-	0.899329
ENST00000433403.1	chr2	178970364	178970480	+	ENSG00000126432.9	ENST00000265462.4	chr11	64085560	64089283	+	0.940171
ENST00000397726.2	chr13	86927755	86929524	+	ENSG00000110367.5	ENST00000264018.4	chr11	118620034	118661845	-	0.939477
ENST00000392399.3	chr2	137087011	137087483	-	ENSG00000170315.6	ENST00000302182.3	chr17	16284113	16286054	+	0.94926
ENST00000445194.2	chr20	29873120	29874638	-	ENSG00000108465.8	ENST00000536708.1	chr17	46047900	46059127	+	0.963792
ENST00000427163.1	chr13	90823120	90824053	+	ENSG00000197601.7	ENST00000354817.3	chr11	13690217	13753893	+	0.932548
ENST00000454627.1	chr7	133412121	133412487	-	ENSG00000135940.2	ENST00000258424.2	chr2	98262503	98264846	+	0.803815
ENST00000445629.1	chr11	5383845	5384079	+	ENSG00000134825.8	ENST00000543510.1	chr11	61556603	61560274	-	0.914894
ENST00000426103.1	chr10	28725130	28726007	+	ENSG00000168028.8	ENST00000301821.5	chr3	39448180	39453929	+	0.912301
ENST00000503783.1	chr5	118345755	118346237	+	ENSG00000170191.4	ENST00000304788.3	chr20	25593571	25604811	-	0.915114
ENST00000445213.1	chr9	98415194	98415548	+	ENSG00000101182.10	ENST00000442551.1	chr20	60711791	60714961	-	0.839437
ENST00000421857.1	chr9	43425719	43427042	-	ENSG00000004478.5	ENST00000001008.4	chr12	2904119	2913124	+	0.932024
ENST00000492925.1	chr3	75673837	75674304	-	ENSG00000198242.7	ENST00000422514.2	chr17	27046411	27051377	+	0.916667
ENST00000405355.1	chr6	110883378	110883818	-	ENSG00000105372.1	ENST00000221975.1	chr19	42363988	42375482	+	0.886621
ENST00000420064.1	chr3	193296601	193297202	-	ENSG00000156508.12	ENST00000331523.2	chr6	74227244	74231444	-	0.865449
ENST00000446218.1	chr2	176707615	176708030	+	ENSG00000162694.9	ENST00000370113.3	chr1	101337943	101360368	-	0.925481
ENST00000503863.1	chr4	35489432	35491493	+	ENSG00000025796.8	ENST00000369002.4	chr6	108188960	108279393	-	0.700291
ENST00000439895.1	chr2	39037574	39038796	-	ENSG00000130707.11	ENST00000372394.1	chr9	133320349	133376661	+	0.897792
ENST00000424783.1	chr2	99718481	99719215	+	ENSG00000108055.9	ENST00000361804.4	chr10	112327449	112364394	+	0.986395
ENST00000475156.1	chr8	101907999	101908346	+	ENSG00000197728.4	ENST00000356464.4	chr12	56435686	56438005	+	0.994253
ENST00000531724.1	chr11	122489559	122489982	+	ENSG00000160633.5	ENST00000433404.1	chr19	5623150	5668477	+	0.92217
ENST00000457882.1	chr9	103674602	103675023	+	ENSG00000114391.8	ENST00000469605.1	chr3	101400886	101405539	-	0.706161
ENST00000465163.1	chr8	18240784	18241427	-	ENSG00000198755.6	ENST00000322203.6	chr6	35436185	35438562	+	0.885093
ENST00000471495.1	chr3	167674099	167674404	-	ENSG00000172115.4	ENST00000305786.2	chr7	25159710	25164980	-	0.852941
ENST00000411661.1	chr3	30667915	30668289	-	ENSG00000171617.8	ENST00000302351.4	chr5	73923234	73937249	-	0.706667
ENST00000417216.2	chr12	66627862	66629014	-	ENSG00000153250.13	ENST00000348849.3	chr2	161128662	161350305	-	0.985256
ENST00000529152.1	chr11	33808600	33809341	-	ENSG00000166211.5	ENST00000299272.5	chr12	101870657	101880769	+	0.966307
ENST00000459650.1	chr7	128668943	128670581	+	ENSG00000115758.7	ENST00000234111.4	chr2	10580094	10588630	-	0.723002
ENST00000414224.1	chr6	31334129	31334675	-	ENSG00000228716.2	ENST00000439211.2	chr5	79922047	79950802	-	0.937843
ENST00000530771.1	chr11	41681580	41681771	+	ENSG00000134574.7	ENST00000256996.4	chr11	47236493	47260767	+	0.9375
ENST00000487566.1	chr11	129952390	129952676	-	ENSG00000109475.12	ENST00000394665.1	chr4	109541746	109546411	+	0.84669
ENST00000514850.1	chr4	56179178	56180091	-	ENSG00000171757.10	ENST00000522526.2	chr3	169511261	169530774	-	0.855335
ENST00000435693.1	chr1	227421970	227423056	+	ENSG00000164733.13	ENST00000434271.1	chr8	11700033	11725646	-	0.721072
ENST00000458710.1	chr9	21278054	21278618	-	ENSG00000214042.1	ENST00000239347.3	chr9	21201468	21202204	-	0.847788
ENST00000415468.1	chr7	152841398	152841673	-	ENSG00000188612.6	ENST00000420826.1	chr17	73163825	73179098	-	0.902174
ENST00000412317.1	chr3	37017807	37018331	+	ENSG00000135617.3	ENST00000258083.2	chr2	73455134	73460356	-	0.95619
ENST00000416640.1	chr22	21695884	21699531	+	ENSG00000196422.5	ENST00000356818.2	chr9	138371648	138380739	+	0.890077
ENST00000497678.1	chr1	52834347	52834911	+	ENSG00000123739.5	ENST00000243501.4	chr4	110634563	110651233	-	0.971681
ENST00000407841.1	chr6	127980835	127981724	-	ENSG00000177565.10	ENST00000430069.1	chr3	176737143	176914266	-	0.951163
ENST00000420608.1	chrX	117280026	117280524	+	ENSG00000197958.8	ENST00000361436.5	chr9	130209953	130213684	-	0.869739
ENST00000503377.1	chr4	2090445	2092344	-	ENSG00000112339.10	ENST00000367837.5	chr6	135281516	135376036	-	0.819474
ENST00000433227.1	chr10	94866629	94867140	-	ENSG00000132603.7	ENST00000254940.4	chr16	69373343	69377014	+	0.84375
ENST00000427761.1	chr13	68406008	68406959	-	ENSG00000181163.9	ENST00000296930.5	chr5	170814652	170838141	+	0.923319
ENST00000392354.2	chr6	136355655	136356026	-	ENSG00000135940.2	ENST00000258424.2	chr2	98262503	98264846	+	0.795699
ENST00000489235.2	chr4	58969313	58969600	+	ENSG00000075142.9	ENST00000265729.2	chr7	87834433	87849394	-	0.881944
ENST00000412243.2	chr5	96392106	96393062	-	ENSG00000119335.11	ENST00000372692.4	chr9	131445934	131458679	+	0.924765
ENST00000458402.1	chr20	4610073	4610865	-	ENSG00000129824.9	ENST00000250784.7	chrY	2709527	2734997	+	0.794451
ENST00000503681.1	chr4	41926197	41926397	+	ENSG00000048140.13	ENST00000507471.1	chr5	176074621	176084057	+	0.840796
ENST00000512440.1	chr5	149394348	149394717	-	ENSG00000155984.8	ENST00000502858.2	chrX	148679625	148690438	-	0.783784
ENST00000438308.1	chrX	65294677	65296189	-	ENSG00000063046.11	ENST00000262056.8	chr12	53400062	53435992	+	0.933906
ENST00000419730.1	chr22	44155079	44155790	-	ENSG00000174444.7	ENST00000307961.5	chr15	66790801	66797221	-	0.699438
ENST00000472160.1	chr8	53225714	53226060	-	ENSG00000109475.12	ENST00000394665.1	chr4	109541746	109546411	+	0.853026
ENST00000423046.1	chr9	46117312	46117651	+	ENSG00000204807.1	ENST00000377529.1	chr9	45733559	45734896	+	0.976471
ENST00000404229.1	chr6	138714510	138714681	+	ENSG00000173915.8	ENST00000309579.3	chr10	105148807	105156223	-	0.813953
ENST00000439258.2	chr17	18216074	18216847	+	ENSG00000122026.6	ENST00000311549.6	chr13	27825446	27830705	+	0.853763
ENST00000431286.1	chr7	43806889	43807198	+	ENSG00000160131.9	ENST00000370361.1	chrX	150565038	150573629	+	0.887097
ENST00000454256.1	chr9	40479774	40481174	+	ENSG00000134453.9	ENST00000446108.1	chr10	6131309	6159420	+	0.870995
ENST00000526931.1	chr11	50061788	50062069	-	ENSG00000077809.7	ENST00000324896.4	chr7	74072011	74175022	+	0.875887
ENST00000413296.1	chr1	203923768	203924908	+	ENSG00000108468.9	ENST00000393408.3	chr17	46147414	46178560	-	0.922201
ENST00000436802.1	chr1	44553633	44553765	-	ENSG00000159199.7	ENST00000393366.2	chr17	46970179	46973231	+	0.894737
ENST00000314232.7	chr4	39771701	39772991	-	ENSG00000204366.3	ENST00000375527.2	chr6	31867384	31869769	-	0.961676
ENST00000532151.1	chr11	84708271	84708812	-	ENSG00000143878.8	ENST00000272233.4	chr2	20646835	20649200	+	0.717712
ENST00000444641.1	chr9	132142420	132142749	-	ENSG00000174010.9	ENST00000328046.8	chrX	24001837	24045303	-	0.863636
ENST00000438957.1	chr3	27744620	27745059	-	ENSG00000163807.4	ENST00000296121.4	chr3	44790238	44803154	-	0.879545
ENST00000489759.1	chr7	138857262	138859012	-	ENSG00000005302.12	ENST00000361672.2	chrX	11776410	11793350	+	0.719589
ENST00000423231.1	chr1	22234591	22235073	+	ENSG00000122026.6	ENST00000311549.6	chr13	27825446	27830705	+	0.964803
ENST00000534066.1	chr11	42961325	42961548	+	ENSG00000164919.4	ENST00000523016.1	chr8	100899289	100905908	-	0.758929
ENST00000452266.1	chrX	48216560	48218930	+	ENSG00000065154.7	ENST00000368845.5	chr10	126085876	126107505	-	0.91634
ENST00000533722.1	chr8	11786106	11787072	-	ENSG00000237521.1	ENST00000456448.1	chr19	9361606	9362820	+	0.827301
ENST00000505836.1	chr4	88087996	88088886	+	ENSG00000076248.4	ENST00000542183.1	chr12	109541246	109547758	+	0.282828
ENST00000527291.1	chr11	82817622	82818003	-	ENSG00000135940.2	ENST00000258424.2	chr2	98262503	98264846	+	0.787958
ENST00000420122.1	chr2	63167051	63167417	+	ENSG00000008988.5	ENST00000524349.1	chr8	56985601	56987065	-	0.841962
ENST00000476880.1	chr3	94890764	94891221	+	ENSG00000231500.2	ENST00000439602.2	chr6	33239787	33244287	+	0.842795
ENST00000442562.1	chr17	18476066	18476275	+	ENSG00000233927.2	ENST00000449223.2	chr19	8386384	8387809	+	0.990476
ENST00000440529.1	chr13	71870342	71871367	+	ENSG00000136933.12	ENST00000259460.8	chr9	127962821	127996437	+	0.662768
ENST00000444087.1	chr9	44990718	44991060	-	ENSG00000204807.1	ENST00000377529.1	chr9	45733559	45734896	+	0.90379
ENST00000425480.1	chr1	119761932	119762719	-	ENSG00000089009.8	ENST00000424576.1	chr12	112842997	112847443	-	0.909898
ENST00000423237.1	chr7	42152964	42153219	+	ENSG00000198830.6	ENST00000361427.5	chr1	26799010	26802463	+	0.949219
ENST00000445859.1	chr11	1813783	1814100	+	ENSG00000241343.2	ENST00000427805.2	chrX	100645812	100651105	+	0.927673
ENST00000475327.1	chr7	140697752	140699600	-	ENSG00000115484.10	ENST00000394440.3	chr2	62095224	62115939	-	0.845315
ENST00000416139.1	chr1	212482393	212482860	-	ENSG00000198242.7	ENST00000422514.2	chr17	27046411	27051377	+	0.959402
ENST00000480487.1	chr14	35037895	35038335	-	ENSG00000105372.1	ENST00000221975.1	chr19	42363988	42375482	+	0.941043
ENST00000421872.1	chr2	95403082	95403994	+	ENSG00000064666.6	ENST00000263097.1	chr19	1026298	1039060	+	0.882804
ENST00000444762.1	chr9	26880176	26880547	-	ENSG00000132475.3	ENST00000254810.3	chr17	73772517	73775860	-	0.701613
ENST00000521237.1	chr5	156849447	156849881	+	ENSG00000161970.7	ENST00000293842.4	chr17	8280838	8286568	-	0.908046
ENST00000451327.1	chr1	210477029	210477881	+	ENSG00000171865.5	ENST00000315212.3	chr2	3592705	3606206	-	0.855803
ENST00000441944.1	chr9	7597823	7598371	+	ENSG00000196262.8	ENST00000468812.1	chr7	44836279	44842716	+	0.885246
ENST00000492126.1	chr3	96472029	96473515	+	ENSG00000179051.9	ENST00000375436.4	chr1	17733256	17766220	-	0.817081
ENST00000438468.1	chr7	44550624	44550931	-	ENSG00000241343.2	ENST00000427805.2	chrX	100645812	100651105	+	0.896104
ENST00000414704.1	chr10	82476239	82476824	-	ENSG00000171863.8	ENST00000304921.5	chr2	3622795	3628509	+	0.831058
ENST00000434010.1	chr20	32710276	32711096	+	ENSG00000140988.8	ENST00000343262.3	chr16	2012062	2014861	-	0.9257
ENST00000506193.1	chr4	336610	336751	-	ENSG00000184779.7	ENST00000330339.7	chr15	82821158	82824972	-	0.978873
ENST00000490750.1	chr11	61404152	61405112	+	ENSG00000089157.10	ENST00000228306.4	chr12	120634510	120639014	-	0.936524
ENST00000416185.1	chr1	161506392	161507950	-	ENSG00000186468.8	ENST00000296674.8	chr5	81569177	81574396	-	0.85533
ENST00000513916.1	chr4	77430437	77430872	-	ENSG00000063177.6	ENST00000450952.2	chr19	49119871	49122433	-	0.616972
ENST00000407594.2	chr2	132200217	132202160	-	ENSG00000188976.6	ENST00000327044.6	chr1	879584	894670	-	0.957819
ENST00000478559.1	chr3	103257479	103259331	-	ENSG00000117155.10	ENST00000342203.3	chr1	85109390	85156228	-	0.836481
ENST00000407697.1	chr6	19638271	19639429	-	ENSG00000169021.3	ENST00000304863.3	chr19	29698167	29704136	-	0.814474
ENST00000340589.3	chr4	89429748	89431354	-	ENSG00000138293.14	ENST00000438493.1	chr10	51565108	51590731	+	0.886878
ENST00000443005.1	chr9	38478468	38479347	+	ENSG00000187735.8	ENST00000521604.2	chr8	54879116	54935089	-	0.869318
ENST00000489727.2	chr5	139988670	139988985	+	ENSG00000130255.6	ENST00000394580.1	chr19	5690346	5691674	+	0.772152
ENST00000457576.1	chr20	17497488	17497952	+	ENSG00000143947.8	ENST00000272317.6	chr2	55459538	55462989	+	0.941935
ENST00000395058.3	chr2	206118028	206118227	-	ENSG00000106665.10	ENST00000539676.1	chr7	73703803	73815985	+	0.89
ENST00000274516.5	chr2	27050037	27050388	-	ENSG00000237190.3	ENST00000458198.2	chr5	133737778	133747589	-	0.909091
ENST00000449447.1	chrX	117766338	117768181	-	ENSG00000101773.11	ENST00000327155.4	chr18	20513290	20606449	+	0.654013
ENST00000454674.1	chr2	65728127	65729272	-	ENSG00000148719.9	ENST00000338820.3	chr10	74092588	74114907	-	0.892812
ENST00000445874.1	chr10	93566936	93567196	-	ENSG00000143742.8	ENST00000304786.7	chr1	225965531	225978168	+	1
ENST00000519417.1	chr8	43529413	43529734	-	ENSG00000164649.15	ENST00000406877.3	chr7	21940519	21985702	-	0.916149
ENST00000475555.1	chr4	144270428	144271270	-	ENSG00000140988.8	ENST00000343262.3	chr16	2012062	2014861	-	0.97153
ENST00000399253.3	chrX	140232663	140233358	+	ENSG00000130255.6	ENST00000394580.1	chr19	5690346	5691674	+	0.575676
ENST00000514574.1	chr5	147231207	147232222	-	ENSG00000171051.3	ENST00000304748.3	chr19	52249027	52255150	-	0.615157
ENST00000435954.2	chr6	54349967	54350648	-	ENSG00000074201.3	ENST00000525428.1	chr11	77325575	77348850	-	0.93695
ENST00000452411.1	chr7	98083431	98083929	-	ENSG00000153201.10	ENST00000283195.6	chr2	109335937	109402267	+	0.757515
ENST00000458172.1	chr13	41437735	41438038	-	ENSG00000172115.4	ENST00000305786.2	chr7	25159710	25164980	-	0.924342
ENST00000524156.1	chr8	26236908	26239035	-	ENSG00000198301.7	ENST00000356260.5	chr4	76871069	76912113	-	0.943442
ENST00000506906.1	chr4	11374210	11374745	-	ENSG00000167970.6	ENST00000454671.1	chr16	2303738	2312343	+	0.977612
ENST00000446623.1	chr2	98443711	98444010	+	ENSG00000205581.6	ENST00000380749.5	chr21	40714241	40721126	-	0.97
ENST00000451057.1	chr7	156990294	156991205	-	ENSG00000215114.3	ENST00000399598.2	chr8	59323823	59364060	+	0.964752
ENST00000432657.1	chr20	45626235	45627127	+	ENSG00000111640.8	ENST00000396858.1	chr12	6644468	6647481	+	0.734602
ENST00000476363.1	chr15	37782892	37783304	+	ENSG00000115268.3	ENST00000233609.3	chr19	1438363	1440492	+	0.898305
ENST00000529722.1	chr11	57633770	57634751	-	ENSG00000174942.1	ENST00000312253.1	chr11	56184734	56185708	-	0.578411
ENST00000427378.1	chr7	134813196	134814437	+	ENSG00000013561.13	ENST00000394520.2	chr5	141348604	141369856	+	0.938003
ENST00000457867.1	chr2	112432603	112432920	+	ENSG00000109475.12	ENST00000394668.2	chr4	109541812	109551568	+	0.836478
ENST00000545761.1	chr12	5692963	5693251	+	ENSG00000125971.12	ENST00000357156.2	chr20	33104214	33128762	+	0.892734
ENST00000440201.1	chrX	108811707	108813521	+	ENSG00000171109.13	ENST00000471841.1	chr3	179065480	179112719	+	0.952066
ENST00000495104.1	chr4	165841770	165842215	-	ENSG00000161970.7	ENST00000293842.4	chr17	8280838	8286568	-	0.912556
ENST00000545710.1	chr12	9658943	9661036	-	ENSG00000137040.8	ENST00000259569.5	chr9	6011043	6015618	-	0.951518
ENST00000523141.1	chr5	162188839	162189319	+	ENSG00000102931.2	ENST00000219204.2	chr16	57279010	57287547	+	0.804574
ENST00000495592.1	chr17	10763848	10764779	-	ENSG00000174748.11	ENST00000307839.4	chr3	23958036	23962338	+	0.831412
ENST00000457376.1	chr7	23695301	23695480	+	ENSG00000135002.5	ENST00000376736.1	chr9	79000433	79009421	-	0.827778
ENST00000427194.1	chrX	134919550	134921014	+	ENSG00000168282.3	ENST00000305386.2	chr14	50087489	50090198	+	0.794228
ENST00000471148.1	chr4	89084731	89085119	+	ENSG00000071082.5	ENST00000264258.3	chr2	101618177	101623729	+	0.8509
ENST00000484852.1	chr3	147884131	147885085	-	ENSG00000135486.10	ENST00000340913.5	chr12	54674488	54679028	+	0.926702
ENST00000435924.1	chr3	38568293	38568816	-	ENSG00000105640.6	ENST00000420197.2	chr19	17970730	17974962	+	0.883588
ENST00000429974.1	chr10	93525656	93526953	-	ENSG00000113194.7	ENST00000261942.6	chr5	175875356	175937075	+	0.886749
ENST00000517330.1	chr5	77337703	77339962	-	ENSG00000096384.13	ENST00000371562.5	chr6	44214838	44221475	+	0.578319
ENST00000416186.1	chr2	176048943	176049335	+	ENSG00000134419.9	ENST00000322989.4	chr16	18792617	18801656	-	0.905852
ENST00000398171.2	chr2	87865348	87866283	-	ENSG00000007168.5	ENST00000397195.3	chr17	2496923	2588909	+	0.929487
ENST00000448783.1	chr2	74640147	74640608	-	ENSG00000139988.4	ENST00000267502.3	chr14	68187559	68201167	+	0.820261
ENST00000416158.1	chrX	40619357	40620523	-	ENSG00000181885.11	ENST00000397317.3	chr17	7163223	7166264	-	0.582691
ENST00000430450.1	chr1	202736357	202736548	-	ENSG00000127184.6	ENST00000509578.1	chr5	85913773	85916578	+	0.973958
ENST00000436164.1	chr2	20355379	20355818	-	ENSG00000105193.3	ENST00000339471.3	chr19	39923852	39926576	-	0.868182
ENST00000422360.1	chr17	19400256	19400842	+	ENSG00000215472.3	ENST00000418495.1	chr18	47014858	47018906	-	0.900901
ENST00000456718.1	chr19	53095291	53100598	+	ENSG00000180257.7	ENST00000357666.4	chr19	53452632	53466114	-	0.868229
ENST00000401029.2	chr1	89859592	89860225	+	ENSG00000126247.4	ENST00000246533.2	chr19	36630918	36641254	+	0.829653
ENST00000510053.2	chr5	56613816	56615847	-	ENSG00000167721.4	ENST00000301364.3	chr17	2225992	2240678	-	0.901083
ENST00000404822.1	chr2	26109833	26110075	-	ENSG00000065518.7	ENST00000485064.1	chr3	120315175	120321171	+	0.917695
ENST00000416154.1	chr2	178042423	178042984	+	ENSG00000103266.3	ENST00000219548.3	chr16	730276	732753	+	0.864769
ENST00000464109.1	chr11	72419231	72419610	+	ENSG00000112306.7	ENST00000230050.3	chr6	133135580	133138703	+	0.797368
ENST00000439968.1	chrY	20694212	20694542	-	ENSG00000154582.11	ENST00000518127.1	chr8	74857354	74884522	-	0.806647
ENST00000521205.1	chr8	87605983	87606817	-	ENSG00000100253.8	ENST00000216075.6	chr22	50925253	50928483	+	0.863473
ENST00000512887.1	chr4	168569581	168569947	+	ENSG00000167085.6	ENST00000300408.3	chr17	47481414	47492242	-	0.831063
ENST00000534163.1	chr11	86005802	86006618	+	ENSG00000119335.11	ENST00000372692.4	chr9	131445934	131458679	+	0.886169
ENST00000504528.1	chr4	113747463	113748760	+	ENSG00000141384.6	ENST00000269142.4	chr18	23806409	23971642	+	0.940678
ENST00000438345.1	chr9	47001334	47001835	+	ENSG00000184860.4	ENST00000532128.1	chr16	82033304	82045086	-	0.760956
ENST00000407015.1	chr6	103450389	103451772	+	ENSG00000166855.3	ENST00000300107.2	chr15	65440557	65477762	-	0.705925
ENST00000509352.1	chr5	147301742	147302984	+	ENSG00000254772.2	ENST00000329251.4	chr11	62327073	62341445	-	0.868866
ENST00000418987.1	chr9	103493522	103494621	+	ENSG00000075624.8	ENST00000331789.5	chr7	5566782	5570340	-	0.888182
ENST00000483735.1	chr19	53999141	53999291	+	ENSG00000198918.6	ENST00000422326.1	chrX	118920510	118925296	-	0.907285
ENST00000468715.1	chr1	97144430	97145176	-	ENSG00000147604.9	ENST00000396467.1	chr8	74202519	74205868	-	0.994645
ENST00000458227.1	chr2	25191827	25192093	-	ENSG00000110700.2	ENST00000525634.1	chr11	17095936	17099334	-	0.88764
ENST00000414059.1	chr1	52625942	52626274	-	ENSG00000197894.6	ENST00000296412.8	chr4	99992132	100009902	-	0.963964
ENST00000510606.1	chr4	159390738	159391854	+	ENSG00000062194.10	ENST00000514387.2	chr5	56469876	56559414	+	0.849693
ENST00000494834.1	chr3	169663775	169664542	-	ENSG00000022267.11	ENST00000543669.1	chrX	135251455	135293518	+	0.927083
ENST00000418783.1	chr22	41460056	41460637	+	ENSG00000170889.9	ENST00000402367.1	chr19	54704740	54711515	+	0.972509
ENST00000426223.1	chr7	90949443	90950418	-	ENSG00000140157.9	ENST00000337451.3	chr15	23004684	23034408	-	0.777664
ENST00000434123.1	chr9	42266931	42267558	+	ENSG00000197927.7	ENST00000355171.4	chr2	132479948	132524973	+	0.961783
ENST00000418950.1	chr1	1667256	1668690	+	ENSG00000171863.8	ENST00000304921.5	chr2	3622795	3628509	+	0.861723
ENST00000415786.1	chrX	80618767	80619669	+	ENSG00000120280.5	ENST00000378962.3	chrX	30576941	30595961	-	0.662237
ENST00000520009.1	chr8	65466793	65467032	-	ENSG00000189043.5	ENST00000339600.5	chr7	10971578	10979883	-	0.8875
ENST00000467206.1	chr5	132507910	132508745	-	ENSG00000089009.8	ENST00000424576.1	chr12	112842997	112847443	-	0.843301
ENST00000435405.1	chr9	17108302	17108602	-	ENSG00000071082.5	ENST00000409711.1	chr2	101619153	101622829	+	0.800664
ENST00000443167.1	chr13	19239375	19241361	+	ENSG00000141965.3	ENST00000269856.3	chr19	4791728	4795571	+	0.953699
ENST00000412942.1	chr21	30500022	30500509	-	ENSG00000197958.8	ENST00000361436.5	chr9	130209953	130213684	-	0.731557
ENST00000440922.1	chr1	55833138	55834447	+	ENSG00000125166.6	ENST00000245206.4	chr16	58741035	58768184	-	0.838931
ENST00000411559.1	chr2	202689271	202689555	+	ENSG00000244687.3	ENST00000340309.3	chr20	48697661	48732491	-	0.915789
ENST00000505048.1	chr5	108924039	108925293	+	ENSG00000111057.5	ENST00000388835.2	chr12	53342843	53346684	+	0.90757
ENST00000458183.1	chr22	40146132	40147298	+	ENSG00000146410.7	ENST00000418509.2	chr6	136560608	136571432	-	0.602399
ENST00000435787.1	chr6	29675902	29676324	-	ENSG00000180776.11	ENST00000400590.3	chr13	21950263	22033509	-	0.862884
ENST00000476193.1	chr4	109328999	109329734	-	ENSG00000168028.8	ENST00000301821.5	chr3	39448180	39453929	+	0.692935
ENST00000510857.1	chr5	29796045	29796375	+	ENSG00000111775.1	ENST00000229379.1	chr12	120875904	120878532	+	0.719033
ENST00000492051.1	chr11	129407764	129408009	+	ENSG00000177954.7	ENST00000368567.4	chr1	153963235	153964626	+	0.849593
ENST00000414667.1	chrY	2863108	2863314	-	ENSG00000156508.12	ENST00000456206.1	chr6	74227520	74230741	-	0.806763
ENST00000514243.1	chr5	111882670	111883202	+	ENSG00000163444.7	ENST00000367242.3	chr1	202976514	202993976	+	0.776735
ENST00000471178.1	chr19	35024332	35024991	-	ENSG00000197728.4	ENST00000356464.4	chr12	56435686	56438005	+	0.91954
ENST00000483963.1	chr15	64885178	64885525	+	ENSG00000197728.4	ENST00000356464.4	chr12	56435686	56438005	+	0.988506
ENST00000466005.2	chr5	72021246	72021978	+	ENSG00000147604.9	ENST00000396467.1	chr8	74202519	74205868	-	0.616644
ENST00000412884.1	chr2	83822080	83822367	+	ENSG00000145592.9	ENST00000274242.5	chr5	40825364	40835437	-	0.815972
ENST00000441105.1	chr2	194141393	194142339	-	ENSG00000104129.3	ENST00000220496.3	chr15	41060067	41099671	-	0.841605
ENST00000448832.1	chr21	22200445	22200940	-	ENSG00000196262.8	ENST00000468812.1	chr7	44836279	44842716	+	0.899194
ENST00000442083.1	chr7	105459938	105460547	+	ENSG00000142541.10	ENST00000391857.4	chr19	49990811	49995565	+	0.913115
ENST00000435601.1	chr13	59102749	59105160	+	ENSG00000150527.10	ENST00000280083.3	chr14	39736350	39820599	+	0.923715
ENST00000433816.1	chr1	120076372	120077369	-	ENSG00000111640.8	ENST00000229239.5	chr12	6643093	6647537	+	0.856713
ENST00000488803.1	chr12	118683889	118684767	+	ENSG00000140988.8	ENST00000343262.3	chr16	2012062	2014861	-	0.987486
ENST00000434630.1	chr2	65738905	65739210	-	ENSG00000134419.9	ENST00000322989.4	chr16	18792617	18801656	-	0.908497
ENST00000418412.2	chr4	98969705	98970189	+	ENSG00000128951.6	ENST00000455976.1	chr15	48624365	48635570	+	0.828866
ENST00000455482.1	chr10	95897505	95899257	+	ENSG00000116478.7	ENST00000373548.3	chr1	32757687	32799236	+	0.840138
ENST00000527568.1	chr11	9652555	9652906	-	ENSG00000131873.4	ENST00000254190.3	chr15	101715928	101792137	-	0.914773
ENST00000501248.2	chr12	8664970	8665322	-	ENSG00000213246.1	ENST00000225504.3	chr17	56422539	56429563	-	0.937677
ENST00000428736.1	chr2	230566510	230566864	+	ENSG00000129235.5	ENST00000250101.4	chr17	6544078	6547920	+	0.811268
ENST00000419500.1	chr1	182911250	182911539	-	ENSG00000205581.6	ENST00000380749.5	chr21	40714241	40721126	-	0.962069
ENST00000399474.2	chrX	44335273	44336668	-	ENSG00000160752.10	ENST00000447866.1	chr1	155278539	155290457	+	0.926206
ENST00000421443.1	chr7	143493388	143493813	+	ENSG00000161970.7	ENST00000293842.4	chr17	8280838	8286568	-	0.901408
ENST00000482905.1	chr17	21407884	21408385	+	ENSG00000122026.6	ENST00000311549.6	chr13	27825446	27830705	+	0.983193
ENST00000418798.1	chr7	138175326	138176106	-	ENSG00000145425.5	ENST00000514682.1	chr4	152020781	152025789	+	0.887324
ENST00000445867.1	chr22	45671480	45671966	+	ENSG00000124614.9	ENST00000344700.3	chr6	34385231	34392998	-	0.882957
ENST00000392260.2	chr6	150363682	150364489	+	ENSG00000167085.6	ENST00000300408.3	chr17	47481414	47492242	-	0.920792
ENST00000435098.1	chr7	20681181	20681571	-	ENSG00000164611.8	ENST00000352433.5	chr5	159848829	159855748	+	0.797954
ENST00000418640.1	chr9	44881128	44881544	+	ENSG00000231997.1	ENST00000426006.1	chr9	46390277	46390685	+	0.793765
ENST00000464664.1	chr21	44985120	44985500	+	ENSG00000196374.5	ENST00000359465.4	chr6	27782822	27783267	+	0.87664
ENST00000508026.3	chr8	150385	150562	-	ENSG00000154997.8	ENST00000388975.3	chr7	55861237	55930482	-	0.994382
ENST00000447755.1	chr2	196858983	196860404	-	ENSG00000112242.9	ENST00000346618.3	chr6	20402398	20493941	+	0.781997
ENST00000407725.1	chr6	87709764	87710007	-	ENSG00000065911.7	ENST00000409601.1	chr2	74425743	74442404	+	0.827869
ENST00000442535.1	chrY	25012691	25013903	-	ENSG00000234444.3	ENST00000423484.1	chr7	63774407	63809884	+	0.823578
ENST00000523057.1	chr5	172402514	172403377	+	ENSG00000180817.6	ENST00000373232.2	chr10	71962587	71993183	-	0.962963
ENST00000441651.1	chr9	91585806	91586256	-	ENSG00000081154.7	ENST00000265260.3	chr3	101292939	101313281	+	0.873614
ENST00000438811.1	chr7	32991038	32991268	+	ENSG00000148303.12	ENST00000323345.6	chr9	136215069	136218281	+	0.926407
ENST00000435784.1	chr1	68509032	68509920	+	ENSG00000124523.9	ENST00000379262.4	chr6	13574833	13605971	+	0.830146
ENST00000514175.1	chr4	117519317	117520767	+	ENSG00000130402.4	ENST00000252699.2	chr19	39138310	39222223	+	0.940731
ENST00000424481.1	chrX	118354745	118355705	+	ENSG00000135486.10	ENST00000330752.6	chr12	54674488	54679028	+	0.94693
ENST00000503717.1	chr5	90326807	90327124	-	ENSG00000153485.4	ENST00000283534.4	chr14	93651296	93653431	+	0.940252
ENST00000434698.1	chr7	126151189	126152933	+	ENSG00000070756.8	ENST00000517990.1	chr8	101715513	101719007	-	0.215473
ENST00000453169.1	chr13	42943347	42943793	-	ENSG00000121769.3	ENST00000373713.2	chr1	31838472	31845923	-	0.872483
ENST00000502347.1	chr5	30365512	30365791	-	ENSG00000144635.4	ENST00000273130.4	chr3	32567463	32612366	-	0.957143
ENST00000419089.1	chrX	24447690	24448037	-	ENSG00000197728.4	ENST00000356464.4	chr12	56435686	56438005	+	0.994253
ENST00000434950.1	chr7	88239555	88239983	-	ENSG00000122490.12	ENST00000351365.2	chr18	77662421	77711653	-	0.738928
ENST00000415467.1	chrX	48271748	48274761	+	ENSG00000065154.7	ENST00000368845.5	chr10	126085876	126107505	-	0.918421
ENST00000416471.2	chr2	202486369	202488153	-	ENSG00000074800.8	ENST00000234590.4	chr1	8921061	8938749	-	0.572549
ENST00000441206.1	chr10	82006975	82007439	-	ENSG00000132507.12	ENST00000336458.7	chr17	7210692	7215782	+	0.984946
ENST00000406493.1	chr6	88150883	88151864	-	ENSG00000123505.9	ENST00000368885.3	chr6	111195973	111216916	+	0.858452
ENST00000421194.1	chr9	140682122	140683139	-	ENSG00000160973.6	ENST00000377317.4	chr8	145698795	145701718	-	0.85167
ENST00000427395.1	chr1	202968866	202969480	+	ENSG00000008988.5	ENST00000523936.1	chr8	56985632	56986915	-	0.819355
ENST00000513369.1	chr16	28251010	28251988	-	ENSG00000111640.8	ENST00000229239.5	chr12	6643093	6647537	+	0.916241
ENST00000441469.1	chr1	224485348	224486302	+	ENSG00000122026.6	ENST00000311549.6	chr13	27825446	27830705	+	0.869198
ENST00000469026.1	chr12	112739677	112740467	-	ENSG00000148303.12	ENST00000323345.6	chr9	136215069	136218281	+	0.940582
ENST00000417974.1	chr2	110310113	110310423	+	ENSG00000145592.9	ENST00000508493.1	chr5	40833981	40835314	-	0.762058
ENST00000514501.1	chr4	151343797	151344794	-	ENSG00000154328.9	ENST00000284503.6	chr8	11627248	11644855	+	0.907816
ENST00000502591.1	chr5	35896290	35896392	-	ENSG00000152611.7	ENST00000513623.1	chr5	35904704	35938737	-	0.854369
ENST00000478593.1	chr4	79689653	79689904	+	ENSG00000171858.11	ENST00000370562.1	chr20	60962353	60963576	+	0.853175
ENST00000509466.1	chr4	69166353	69168178	+	ENSG00000156096.8	ENST00000305107.6	chr4	70345883	70361626	-	0.803922
ENST00000418879.1	chr6	137865034	137865509	-	ENSG00000145741.10	ENST00000380591.3	chr5	72794274	72801460	+	0.697479
ENST00000491760.2	chr4	112473010	112473329	+	ENSG00000241343.2	ENST00000427805.2	chrX	100645812	100651105	+	0.909375
ENST00000423587.1	chr22	44879375	44879597	-	ENSG00000163319.6	ENST00000295491.4	chr4	84377118	84383451	+	0.950673
ENST00000447827.1	chr1	162511122	162511418	-	ENSG00000156467.5	ENST00000287022.5	chr8	97238148	97247862	-	0.868687
ENST00000438989.1	chr2	20439653	20440807	-	ENSG00000185721.5	ENST00000331457.4	chr22	31795509	31830438	+	0.91342
ENST00000422215.1	chr1	239216048	239216203	-	ENSG00000198918.6	ENST00000361575.3	chrX	118920469	118925606	-	0.974359
ENST00000508566.1	chr4	10256363	10258245	-	ENSG00000132155.7	ENST00000251849.4	chr3	12625100	12705725	-	0.802443
ENST00000441083.1	chr1	104469189	104470428	+	ENSG00000006125.10	ENST00000312678.7	chr17	33914282	34053434	+	0.915323
ENST00000467527.1	chr3	109115463	109116717	+	ENSG00000133641.10	ENST00000356891.2	chr12	88429268	88443936	+	0.8451
ENST00000448532.1	chr10	103845233	103845487	-	ENSG00000113558.12	ENST00000353411.5	chr5	133492082	133512729	-	0.909804
ENST00000450025.1	chr7	146843434	146843848	+	ENSG00000128951.6	ENST00000331200.2	chr15	48623621	48635570	+	0.795181
ENST00000545370.1	chr12	8831369	8832266	+	ENSG00000131944.4	ENST00000254262.4	chr19	33463148	33467946	+	0.81993
ENST00000424043.2	chr1	92580359	92581362	-	ENSG00000111640.8	ENST00000229239.5	chr12	6643093	6647537	+	0.866534
ENST00000428697.1	chr6	73308179	73309362	-	ENSG00000143452.10	ENST00000368995.4	chr1	150670536	150693352	-	0.862331
ENST00000426062.1	chr9	42779314	42779707	+	ENSG00000144015.4	ENST00000272395.2	chr2	96257766	96265526	+	0.829949
ENST00000426082.1	chr9	111583977	111584284	+	ENSG00000241343.2	ENST00000427805.2	chrX	100645812	100651105	+	0.775974
ENST00000415778.1	chr6	93801694	93802478	-	ENSG00000115233.7	ENST00000409682.3	chr2	162164549	162268228	+	0.703185
ENST00000435436.1	chr10	32398789	32400594	+	ENSG00000182077.6	ENST00000438700.3	chr10	27687116	27703297	-	0.91458
ENST00000514785.1	chr4	103648431	103651878	-	ENSG00000176681.9	ENST00000393466.2	chr17	44371149	44415160	+	0.882657
ENST00000495947.1	chr16	7176294	7176640	-	ENSG00000197728.4	ENST00000356464.4	chr12	56435686	56438005	+	0.884726
ENST00000490892.1	chr6	39007379	39007761	-	ENSG00000140988.8	ENST00000343262.3	chr16	2012062	2014861	-	0.744125
ENST00000417131.1	chr10	52722753	52723118	-	ENSG00000160124.5	ENST00000291458.5	chr3	122078438	122102078	-	0.915301
ENST00000411473.1	chrX	147279534	147280398	-	ENSG00000143575.10	ENST00000328703.7	chr1	154244987	154248351	+	0.914451
ENST00000447765.1	chr13	39191556	39192077	-	ENSG00000165672.5	ENST00000298510.2	chr10	120927222	120938345	-	0.795019
ENST00000429999.1	chr9	84583753	84586985	+	ENSG00000214929.2	ENST00000344803.2	chr9	84603687	84610171	+	0.651717
ENST00000393579.2	chr12	66039772	66040242	-	ENSG00000081154.7	ENST00000265260.3	chr3	101292939	101313281	+	0.942675
ENST00000449839.1	chr19	12618943	12619077	+	ENSG00000196262.8	ENST00000468812.1	chr7	44836279	44842716	+	0.933333
ENST00000511263.1	chr3	134156447	134157053	+	ENSG00000029993.10	ENST00000325307.7	chrX	150151759	150159248	+	0.846787
ENST00000442676.1	chrX	150192078	150192203	-	ENSG00000197958.8	ENST00000361436.5	chr9	130209953	130213684	-	0.936508
ENST00000413753.1	chr4	118334618	118335435	+	ENSG00000205246.4	ENST00000354585.4	chr19	24009921	24010917	+	0.718826
ENST00000417269.1	chr2	76333142	76334450	-	ENSG00000136143.7	ENST00000543413.1	chr13	48517469	48612125	-	0.860963
ENST00000424829.1	chr1	52174734	52175612	+	ENSG00000151729.5	ENST00000281456.5	chr4	186064395	186068434	+	0.717861
ENST00000413175.1	chr1	155402969	155404046	+	ENSG00000204531.7	ENST00000259915.6	chr6	31132128	31138470	-	0.971243
ENST00000506922.1	chr5	162843531	162843737	+	ENSG00000187772.6	ENST00000345080.4	chr6	105404923	105531207	+	0.951691
ENST00000531501.1	chr11	129165184	129166376	-	ENSG00000177842.7	ENST00000314529.6	chr3	40547530	40560227	+	0.844091
ENST00000428821.1	chrX	123414380	123415272	+	ENSG00000181163.9	ENST00000296930.5	chr5	170814652	170838141	+	0.907055
ENST00000434379.1	chr3	191670138	191670615	-	ENSG00000112378.9	ENST00000421351.2	chr6	138411923	138428648	-	0.820084
ENST00000449385.1	chr10	120332383	120333132	+	ENSG00000182902.8	ENST00000327451.5	chr22	18043139	18073647	+	0.812775
ENST00000455969.1	chr2	112500163	112502239	+	ENSG00000166451.8	ENST00000305850.5	chr16	81040103	81062927	+	0.813176
ENST00000518337.1	chr8	74128164	74128862	-	ENSG00000096384.13	ENST00000353801.3	chr6	44214824	44221620	+	0.88412
ENST00000514065.1	chr5	87678765	87679077	+	ENSG00000147403.12	ENST00000424325.2	chrX	153626571	153630680	+	0.833866
ENST00000495613.1	chr13	50746225	50747317	+	ENSG00000100380.7	ENST00000216218.3	chr22	41220539	41253026	-	0.981702
ENST00000457883.1	chr13	68863811	68865412	-	ENSG00000118985.9	ENST00000237853.4	chr5	95220802	95297775	-	0.757803
ENST00000442718.1	chr2	209330963	209331351	-	ENSG00000132475.3	ENST00000254810.3	chr17	73772517	73775860	-	0.70437
ENST00000448483.1	chr1	169959208	169959336	+	ENSG00000048544.5	ENST00000053468.3	chr6	42174539	42185603	-	0.945736
ENST00000433990.1	chr1	106433315	106434052	-	ENSG00000015479.12	ENST00000394800.2	chr5	138609793	138667360	+	0.944351
ENST00000471756.2	chr4	83415990	83417046	-	ENSG00000137154.8	ENST00000380394.4	chr9	19375713	19380252	-	0.69631
ENST00000427588.1	chr2	101207590	101207788	+	ENSG00000198830.6	ENST00000361427.5	chr1	26799010	26802463	+	0.748744
ENST00000505789.1	chr5	45574692	45576714	+	ENSG00000221944.3	ENST00000408957.3	chr2	233412779	233415226	-	0.699951
ENST00000433137.1	chrX	45811197	45811768	-	ENSG00000118579.6	ENST00000237380.6	chr4	17616254	17627254	+	0.853147
ENST00000478174.1	chr5	64711180	64712049	+	ENSG00000140988.8	ENST00000343262.3	chr16	2012062	2014861	-	0.866667
ENST00000443481.1	chr1	120428927	120429550	+	ENSG00000134250.11	ENST00000256646.2	chr1	120454176	120612240	-	0.793269
ENST00000424606.1	chr9	99717359	99717737	+	ENSG00000196449.3	ENST00000373044.2	chr1	38268616	38273857	-	0.862797
ENST00000507986.1	chr5	23980696	23981047	+	ENSG00000197894.6	ENST00000296412.8	chr4	99992132	100009902	-	0.931818
ENST00000431810.1	chr10	110607944	110609319	+	ENSG00000089022.7	ENST00000202788.6	chr12	112280279	112331227	+	0.737645
ENST00000447764.1	chr2	71030289	71030558	+	ENSG00000198830.6	ENST00000361427.5	chr1	26799010	26802463	+	0.918519
ENST00000473520.1	chr7	124116425	124117009	+	ENSG00000160075.9	ENST00000359060.3	chr1	1497732	1509964	-	0.776068
ENST00000415560.1	chrX	26766146	26767207	+	ENSG00000137309.14	ENST00000395004.3	chr6	34204656	34213888	+	0.865348
ENST00000536923.1	chr11	73561514	73562256	-	ENSG00000160124.5	ENST00000479414.1	chr3	122078709	122091869	-	0.840278
ENST00000521340.1	chr17	58928743	58929106	+	ENSG00000205581.6	ENST00000361263.4	chr21	40714242	40718454	-	0.791209
ENST00000518583.1	chr8	99918488	99918745	-	ENSG00000173141.4	ENST00000309594.4	chr13	21750784	21753223	+	0.782946
ENST00000429219.1	chr9	21058770	21059322	-	ENSG00000171855.5	ENST00000380232.2	chr9	21077104	21077943	-	0.61302
ENST00000454959.1	chr7	96487494	96488930	+	ENSG00000072518.14	ENST00000425897.2	chr11	63662676	63676709	+	0.729297
ENST00000452925.1	chr2	135554739	135555449	+	ENSG00000165637.9	ENST00000313132.4	chr10	76970606	76991035	+	0.78903
ENST00000421570.1	chr2	74981797	74981946	-	ENSG00000233927.2	ENST00000449223.2	chr19	8386384	8387809	+	0.953333
ENST00000447151.1	chr11	116988510	116989897	-	ENSG00000167005.7	ENST00000300291.5	chr16	56463045	56485287	-	0.85022
ENST00000452006.1	chr3	33118696	33118983	+	ENSG00000188612.6	ENST00000420826.1	chr17	73163825	73179098	-	0.916667
ENST00000446021.1	chr1	194687925	194688366	+	ENSG00000134375.6	ENST00000367287.4	chr1	201924619	201939789	+	0.864253
ENST00000475510.1	chr3	124452265	124452601	-	ENSG00000197728.4	ENST00000356464.4	chr12	56435686	56438005	+	0.845697
ENST00000406229.2	chr21	28864437	28864580	+	ENSG00000162736.10	ENST00000435149.1	chr1	160321866	160326544	+	0.770833
ENST00000427485.1	chr1	148644086	148644574	+	ENSG00000196262.8	ENST00000468812.1	chr7	44836279	44842716	+	0.912065
ENST00000436405.1	chr21	27135249	27135644	-	ENSG00000139233.2	ENST00000266604.2	chr12	66516842	66524548	-	0.886364
ENST00000504007.1	chr5	77518008	77518341	+	ENSG00000136888.6	ENST00000374050.3	chr9	117350026	117360653	+	0.838323
ENST00000450007.1	chr21	47840467	47840948	-	ENSG00000105640.6	ENST00000420197.2	chr19	17970730	17974962	+	0.786307
ENST00000423475.1	chr1	226151879	226152128	+	ENSG00000170906.9	ENST00000485876.1	chr19	54606145	54610875	+	0.876
ENST00000532834.1	chr11	17457224	17457728	-	ENSG00000143252.9	ENST00000367975.2	chr1	161284047	161332984	+	0.936634
ENST00000472104.1	chr8	28667620	28667935	+	ENSG00000241343.2	ENST00000392994.3	chrX	100645977	100650781	+	0.838608
ENST00000441175.1	chr10	67007790	67008550	-	ENSG00000078747.7	ENST00000374864.4	chr20	32951041	33099198	+	0.746386
ENST00000423136.1	chr15	44355709	44356511	+	ENSG00000111640.8	ENST00000229239.5	chr12	6643093	6647537	+	0.853051
ENST00000504529.1	chr4	49525689	49525894	-	ENSG00000204860.4	ENST00000377680.3	chr9	38621085	38624987	+	0.776699
ENST00000478450.1	chr19	33454405	33454771	+	ENSG00000071082.5	ENST00000409711.1	chr2	101619153	101622829	+	0.814714
ENST00000529735.1	chr11	120490643	120490976	-	ENSG00000154582.11	ENST00000518127.1	chr8	74857354	74884522	-	0.922156
ENST00000518682.1	chr8	126964105	126964558	-	ENSG00000142168.9	ENST00000270142.6	chr21	33031935	33041244	+	0.856828
ENST00000511478.1	chr5	108387016	108388158	-	ENSG00000152661.6	ENST00000282561.3	chr6	121756838	121770873	+	0.970254
ENST00000419943.1	chr21	37504748	37505330	+	ENSG00000170889.9	ENST00000302907.4	chr19	54704610	54711515	+	0.886792
ENST00000447525.1	chr1	80961588	80961918	+	ENSG00000111775.1	ENST00000229379.1	chr12	120875904	120878532	+	0.900302
ENST00000438212.1	chr2	210952950	210953788	+	ENSG00000089009.8	ENST00000424576.1	chr12	112842997	112847443	-	0.840286
ENST00000429959.1	chr1	93214713	93214887	-	ENSG00000132475.3	ENST00000254810.3	chr17	73772517	73775860	-	0.674286
ENST00000419030.1	chr1	208870714	208871043	-	ENSG00000197728.4	ENST00000356464.4	chr12	56435686	56438005	+	0.963636
ENST00000437166.1	chr1	41407924	41408188	-	ENSG00000244687.3	ENST00000340309.3	chr20	48697661	48732491	-	0.886792
ENST00000468366.1	chr3	114649388	114650296	+	ENSG00000060138.8	ENST00000279550.7	chr12	10851683	10875906	-	0.674367
ENST00000485187.1	chr3	135678117	135678432	-	ENSG00000145494.7	ENST00000274137.5	chr5	1801514	1816719	+	0.787975
ENST00000453927.2	chr12	11634317	11634590	+	ENSG00000181061.9	ENST00000452906.2	chr3	42826744	42845925	-	0.828467
ENST00000451936.1	chr9	65973175	65974597	+	ENSG00000168214.15	ENST00000342320.4	chr4	26364058	26436541	+	0.936753
ENST00000433817.1	chr9	13322805	13323654	-	ENSG00000153487.11	ENST00000375774.3	chr13	111367329	111373418	+	0.701176
ENST00000444021.1	chr10	51023142	51023608	+	ENSG00000122026.6	ENST00000311549.6	chr13	27825446	27830705	+	0.862955
ENST00000411678.1	chr2	228666556	228669421	+	ENSG00000118777.6	ENST00000503830.1	chr4	89052996	89080391	-	0.105373
ENST00000413639.1	chr3	15919554	15921078	+	ENSG00000106348.12	ENST00000343214.4	chr7	128032355	128050027	-	0.872787
ENST00000450301.2	chr10	57427101	57428110	-	ENSG00000111640.8	ENST00000396856.1	chr12	6643698	6647506	+	0.864356
ENST00000472363.1	chr17	26443265	26443432	-	ENSG00000213741.3	ENST00000245458.6	chr14	50050290	50053094	-	0.880952
ENST00000458706.1	chrY	20230369	20230696	+	ENSG00000154582.11	ENST00000518127.1	chr8	74857354	74884522	-	0.746951
ENST00000404534.1	chr6	138026560	138028338	-	ENSG00000179295.10	ENST00000351677.2	chr12	112856718	112947717	+	0.926925
ENST00000537123.1	chr12	122806669	122808883	-	ENSG00000144395.12	ENST00000272831.7	chr2	197504278	197597524	+	0.614898
ENST00000428923.1	chr7	102729111	102730057	-	ENSG00000116791.9	ENST00000417775.1	chr1	75171174	75199092	-	0.862724
ENST00000448352.1	chr14	54079442	54080123	+	ENSG00000145425.5	ENST00000514682.1	chr4	152020781	152025789	+	0.780059
ENST00000504215.1	chr5	41585984	41587889	-	ENSG00000120438.7	ENST00000321394.7	chr6	160199530	160210781	-	0.893086
ENST00000512654.1	chr4	87797495	87797801	+	ENSG00000146574.10	ENST00000316731.8	chr7	6837992	6866401	-	0.964169
ENST00000450915.1	chr7	88268328	88269730	+	ENSG00000156508.12	ENST00000316292.9	chr6	74225473	74230741	-	0.887384
ENST00000419331.1	chr20	23969929	23971084	+	ENSG00000182356.5	ENST00000427789.2	chr22	18834061	18835942	+	0.967993
ENST00000407947.1	chr6	71785267	71786078	+	ENSG00000126581.7	ENST00000543382.1	chr17	40962432	40976301	-	0.665025
ENST00000411999.1	chr2	197893435	197894867	-	ENSG00000174444.7	ENST00000307961.5	chr15	66790801	66797221	-	0.852915
ENST00000402041.1	chr6	117369833	117370001	-	ENSG00000213741.3	ENST00000245458.6	chr14	50050290	50053094	-	0.816568
ENST00000415616.1	chr2	99310572	99311953	+	ENSG00000134308.8	ENST00000381844.4	chr2	9724101	9770745	-	0.654124
ENST00000482594.1	chr1	201489184	201489678	+	ENSG00000124614.9	ENST00000344700.3	chr6	34385231	34392998	-	0.955556
ENST00000436100.1	chr10	101874174	101874980	-	ENSG00000167460.8	ENST00000300933.3	chr19	16187135	16213813	+	0.817844
ENST00000442896.1	chr6	85139302	85140520	-	ENSG00000073584.13	ENST00000348513.6	chr17	38781214	38804760	-	0.917966
ENST00000426873.1	chr3	9642432	9644412	+	ENSG00000138166.4	ENST00000369583.3	chr10	112257596	112271302	+	0.844143
ENST00000463604.1	chr11	92785561	92785993	-	ENSG00000161970.7	ENST00000293842.4	chr17	8280838	8286568	-	0.845266
ENST00000404287.1	chr6	129250144	129251134	-	ENSG00000106484.8	ENST00000223215.4	chr7	130131934	130146133	+	0.948537
ENST00000457210.1	chrX	52228192	52229056	-	ENSG00000086589.7	ENST00000199814.4	chr5	150070356	150080669	-	0.818497
ENST00000398689.2	chr10	76414714	76415889	+	ENSG00000168495.7	ENST00000397802.3	chr8	22102748	22109485	+	0.878401
ENST00000452600.1	chr2	130986952	130989186	+	ENSG00000188976.6	ENST00000327044.6	chr1	879584	894670	-	0.951678
ENST00000523425.1	chr8	51403355	51404025	+	ENSG00000117525.9	ENST00000334047.7	chr1	94994781	95007356	-	0.782414
ENST00000508433.1	chr4	54793666	54794305	-	ENSG00000139579.6	ENST00000380198.2	chr12	56618143	56623638	+	0.8625
ENST00000428894.1	chr10	112210387	112210998	+	ENSG00000029993.10	ENST00000325307.7	chrX	150151759	150159248	+	0.887255
ENST00000451818.1	chr1	203626095	203626888	-	ENSG00000164346.5	ENST00000296802.5	chr5	74062817	74072737	+	0.924433
ENST00000447680.1	chr10	54148872	54149248	-	ENSG00000071082.5	ENST00000409733.1	chr2	101618755	101622881	+	0.915119
ENST00000434626.1	chr2	128908728	128908878	-	ENSG00000232112.3	ENST00000438607.2	chr3	48481667	48485616	+	0.880795
ENST00000479573.2	chr11	122921869	122922109	+	ENSG00000071082.5	ENST00000264258.3	chr2	101618177	101623729	+	0.825726
ENST00000402069.1	chr6	43506559	43507440	-	ENSG00000140988.8	ENST00000343262.3	chr16	2012062	2014861	-	0.961451
ENST00000484185.1	chr12	120397228	120397558	+	ENSG00000182899.10	ENST00000464167.1	chr3	197676858	197683481	+	0.885196
ENST00000418249.1	chr1	93396902	93397643	+	ENSG00000121211.3	ENST00000240488.3	chr4	154265801	154336270	+	0.863105
ENST00000448737.1	chrX	123338349	123339656	-	ENSG00000109971.8	ENST00000534624.1	chr11	122928197	122933043	-	0.845084
ENST00000461606.1	chr17	46768478	46769056	-	ENSG00000163682.10	ENST00000449470.2	chr4	39455757	39460508	-	0.939551
ENST00000418437.1	chr13	21834171	21835719	+	ENSG00000173153.9	ENST00000405666.1	chr11	64073699	64084215	+	0.907682
ENST00000432623.1	chr22	22583115	22584865	-	ENSG00000105176.11	ENST00000392271.1	chr19	30433158	30506611	+	0.677134
ENST00000523026.1	chr5	179684680	179685366	+	ENSG00000135747.7	ENST00000366503.2	chr1	247200086	247242057	-	0.768559
ENST00000447458.1	chrX	116533415	116534044	+	ENSG00000113649.6	ENST00000296702.5	chr5	145826875	145891524	+	0.861111
ENST00000463396.1	chr11	112332206	112332643	-	ENSG00000198242.7	ENST00000355731.4	chr17	27047317	27051010	+	0.80137
ENST00000401504.1	chr6	147728024	147729340	+	ENSG00000137693.8	ENST00000282441.5	chr11	101981192	102104154	+	0.931663
ENST00000426026.1	chr20	49237300	49237614	+	ENSG00000130255.6	ENST00000347512.2	chr19	5690272	5691674	+	0.892063
ENST00000395517.2	chr20	18465909	18466696	+	ENSG00000122026.6	ENST00000311549.6	chr13	27825446	27830705	+	0.953975
ENST00000434209.1	chr1	68841010	68841346	-	ENSG00000154582.11	ENST00000518127.1	chr8	74857354	74884522	-	0.922849
ENST00000435089.1	chrX	52736652	52738983	+	ENSG00000065154.7	ENST00000368845.5	chr10	126085876	126107505	-	0.909091
ENST00000420790.1	chr3	40364206	40364770	-	ENSG00000171314.6	ENST00000334828.5	chr10	99185917	99193198	+	0.837168
ENST00000441891.1	chr2	172349415	172349605	+	ENSG00000120686.7	ENST00000239878.4	chr13	38924018	38937140	+	0.91623
ENST00000456185.1	chr3	62912046	62912557	+	ENSG00000124614.9	ENST00000344700.3	chr6	34385231	34392998	-	0.894531
ENST00000399029.2	chr1	28446958	28447832	-	ENSG00000134108.7	ENST00000256496.3	chr3	5163905	5222596	+	0.958855
ENST00000429803.1	chr13	78996958	78997327	+	ENSG00000071082.5	ENST00000409711.1	chr2	101619153	101622829	+	0.82973
ENST00000489972.1	chr7	140135116	140135587	-	ENSG00000103202.7	ENST00000397722.1	chr16	446725	450746	+	0.800847
ENST00000494679.1	chr17	26982610	26982999	+	ENSG00000112306.7	ENST00000230050.3	chr6	133135580	133138703	+	0.851282
ENST00000443818.1	chr2	26363132	26364133	-	ENSG00000213853.4	ENST00000359543.3	chr16	10622279	10674555	-	0.917614
ENST00000428212.1	chr7	131387028	131387412	-	ENSG00000134419.9	ENST00000322989.4	chr16	18792617	18801656	-	0.880519
ENST00000407436.1	chr6	10574982	10575460	-	ENSG00000122026.6	ENST00000311549.6	chr13	27825446	27830705	+	0.929019
ENST00000503155.1	chr4	106600207	106601251	-	ENSG00000107625.6	ENST00000373585.3	chr10	70661034	70706603	+	0.937799
ENST00000434203.1	chr9	28598666	28599290	-	ENSG00000110906.8	ENST00000228495.6	chr12	109886461	109915349	-	0.7296
ENST00000538746.1	chr12	25588515	25589172	-	ENSG00000179083.5	ENST00000322139.4	chrX	92929012	92967273	+	0.761398
ENST00000529375.1	chr11	96513671	96514225	-	ENSG00000166971.9	ENST00000394657.4	chr16	53524952	53537163	-	0.832432
ENST00000402023.1	chr6	74328069	74328320	+	ENSG00000177954.7	ENST00000368567.4	chr1	153963235	153964626	+	0.93254
ENST00000437526.1	chr10	37233039	37233666	-	ENSG00000079277.13	ENST00000371946.4	chr1	47023090	47069886	-	0.91242
ENST00000416584.1	chr3	175785830	175786696	-	ENSG00000149547.9	ENST00000278903.6	chr11	125439298	125454574	+	0.831603
ENST00000467036.1	chr15	83041055	83041633	-	ENSG00000163682.10	ENST00000449470.2	chr4	39455757	39460508	-	0.998273
ENST00000506381.1	chr4	169519391	169519908	-	ENSG00000145741.10	ENST00000380591.3	chr5	72794274	72801460	+	0.69265
ENST00000402039.1	chr6	154897443	154898213	+	ENSG00000198034.6	ENST00000316084.6	chrX	71491892	71497150	-	0.935149
ENST00000425910.1	chrX	140474987	140475271	+	ENSG00000119013.4	ENST00000237889.4	chr2	201936462	201950473	+	0.891228
ENST00000514750.1	chr4	117347821	117352048	-	ENSG00000139842.10	ENST00000451881.1	chr13	113863086	113919391	+	0.754089
ENST00000424289.1	chr1	179969573	179969943	-	ENSG00000138326.12	ENST00000440692.1	chr10	79793518	79816570	+	0.851752
ENST00000428051.1	chrX	37805137	37806028	+	ENSG00000052802.8	ENST00000261507.6	chr4	166248775	166264312	+	0.86435
ENST00000512110.1	chr4	15494353	15494596	-	ENSG00000111640.8	ENST00000229239.5	chr12	6643093	6647537	+	0.913934
ENST00000520036.1	chr8	85860820	85861909	+	ENSG00000184009.2	ENST00000331925.1	chr17	79476999	79479827	-	0.782569
ENST00000533158.1	chr11	45535737	45536001	+	ENSG00000198830.6	ENST00000361427.5	chr1	26799010	26802463	+	0.890566
ENST00000468675.1	chr4	9564791	9565570	+	ENSG00000138326.12	ENST00000440692.1	chr10	79793518	79816570	+	0.765385
ENST00000454750.1	chr7	136848790	136849359	+	ENSG00000063177.6	ENST00000084795.4	chr19	49118591	49122433	-	0.892982
ENST00000455333.1	chr1	45245998	45246387	-	ENSG00000134419.9	ENST00000322989.4	chr16	18792617	18801656	-	0.966667
ENST00000507524.1	chr4	27586767	27587766	+	ENSG00000089289.11	ENST00000342206.6	chrX	69353299	69386174	+	0.894
ENST00000508621.1	chr4	165967121	165967432	+	ENSG00000124614.9	ENST00000344700.3	chr6	34385231	34392998	-	0.932692
ENST00000452936.1	chr2	131938726	131938942	-	ENSG00000007171.11	ENST00000313735.6	chr17	26083792	26127525	-	0.889401
ENST00000420409.1	chr1	203841702	203843315	-	ENSG00000170421.5	ENST00000293308.5	chr12	53290971	53298868	-	0.84318
ENST00000437728.1	chr7	97527659	97528427	-	ENSG00000145425.5	ENST00000514682.1	chr4	152020781	152025789	+	0.921977
ENST00000414066.1	chr10	38107534	38109910	-	ENSG00000146872.11	ENST00000346027.4	chr17	60556386	60692839	+	0.939732
ENST00000411983.1	chrY	5661341	5661778	-	ENSG00000161970.7	ENST00000293842.4	chr17	8280838	8286568	-	0.936073
ENST00000434499.1	chr1	225990850	225991155	+	ENSG00000143768.7	ENST00000420304.2	chr1	226124298	226129083	-	0.95098
ENST00000486836.1	chr3	157993598	157994210	-	ENSG00000174748.11	ENST00000307839.4	chr3	23958036	23962338	+	0.924959
ENST00000443064.1	chr1	78636145	78636998	-	ENSG00000189050.9	ENST00000305783.8	chr17	58029601	58042080	-	0.80445
ENST00000488873.1	chr3	155375549	155376401	+	ENSG00000089009.8	ENST00000424576.1	chr12	112842997	112847443	-	0.854742
ENST00000543613.1	chr11	73632710	73633241	-	ENSG00000111229.8	ENST00000228825.6	chr12	110872695	110888212	-	0.93609
ENST00000528022.1	chr11	82843098	82845779	+	ENSG00000116752.5	ENST00000369541.3	chr1	115110178	115124260	-	0.912975
ENST00000453253.1	chr13	97599891	97601181	-	ENSG00000078246.10	ENST00000535226.1	chr12	2986389	3046814	+	0.61038
ENST00000430535.1	chrX	149987226	149987719	+	ENSG00000196262.8	ENST00000489459.1	chr7	44836280	44841229	+	0.846154
ENST00000411430.1	chrX	122692201	122692435	+	ENSG00000189043.5	ENST00000339600.5	chr7	10971578	10979883	-	0.846809
ENST00000394974.2	chr1	58694354	58694675	-	ENSG00000167397.9	ENST00000533518.1	chr16	31094760	31105923	-	0.916149
ENST00000397318.3	chrX	40794238	40794969	-	ENSG00000140988.8	ENST00000343262.3	chr16	2012062	2014861	-	0.978142
ENST00000421835.1	chr2	87565634	87566193	+	ENSG00000243063.1	ENST00000390247.2	chr2	89277987	89278600	-	0.669643
ENST00000519826.1	chr8	26693334	26693817	-	ENSG00000126267.3	ENST00000246554.2	chr19	36139125	36149686	+	0.772727
ENST00000523156.1	chr8	138708967	138710710	+	ENSG00000166197.11	ENST00000405356.1	chr10	103911933	103923627	+	0.836009
ENST00000517342.1	chr8	57389385	57390546	-	ENSG00000186522.9	ENST00000356688.4	chr2	110300559	110371720	-	0.974182
ENST00000487972.1	chr15	34378112	34378515	-	ENSG00000144713.8	ENST00000429711.2	chr3	12875984	12883087	-	0.878713
ENST00000502532.1	chr5	21481436	21484120	-	ENSG00000196313.7	ENST00000395270.1	chr7	72349936	72421979	+	0.698324
ENST00000432501.1	chr13	19308220	19309036	+	ENSG00000185947.7	ENST00000300870.8	chr16	31885079	31928622	+	0.762546
ENST00000431514.1	chr1	21400063	21400246	-	ENSG00000109475.12	ENST00000506397.1	chr4	109541789	109546408	+	0.869565
ENST00000339867.4	chr6	34544035	34544433	-	ENSG00000142089.9	ENST00000270031.4	chr11	319737	320765	-	0.79198
ENST00000395082.2	chr9	139830292	139831613	+	ENSG00000156482.6	ENST00000523172.1	chr8	99054028	99057774	-	0.161876
ENST00000444678.1	chr1	218511883	218512098	+	ENSG00000197728.4	ENST00000356464.4	chr12	56435686	56438005	+	0.865741
ENST00000418882.2	chr12	27855271	27855839	+	ENSG00000164104.7	ENST00000296503.5	chr4	174252846	174256276	-	0.71529
ENST00000443152.1	chrY	26646410	26647652	-	ENSG00000234444.3	ENST00000423484.1	chr7	63774407	63809884	+	0.817377
ENST00000454475.1	chr2	74533855	74535135	-	ENSG00000111057.5	ENST00000388835.2	chr12	53342843	53346684	+	0.910226
ENST00000512037.1	chr4	103649948	103651328	-	ENSG00000135480.7	ENST00000331817.4	chr12	52626954	52642709	+	0.727734
ENST00000424882.1	chrX	27535887	27535998	-	ENSG00000137710.9	ENST00000343115.4	chr11	110100175	110167447	-	0.973214
ENST00000480485.1	chr12	8013032	8013360	+	ENSG00000008988.5	ENST00000519807.1	chr8	56979854	56987068	-	0.802432
ENST00000414016.1	chr2	222457161	222457581	+	ENSG00000125691.7	ENST00000479035.1	chr17	37004118	37010064	-	0.893112
ENST00000481669.1	chr3	75639449	75639800	-	ENSG00000149823.3	ENST00000279281.3	chr11	64863631	64879332	+	0.928977
ENST00000424978.1	chr2	95400401	95401589	-	ENSG00000172986.8	ENST00000389617.4	chr3	72937224	73026077	+	0.666947
ENST00000460661.1	chr6	7986770	7988425	+	ENSG00000143398.14	ENST00000349792.5	chr1	151171027	151222012	+	0.929348
ENST00000401543.2	chr9	90140217	90140390	+	ENSG00000213741.3	ENST00000245458.6	chr14	50050290	50053094	-	0.965517
ENST00000412038.1	chr1	114544055	114544860	-	ENSG00000142541.10	ENST00000391857.4	chr19	49990811	49995565	+	0.816467
ENST00000437203.1	chr13	92832968	92833138	-	ENSG00000164687.6	ENST00000297258.6	chr8	82192598	82197012	+	0.894737
ENST00000425840.2	chr5	84295738	84296113	-	ENSG00000196262.8	ENST00000468812.1	chr7	44836279	44842716	+	0.888298
ENST00000430569.1	chr7	3377758	3378233	+	ENSG00000122026.6	ENST00000311549.6	chr13	27825446	27830705	+	0.89916
ENST00000520062.1	chr8	108185428	108186037	-	ENSG00000164104.7	ENST00000296503.5	chr4	174252846	174256276	-	0.698361
ENST00000403708.1	chr6	88135513	88135806	-	ENSG00000197780.4	ENST00000338366.5	chr1	109606762	109618624	-	0.853741
ENST00000419509.1	chr7	132999763	133000167	-	ENSG00000134419.9	ENST00000322989.4	chr16	18792617	18801656	-	0.8
ENST00000535743.1	chr11	69070879	69071274	-	ENSG00000142089.9	ENST00000270031.4	chr11	319737	320765	-	0.79798
ENST00000469409.1	chr3	111197584	111197790	+	ENSG00000185883.4	ENST00000330398.4	chr16	2563871	2570219	+	0.869565
ENST00000419392.1	chrX	139553031	139553439	-	ENSG00000184779.7	ENST00000330339.7	chr15	82821158	82824972	-	0.816626
ENST00000403255.1	chr6	47720564	47720976	-	ENSG00000166441.8	ENST00000314138.6	chr11	8703958	8711419	+	0.866828
ENST00000474152.1	chr10	105005754	105006440	+	ENSG00000197713.9	ENST00000359429.6	chr2	210867289	210886300	+	0.975255
ENST00000461070.1	chr2	171608315	171609298	+	ENSG00000125977.6	ENST00000374980.2	chr20	32676104	32700138	-	0.988821
ENST00000419265.1	chr2	127927587	127927807	+	ENSG00000155438.6	ENST00000285814.4	chr2	122484521	122494499	-	0.850679
ENST00000419413.1	chrX	136523417	136523995	-	ENSG00000128340.10	ENST00000249071.6	chr22	37621301	37640310	-	0.761658
ENST00000466577.1	chr12	130701352	130701702	-	ENSG00000008988.5	ENST00000523936.1	chr8	56985632	56986915	-	0.80057
ENST00000456745.1	chrX	94865577	94865956	+	ENSG00000152795.12	ENST00000502762.1	chr4	83345782	83351294	-	0.678947
ENST00000450396.1	chr2	132795360	132795566	-	ENSG00000141068.8	ENST00000319524.6	chr17	25783670	25950717	+	0.94686
ENST00000425391.1	chr10	121829492	121829671	-	ENSG00000100316.11	ENST00000216146.4	chr22	39708889	39715776	-	0.877778
ENST00000481235.1	chr3	135644733	135645009	+	ENSG00000117118.5	ENST00000375499.3	chr1	17345217	17380665	-	0.906137
ENST00000376856.2	chr2	101125739	101126074	+	ENSG00000128989.4	ENST00000249822.3	chr15	52839432	52861213	-	0.934524
ENST00000466136.1	chr16	12175094	12175759	+	ENSG00000186468.8	ENST00000507980.1	chr5	81571697	81574173	-	0.788863
ENST00000448118.1	chr2	111725411	111726296	+	ENSG00000122406.6	ENST00000432788.1	chr1	93297597	93307480	+	0.937923
ENST00000528178.1	chr11	23453223	23453345	+	ENSG00000156313.7	ENST00000378505.2	chrX	38143662	38186797	-	0.943089
ENST00000442958.1	chr6	26864126	26865739	+	ENSG00000182356.5	ENST00000427789.2	chr22	18834061	18835942	+	0.820322
ENST00000513203.1	chr4	146545313	146547187	-	ENSG00000138293.14	ENST00000452682.1	chr10	51565108	51590731	+	0.921067
ENST00000473625.1	chr3	113950245	113951868	-	ENSG00000005238.13	ENST00000378566.1	chr9	35104109	35115847	-	0.700123
ENST00000494700.1	chr5	71677621	71678220	+	ENSG00000198755.6	ENST00000322203.6	chr6	35436185	35438562	+	0.79
ENST00000442568.1	chr9	139674391	139674664	+	ENSG00000136888.6	ENST00000374050.3	chr9	117350026	117360653	+	0.912409
ENST00000437248.1	chr1	241161751	241162094	-	ENSG00000137818.6	ENST00000260379.5	chr15	69745123	69748172	+	0.912791
ENST00000407885.1	chr6	25181532	25181952	+	ENSG00000109332.15	ENST00000343106.5	chr4	103717291	103748279	-	0.771971
ENST00000541161.1	chr12	23261392	23261427	-	ENSG00000173418.7	ENST00000398602.2	chr20	19998034	20014299	+	0.888889
ENST00000451614.1	chr7	138912283	138912574	-	ENSG00000197756.4	ENST00000491306.1	chr2	217362912	217368274	+	0.905455
ENST00000515413.1	chr4	29467343	29469473	-	ENSG00000078043.9	ENST00000398654.2	chr18	44392060	44497466	-	0.691537
ENST00000446233.1	chr2	153733334	153734281	+	ENSG00000135018.9	ENST00000376395.4	chr9	86274878	86323118	-	0.669831
ENST00000415580.1	chr1	106623379	106624001	-	ENSG00000105289.9	ENST00000382008.3	chr19	3721735	3750807	+	0.929374
ENST00000419793.1	chr9	67789549	67789882	+	ENSG00000231997.1	ENST00000426006.1	chr9	46390277	46390685	+	0.973054
ENST00000413906.1	chr14	107139422	107140367	-	ENSG00000144136.5	ENST00000272542.3	chr2	113403434	113421404	+	0.801268
ENST00000481703.1	chr12	17274650	17275391	+	ENSG00000147604.9	ENST00000396467.1	chr8	74202519	74205868	-	0.830189
ENST00000392251.3	chr12	66669720	66670431	-	ENSG00000115539.9	ENST00000450127.1	chr2	101185417	101188502	+	0.668539
ENST00000446487.1	chr22	18585223	18586415	-	ENSG00000102931.2	ENST00000219204.2	chr16	57279010	57287547	+	0.79096
ENST00000425026.1	chrY	10027986	10029907	-	ENSG00000004897.4	ENST00000066544.3	chr17	45195069	45266632	-	0.944329
ENST00000537929.1	chr12	4744515	4745306	-	ENSG00000144566.5	ENST00000273047.4	chr3	19988571	20026667	+	0.922345
ENST00000448545.1	chr10	31207941	31210164	-	ENSG00000178105.4	ENST00000456020.1	chr11	108535804	108811656	+	0.765649
ENST00000456658.1	chr20	32989955	32990502	-	ENSG00000070831.11	ENST00000315554.8	chr1	22379182	22417297	+	0.906934
ENST00000450604.1	chrX	67694552	67696716	+	ENSG00000166579.10	ENST00000380025.3	chr17	8339179	8371469	+	0.869951
ENST00000406100.1	chr6	58263735	58266381	+	ENSG00000182356.5	ENST00000427789.2	chr22	18834061	18835942	+	0.805365
ENST00000538799.1	chr12	2861763	2862298	-	ENSG00000120645.7	ENST00000326261.4	chr12	176049	287620	+	0.839552
ENST00000492327.1	chr11	108561016	108561683	-	ENSG00000140988.8	ENST00000343262.3	chr16	2012062	2014861	-	0.791916
ENST00000444843.1	chr7	51454060	51454798	-	ENSG00000215153.2	ENST00000399699.2	chr10	38737272	38741080	+	0.941813
ENST00000448648.1	chr10	27535279	27540722	-	ENSG00000238083.2	ENST00000333412.3	chr17	44590076	44633016	+	0.852668
ENST00000502787.1	chr5	180098892	180099598	-	ENSG00000110104.5	ENST00000227520.5	chr11	60609544	60618554	+	0.818953
ENST00000496370.1	chr5	68765710	68765963	+	ENSG00000177954.7	ENST00000368567.4	chr1	153963235	153964626	+	0.925197
ENST00000424050.1	chr9	66345261	66346161	+	ENSG00000064666.6	ENST00000263097.1	chr19	1026298	1039060	+	0.884573
ENST00000397758.2	chr3	175436019	175436458	-	ENSG00000244687.3	ENST00000340309.3	chr20	48697661	48732491	-	0.972727
ENST00000441721.1	chrX	143392257	143392818	+	ENSG00000171848.7	ENST00000304567.4	chr2	10262455	10271545	+	0.864769
ENST00000435889.1	chr10	69720459	69721221	-	ENSG00000145425.5	ENST00000514682.1	chr4	152020781	152025789	+	0.861075
ENST00000510683.1	chr4	121012204	121013416	-	ENSG00000135521.8	ENST00000367576.5	chr6	144164481	144184949	+	0.774938
ENST00000435269.1	chr3	174095034	174095795	+	ENSG00000161016.9	ENST00000262584.3	chr8	146015155	146017972	-	0.901575
ENST00000514930.1	chr5	82120703	82121003	+	ENSG00000125534.4	ENST00000370179.3	chr20	62152077	62153559	+	0.737542
ENST00000411806.1	chr2	217021065	217021534	-	ENSG00000170734.7	ENST00000372236.4	chr6	43543887	43583397	+	0.923404
ENST00000406475.1	chr6	65341098	65341575	-	ENSG00000138668.13	ENST00000514671.1	chr4	83274987	83280792	-	0.807531
ENST00000485633.1	chr12	121354548	121355039	+	ENSG00000197958.8	ENST00000361436.5	chr9	130209953	130213684	-	0.945122
ENST00000423021.1	chr9	5110913	5112842	+	ENSG00000071564.8	ENST00000262965.4	chr19	1609293	1652326	-	0.887047
ENST00000445475.1	chr2	35696782	35696907	+	ENSG00000145907.9	ENST00000394123.3	chr5	151151471	151192346	+	0.896825
ENST00000397627.3	chr5	118309491	118309817	+	ENSG00000187514.9	ENST00000409115.3	chr2	232573219	232578251	+	0.990826
ENST00000431546.1	chr11	3105623	3106673	-	ENSG00000129084.11	ENST00000530457.1	chr11	14526459	14541909	-	0.784932
ENST00000437347.1	chr22	17997708	17998061	-	ENSG00000086061.10	ENST00000330899.4	chr9	33025209	33039905	+	0.847458
ENST00000439300.1	chrX	134717576	134719085	-	ENSG00000157557.7	ENST00000360214.3	chr21	40177231	40196879	+	0.828212
ENST00000425129.1	chr16	11120881	11121618	+	ENSG00000146223.9	ENST00000493763.1	chr6	42847373	42857634	+	0.97019
ENST00000417429.1	chr9	79585238	79585944	+	ENSG00000011009.5	ENST00000374514.3	chr1	24117460	24122029	+	0.866319
ENST00000425885.1	chrX	70633684	70633936	-	ENSG00000177105.9	ENST00000351018.4	chr11	3848208	3862213	-	0.747036
ENST00000534629.1	chr15	43231508	43232556	-	ENSG00000160752.10	ENST00000356657.6	chr1	155278707	155290456	+	0.906578
ENST00000503460.1	chr4	28824866	28825833	-	ENSG00000106484.8	ENST00000223215.4	chr7	130131934	130146133	+	0.928719
ENST00000476081.1	chr14	105840955	105841308	+	ENSG00000008988.5	ENST00000519807.1	chr8	56979854	56987068	-	0.782486
ENST00000469001.1	chr17	27129468	27129842	+	ENSG00000071082.5	ENST00000409711.1	chr2	101619153	101622829	+	0.869333
ENST00000471402.1	chr17	74426499	74427206	-	ENSG00000147604.9	ENST00000396467.1	chr8	74202519	74205868	-	0.871469
ENST00000509378.1	chr4	165109463	165111519	+	ENSG00000044574.6	ENST00000324460.6	chr9	127997132	128003609	-	0.926592
ENST00000508655.1	chr4	130054780	130055247	+	ENSG00000197927.7	ENST00000355171.4	chr2	132479948	132524973	+	0.852564
ENST00000418887.1	chr2	26901087	26901378	-	ENSG00000145592.9	ENST00000274242.5	chr5	40825364	40835437	-	0.914384
ENST00000458382.1	chrX	53795489	53795717	-	ENSG00000110700.2	ENST00000228140.2	chr11	17095936	17099213	-	0.855895
ENST00000488313.1	chr14	55749014	55749361	-	ENSG00000109475.12	ENST00000394668.2	chr4	109541812	109551568	+	0.83908
ENST00000526444.1	chr11	26067534	26069145	+	ENSG00000159593.7	ENST00000379463.2	chr16	66836783	66864879	-	0.803479
ENST00000423174.1	chr3	177014949	177016174	-	ENSG00000130707.11	ENST00000372394.1	chr9	133320349	133376661	+	0.915171
ENST00000455497.1	chr1	173710813	173711062	+	ENSG00000177954.7	ENST00000368567.4	chr1	153963235	153964626	+	0.96
ENST00000413933.1	chr21	20616860	20618709	+	ENSG00000131389.12	ENST00000454876.2	chr3	14444076	14530857	+	0.888649
ENST00000511402.1	chr5	180409273	180409611	+	ENSG00000128989.4	ENST00000249822.3	chr15	52839432	52861213	-	0.946903
ENST00000427780.1	chr1	249065834	249067991	-	ENSG00000156162.12	ENST00000414645.2	chr8	95732128	95806064	+	0.898054
ENST00000449233.1	chr9	110616064	110616539	-	ENSG00000140264.14	ENST00000381359.1	chr15	44069298	44086793	+	0.875706
ENST00000428431.1	chrX	63946628	63946928	-	ENSG00000196072.6	ENST00000358848.1	chr10	102033713	102046439	-	0.877076
ENST00000544546.1	chr12	14344936	14345218	+	ENSG00000205581.6	ENST00000380747.1	chr21	40714805	40721573	-	0.809187
ENST00000507651.1	chr4	165947413	165948096	-	ENSG00000176979.8	ENST00000341062.5	chr4	165960350	165962665	+	0.682749
ENST00000429380.1	chr3	172240018	172240234	+	ENSG00000028839.4	ENST00000237264.3	chr6	134274333	134308637	+	0.940092
ENST00000419150.1	chr1	120880883	120881272	+	ENSG00000116251.5	ENST00000234875.4	chr1	6245080	6259672	-	0.894872
ENST00000461163.1	chr11	74449534	74449841	-	ENSG00000241343.2	ENST00000427805.2	chrX	100645812	100651105	+	0.873377
ENST00000525414.1	chr11	109920253	109920885	+	ENSG00000099817.6	ENST00000215587.6	chr19	1086578	1095391	-	0.919431
ENST00000422502.1	chr7	62723443	62723834	+	ENSG00000142252.5	ENST00000270257.3	chr19	45582530	45594782	+	0.82398
ENST00000406185.1	chr6	43277969	43278095	+	ENSG00000197958.8	ENST00000361436.5	chr9	130209953	130213684	-	0.952756
ENST00000434165.1	chr20	17579900	17580452	-	ENSG00000177105.9	ENST00000351018.4	chr11	3848208	3862213	-	0.699819
ENST00000530976.1	chr11	82751848	82752445	-	ENSG00000147403.12	ENST00000424325.2	chrX	153626571	153630680	+	0.842657
ENST00000412447.1	chr9	84025194	84025545	+	ENSG00000008988.5	ENST00000519807.1	chr8	56979854	56987068	-	0.8125
ENST00000506277.1	chr5	36885308	36886599	+	ENSG00000111057.5	ENST00000388835.2	chr12	53342843	53346684	+	0.904799
ENST00000397754.2	chr9	5418373	5418976	-	ENSG00000176641.5	ENST00000312828.3	chr18	59475296	59560992	-	0.907285
ENST00000420768.1	chr22	22577580	22578959	-	ENSG00000100038.14	ENST00000357179.5	chr22	22311397	22337213	-	0.812319
ENST00000449911.1	chrX	113625127	113625711	+	ENSG00000160075.9	ENST00000291386.3	chr1	1477053	1510249	-	0.849573
ENST00000532177.1	chr11	118692604	118692793	+	ENSG00000127184.6	ENST00000247655.3	chr5	85913721	85916779	+	0.815789
ENST00000392510.2	chr14	106138648	106139651	-	ENSG00000126767.11	ENST00000247161.3	chrX	47494920	47509887	-	0.916335
ENST00000443086.1	chr1	24890091	24890457	+	ENSG00000161970.7	ENST00000293842.4	chr17	8280838	8286568	-	0.820163
ENST00000405035.1	chrY	3719265	3720910	-	ENSG00000244476.2	ENST00000472091.1	chr6	11102722	11111965	-	0.791616
ENST00000426913.1	chr14	54383988	54384471	-	ENSG00000198242.7	ENST00000422514.2	chr17	27046411	27051377	+	0.756198
ENST00000485426.1	chr3	113569084	113569578	-	ENSG00000124614.9	ENST00000344700.3	chr6	34385231	34392998	-	0.957576
ENST00000504616.1	chr8	95214141	95215280	-	ENSG00000089009.8	ENST00000424576.1	chr12	112842997	112847443	-	0.853541
ENST00000479473.1	chr17	25607508	25607938	+	ENSG00000105193.3	ENST00000339471.3	chr19	39923852	39926576	-	0.842227
ENST00000369171.2	chr1	197715879	197716581	-	ENSG00000165669.7	ENST00000369183.4	chr10	120065401	120101832	-	0.930299
ENST00000465482.1	chr3	127002924	127003524	-	ENSG00000204918.2	ENST00000377930.1	chr13	57721622	57724643	+	0.768719
ENST00000513953.1	chr8	97080957	97081909	-	ENSG00000111640.8	ENST00000229239.5	chr12	6643093	6647537	+	0.83106
ENST00000485147.1	chr12	117193200	117193679	-	ENSG00000122026.6	ENST00000311549.6	chr13	27825446	27830705	+	0.964583
ENST00000510239.1	chr4	72300122	72303494	-	ENSG00000134333.7	ENST00000540430.1	chr11	18417813	18429765	+	0.727545
ENST00000402426.2	chr6	73764820	73765580	+	ENSG00000171314.6	ENST00000334828.5	chr10	99185917	99193198	+	0.918528
ENST00000414338.1	chr1	68026756	68027118	+	ENSG00000090621.8	ENST00000421687.2	chr1	40027359	40038156	-	0.837466
ENST00000492841.1	chr3	141427858	141428674	-	ENSG00000133112.12	ENST00000530705.1	chr13	45911313	45915505	-	0.853516
ENST00000438037.1	chr22	22774663	22775647	+	ENSG00000129691.9	ENST00000250635.7	chr8	37963011	37997225	+	0.79797
ENST00000413233.1	chr7	116612219	116612965	-	ENSG00000143549.13	ENST00000368533.3	chr1	154127784	154155648	-	0.930388
ENST00000507235.1	chr5	144608374	144609617	+	ENSG00000130707.11	ENST00000443588.1	chr9	133327610	133346901	+	0.404341
ENST00000396562.2	chr7	64027192	64027821	-	ENSG00000101951.12	ENST00000218068.6	chrX	49593906	49598576	+	0.822222
ENST00000509955.1	chr4	13978790	13979652	+	ENSG00000136819.8	ENST00000372447.3	chr9	132589569	132597554	-	0.853998
ENST00000423039.1	chr7	7781722	7782166	-	ENSG00000198242.7	ENST00000422514.2	chr17	27046411	27051377	+	0.894382
ENST00000418418.1	chr17	19743439	19743828	+	ENSG00000065518.7	ENST00000485064.1	chr3	120315175	120321171	+	0.897436
ENST00000507315.1	chr8	9311208	9314928	+	ENSG00000174485.8	ENST00000539602.1	chr15	66020161	66023768	-	0.0412776
ENST00000517826.1	chr8	48109655	48109946	-	ENSG00000169575.4	ENST00000403807.3	chr22	22599087	22599927	+	0.708904
ENST00000426627.1	chr13	88542427	88544727	-	ENSG00000138336.7	ENST00000373644.4	chr10	70320413	70454239	+	0.82399
ENST00000542164.1	chr12	123234028	123234133	-	ENSG00000214960.5	ENST00000399310.3	chr7	16130817	16460947	-	0.90566
ENST00000411665.1	chr3	174020734	174021077	-	ENSG00000110200.4	ENST00000543050.1	chr11	71818205	71822489	-	0.825581
ENST00000434567.1	chr13	23947562	23948155	+	ENSG00000137818.6	ENST00000260379.5	chr15	69745123	69748172	+	0.850394
ENST00000320371.6	chr21	30369934	30370354	-	ENSG00000125691.7	ENST00000394332.1	chr17	37004118	37009975	-	0.926366
ENST00000414981.1	chr9	31644578	31645158	-	ENSG00000029993.10	ENST00000455596.1	chrX	150151858	150156365	+	0.822719
ENST00000423396.1	chr20	45492202	45492743	-	ENSG00000167526.8	ENST00000393099.3	chr16	89627119	89630950	+	0.774908
ENST00000438591.1	chr10	70921286	70921662	-	ENSG00000112306.7	ENST00000230050.3	chr6	133135580	133138703	+	0.904509
ENST00000470828.1	chr3	64160077	64160823	+	ENSG00000165672.5	ENST00000298510.2	chr10	120927222	120938345	-	0.846051
ENST00000406003.2	chr12	10264337	10265070	+	ENSG00000197451.6	ENST00000358344.3	chr5	177631508	177638164	+	0.925068
ENST00000445368.1	chr20	31635323	31635958	-	ENSG00000130021.8	ENST00000381077.5	chrX	6966961	7066231	-	0.822327
ENST00000512350.1	chr5	26669820	26670098	-	ENSG00000167522.8	ENST00000301030.3	chr16	89334035	89556969	-	0.913978
ENST00000423038.1	chrX	47132765	47133789	-	ENSG00000145029.6	ENST00000273598.3	chr3	49460379	49466759	-	0.935433
ENST00000416141.1	chr1	146890786	146891588	+	ENSG00000186943.1	ENST00000335040.1	chr9	107331449	107332411	+	0.581569
ENST00000432629.1	chr20	53691183	53691679	+	ENSG00000197958.8	ENST00000361436.5	chr9	130209953	130213684	-	0.987928
ENST00000457231.1	chr7	124673507	124675355	+	ENSG00000254772.2	ENST00000378019.3	chr11	62327075	62342401	-	0.909931
ENST00000447135.2	chr4	174537087	174538057	-	ENSG00000185787.9	ENST00000331268.4	chr15	79165211	79190475	+	0.963955
ENST00000471205.1	chr5	133758529	133759026	+	ENSG00000124614.9	ENST00000344700.3	chr6	34385231	34392998	-	0.927711
ENST00000495419.1	chr5	13250347	13250774	-	ENSG00000186468.8	ENST00000296674.8	chr5	81569177	81574396	-	0.836449
ENST00000448912.1	chr2	181803557	181804025	-	ENSG00000166441.8	ENST00000314138.6	chr11	8703958	8711419	+	0.850746
ENST00000427602.1	chr22	16886056	16886143	+	ENSG00000145354.4	ENST00000273986.4	chr4	103790135	103810399	+	1
ENST00000439497.1	chr2	243062007	243062204	-	ENSG00000079432.1	ENST00000160740.1	chr19	42788817	42799949	+	0.873737
ENST00000407020.1	chr6	81179788	81180145	-	ENSG00000168028.8	ENST00000458478.1	chr3	39448224	39453550	+	0.840782
ENST00000416536.1	chr3	37185003	37185449	-	ENSG00000184182.12	ENST00000272930.4	chr2	238875597	238951236	+	0.885906
ENST00000497538.1	chr3	155705093	155705965	+	ENSG00000119335.11	ENST00000372692.4	chr9	131445934	131458679	+	0.983963
ENST00000490023.1	chr14	103878456	103879098	-	ENSG00000198755.6	ENST00000322203.6	chr6	35436185	35438562	+	0.908243
ENST00000489560.1	chr14	61068864	61069251	-	ENSG00000134419.9	ENST00000322989.4	chr16	18792617	18801656	-	0.889175
ENST00000460778.1	chr8	135991070	135991522	-	ENSG00000198242.7	ENST00000422514.2	chr17	27046411	27051377	+	0.763797
ENST00000443827.1	chr2	63346146	63346398	-	ENSG00000155368.12	ENST00000311521.4	chr2	120124646	120130122	+	0.679842
ENST00000425870.1	chr7	67234616	67235455	-	ENSG00000101132.5	ENST00000371419.2	chr20	52824386	52836492	+	0.78487
ENST00000432681.1	chr3	659472	659997	-	ENSG00000168028.8	ENST00000301821.5	chr3	39448180	39453929	+	0.874525
ENST00000526512.1	chr11	107047012	107048256	+	ENSG00000130707.11	ENST00000372394.1	chr9	133320349	133376661	+	0.929317
ENST00000443069.1	chr9	38452786	38454067	-	ENSG00000114098.12	ENST00000481646.1	chr3	137906109	138015391	+	0.911856
ENST00000411602.1	chr10	34952787	34953029	-	ENSG00000145592.9	ENST00000508493.1	chr5	40833981	40835314	-	0.794239
ENST00000422058.1	chrX	101960712	101961168	+	ENSG00000165626.11	ENST00000378605.3	chr10	13483355	13544945	-	0.842451
ENST00000416091.1	chr2	201966812	201967680	-	ENSG00000215472.3	ENST00000418495.1	chr18	47014858	47018906	-	0.836036
ENST00000395823.2	chr22	26956492	26957054	+	ENSG00000189403.9	ENST00000326004.4	chr13	31035633	31040075	-	0.912966
ENST00000454576.1	chr9	110296671	110297443	+	ENSG00000105193.3	ENST00000339471.3	chr19	39923852	39926576	-	0.836735
ENST00000479243.1	chr8	48068741	48069394	+	ENSG00000198755.6	ENST00000322203.6	chr6	35436185	35438562	+	0.961774
ENST00000518368.1	chr5	179512717	179514038	-	ENSG00000056050.6	ENST00000393381.2	chr4	170650616	170679104	-	0.920197
ENST00000443486.1	chr21	15164956	15165462	+	ENSG00000160256.8	ENST00000291634.6	chr21	46359925	46396904	+	0.956607
ENST00000417716.1	chr1	197191352	197192385	+	ENSG00000182220.8	ENST00000378438.4	chrX	40440160	40465889	+	0.928433
ENST00000415916.1	chr2	133668669	133668834	-	ENSG00000106028.6	ENST00000481508.1	chr7	141438407	141450261	+	0.849398
ENST00000414800.1	chr2	96307382	96307728	-	ENSG00000064309.10	ENST00000534661.1	chr11	125873801	125891417	-	0.809798
ENST00000452760.1	chr17	20515995	20517321	+	ENSG00000140995.10	ENST00000268676.7	chr16	90015183	90034468	+	0.955539
ENST00000435260.1	chr8	56962597	56963766	-	ENSG00000100519.5	ENST00000445930.2	chr14	53173890	53195305	+	0.982906
ENST00000440214.1	chr2	62047343	62047701	+	ENSG00000135486.10	ENST00000340913.5	chr12	54674488	54679028	+	0.922006
ENST00000415696.1	chr13	113784730	113786368	+	ENSG00000065427.8	ENST00000319410.5	chr16	75661622	75681563	-	0.799878
ENST00000525251.1	chr11	56557682	56558441	-	ENSG00000174957.1	ENST00000312298.1	chr11	55944094	55945032	+	0.607895
ENST00000527787.1	chr8	11952688	11952856	-	ENSG00000184276.2	ENST00000328698.1	chr11	71544246	71548608	+	0.970414
ENST00000541449.1	chr12	10983673	10984615	-	ENSG00000121377.2	ENST00000240687.2	chr12	10954131	10955226	-	0.604454
ENST00000448875.1	chr14	99439651	99439808	+	ENSG00000100316.11	ENST00000216146.4	chr22	39708889	39715776	-	1
ENST00000444107.1	chr1	32867710	32868716	-	ENSG00000111640.8	ENST00000229239.5	chr12	6643093	6647537	+	0.830189
ENST00000524415.1	chr8	11647514	11647895	+	ENSG00000113387.6	ENST00000265073.4	chr5	32585605	32604185	+	0.963351
ENST00000394891.3	chr9	110802494	110802873	+	ENSG00000071082.5	ENST00000264258.3	chr2	101618177	101623729	+	0.871053
ENST00000445357.1	chr9	139707240	139709988	-	ENSG00000115053.10	ENST00000392033.4	chr2	232319462	232329195	-	0.756495
ENST00000424782.1	chrX	148898832	148899306	+	ENSG00000128951.6	ENST00000331200.2	chr15	48623621	48635570	+	0.804211
ENST00000453325.1	chrX	43266928	43267809	-	ENSG00000111704.6	ENST00000229307.4	chr12	7941992	7948655	+	0.931973
ENST00000418695.1	chr22	39118748	39119510	-	ENSG00000165672.5	ENST00000298510.2	chr10	120927222	120938345	-	0.93578
ENST00000438427.1	chr7	39608975	39609797	-	ENSG00000139921.7	ENST00000457354.1	chr14	51706886	51724370	+	0.930741
ENST00000449535.2	chr13	21932512	21933453	+	ENSG00000111640.8	ENST00000229239.5	chr12	6643093	6647537	+	0.801486
ENST00000440222.1	chr20	40011023	40011747	+	ENSG00000197056.5	ENST00000373329.1	chr1	35544992	35581455	+	0.675862
ENST00000404577.1	chr6	167622119	167622385	-	ENSG00000112494.5	ENST00000230256.3	chr6	167704803	167729507	+	0.981273
ENST00000437270.1	chr9	140535438	140535999	-	ENSG00000119335.11	ENST00000372692.4	chr9	131445934	131458679	+	0.8879
ENST00000423940.1	chr1	118320709	118321128	-	ENSG00000189266.6	ENST00000334351.7	chr1	24286302	24289952	+	0.988095
ENST00000429428.1	chrX	48088268	48088394	-	ENSG00000163191.5	ENST00000271638.2	chr1	152004982	152009511	-	0.84252
ENST00000493002.1	chr15	80044029	80044391	-	ENSG00000112306.7	ENST00000230050.3	chr6	133135580	133138703	+	0.859504
ENST00000487216.1	chr19	21416137	21416454	+	ENSG00000241343.2	ENST00000427805.2	chrX	100645812	100651105	+	0.946541
ENST00000405943.2	chrX	130780647	130780899	+	ENSG00000143321.13	ENST00000357325.5	chr1	156711899	156721536	-	0.928854
ENST00000426339.1	chr10	98319942	98320679	+	ENSG00000181163.9	ENST00000393820.2	chr5	170814855	170834129	+	0.945799
ENST00000454899.1	chrX	130753023	130753911	+	ENSG00000171054.6	ENST00000338616.3	chrX	130677950	130679030	+	0.608549
ENST00000445584.1	chr2	62788193	62788558	-	ENSG00000137876.4	ENST00000260443.4	chr15	55473004	55489265	-	0.92623
ENST00000456500.1	chr2	38044058	38045104	+	ENSG00000023734.6	ENST00000419869.2	chr12	16035329	16056412	+	0.948424
ENST00000435770.1	chr9	110596790	110597110	-	ENSG00000241343.2	ENST00000427805.2	chrX	100645812	100651105	+	0.859813
ENST00000441468.1	chr9	44877290	44877647	+	ENSG00000231997.1	ENST00000426006.1	chr9	46390277	46390685	+	0.851955
ENST00000421309.1	chr1	68847124	68847340	-	ENSG00000105829.6	ENST00000222547.3	chr7	93622554	93633687	-	0.870968
ENST00000401900.1	chr6	10514515	10515206	+	ENSG00000187210.8	ENST00000442371.1	chr9	79056582	79122330	+	0.799133
ENST00000346911.4	chr17	15686602	15687621	+	ENSG00000134352.14	ENST00000381298.1	chr5	55230923	55290772	-	0.969608
ENST00000415639.1	chr22	23330438	23330756	+	ENSG00000154723.8	ENST00000400093.3	chr21	27096791	27107984	-	0.946708
ENST00000437151.1	chr6	87680184	87680911	+	ENSG00000147604.9	ENST00000396467.1	chr8	74202519	74205868	-	0.869505
ENST00000452821.1	chr10	65662211	65663005	-	ENSG00000148303.12	ENST00000323345.6	chr9	136215069	136218281	+	0.958491
ENST00000401075.2	chr1	31960438	31961608	-	ENSG00000156508.12	ENST00000316292.9	chr6	74225473	74230741	-	0.865073
ENST00000512696.1	chr4	45416354	45416927	-	ENSG00000174444.7	ENST00000307961.5	chr15	66790801	66797221	-	0.83101
ENST00000446711.1	chrX	90815437	90816597	-	ENSG00000142864.10	ENST00000361219.6	chr1	67878068	67896082	-	0.828596
ENST00000495857.1	chr5	145518334	145518571	+	ENSG00000182899.10	ENST00000464167.1	chr3	197676858	197683481	+	0.911765
ENST00000415694.1	chr9	109931850	109933429	-	ENSG00000182481.3	ENST00000537025.1	chr17	66032335	66042958	+	0.91519
ENST00000414918.1	chr9	67864636	67864981	+	ENSG00000147403.12	ENST00000369817.2	chrX	153625495	153629258	+	0.751445
ENST00000508637.1	chr4	115025094	115025379	+	ENSG00000122026.6	ENST00000311549.6	chr13	27825446	27830705	+	0.776978
ENST00000358778.4	chr2	87112198	87112854	-	ENSG00000197728.4	ENST00000356464.4	chr12	56435686	56438005	+	0.590563
ENST00000432923.1	chr1	99929934	99930334	+	ENSG00000162384.7	ENST00000294360.4	chr1	53679771	53686289	-	0.830424
ENST00000427368.1	chrX	71009236	71009486	-	ENSG00000189043.5	ENST00000339600.5	chr7	10971578	10979883	-	0.772908
ENST00000443195.1	chr1	20852482	20853244	+	ENSG00000198034.6	ENST00000316084.6	chrX	71491892	71497150	-	0.883355
ENST00000403775.1	chr6	86796133	86796852	-	ENSG00000147604.9	ENST00000396467.1	chr8	74202519	74205868	-	0.929167
ENST00000490376.1	chr7	6940055	6940254	-	ENSG00000166979.8	ENST00000401402.3	chr21	33784993	33887707	+	0.98
ENST00000428586.1	chr3	32071688	32072170	+	ENSG00000122026.6	ENST00000311549.6	chr13	27825446	27830705	+	0.923395
ENST00000440580.1	chr9	69451764	69452598	+	ENSG00000178996.8	ENST00000343017.6	chr5	53813589	53842415	+	0.785629
ENST00000524483.1	chr8	11777409	11778318	-	ENSG00000237521.1	ENST00000456448.1	chr19	9361606	9362820	+	0.831868
ENST00000434892.1	chr20	51127791	51128107	+	ENSG00000090263.10	ENST00000393008.3	chr7	140705854	140714479	-	0.760252
ENST00000480271.1	chr11	7805244	7805954	+	ENSG00000148303.12	ENST00000323345.6	chr9	136215069	136218281	+	0.919831
ENST00000456143.1	chr22	16404698	16405874	+	ENSG00000157216.10	ENST00000371320.3	chr1	54692305	54872092	-	0.930331
ENST00000454624.1	chr7	29724389	29724808	-	ENSG00000180233.7	ENST00000323037.4	chr7	30323923	30407308	+	0.919048
ENST00000524544.1	chr11	80364473	80365032	-	ENSG00000170540.7	ENST00000304414.6	chr16	18802991	18812917	-	0.939286
ENST00000405027.1	chr6	3978296	3979333	+	ENSG00000108010.7	ENST00000331244.5	chr10	131934663	131977888	+	0.894027
ENST00000440965.1	chr2	202002239	202004750	-	ENSG00000178035.6	ENST00000326739.4	chr3	49061758	49066823	-	0.719844
ENST00000396646.3	chr3	25796416	25797161	+	ENSG00000187325.4	ENST00000341864.5	chrX	77385245	77395203	-	0.941019
ENST00000512176.1	chr3	133209668	133210349	+	ENSG00000179632.5	ENST00000322428.5	chr8	145159402	145162514	+	0.85044
ENST00000495560.2	chr8	36845495	36845930	-	ENSG00000161970.7	ENST00000293842.4	chr17	8280838	8286568	-	0.866972
ENST00000448529.1	chr9	92994467	92995423	+	ENSG00000237521.1	ENST00000456448.1	chr19	9361606	9362820	+	0.846395
ENST00000514059.1	chr8	125932670	125934318	+	ENSG00000124532.9	ENST00000378386.3	chr6	24403182	24425810	+	0.900651
ENST00000427731.1	chr1	109589448	109590105	+	ENSG00000132341.5	ENST00000392367.3	chr12	131356641	131360508	+	0.889058
ENST00000489113.2	chr3	143222117	143223115	-	ENSG00000111640.8	ENST00000229239.5	chr12	6643093	6647537	+	0.844845
ENST00000430003.1	chr2	204499300	204500739	-	ENSG00000010244.10	ENST00000394670.3	chr17	30677150	30708905	+	0.898611
ENST00000425440.1	chr3	168576447	168576918	-	ENSG00000122026.6	ENST00000311549.6	chr13	27825446	27830705	+	0.879237
ENST00000423931.1	chr3	192873245	192874997	-	ENSG00000136451.3	ENST00000258963.2	chr17	56048910	56065615	-	0.963011
ENST00000518923.1	chr5	109220311	109221124	-	ENSG00000247077.2	ENST00000498926.2	chr12	133287405	133299228	+	0.813268
ENST00000424695.1	chr1	238654658	238655944	+	ENSG00000111057.5	ENST00000388835.2	chr12	53342843	53346684	+	0.912976
ENST00000413190.1	chr21	21802755	21803074	-	ENSG00000145425.5	ENST00000509736.1	chr4	152020776	152025789	+	0.88125
ENST00000439897.1	chr1	92065728	92065878	+	ENSG00000198918.6	ENST00000361575.3	chrX	118920469	118925606	-	0.933775
ENST00000339579.4	chr6	34991297	34991592	+	ENSG00000115541.6	ENST00000233893.5	chr2	198364718	198368181	+	0.908784
ENST00000497682.1	chr3	109128525	109128931	-	ENSG00000132475.3	ENST00000254810.3	chr17	73772517	73775860	-	0.732187
ENST00000435088.1	chr10	71060188	71060573	-	ENSG00000134419.9	ENST00000322989.4	chr16	18792617	18801656	-	0.92228
ENST00000420617.1	chr22	19874812	19875493	+	ENSG00000161016.9	ENST00000262584.3	chr8	146015155	146017972	-	0.759531
ENST00000248151.4	chr8	30209524	30210858	+	ENSG00000196230.7	ENST00000327892.8	chr6	30687978	30693203	+	0.973783
ENST00000480448.1	chr3	100881938	100882830	+	ENSG00000133627.12	ENST00000256001.8	chr7	152456834	152552463	+	0.709966
ENST00000489251.1	chr14	76062148	76062549	-	ENSG00000138326.12	ENST00000435275.1	chr10	79793518	79800471	+	0.952736
ENST00000447169.1	chrX	45772553	45773306	+	ENSG00000124193.9	ENST00000244020.3	chr20	42086568	42092245	+	0.903183
ENST00000445390.1	chr6	10460139	10460774	-	ENSG00000175581.9	ENST00000310614.7	chr11	73498361	73575656	+	0.937107
ENST00000426077.1	chr2	120979500	120980552	-	ENSG00000155984.8	ENST00000316916.8	chrX	148678216	148713568	-	0.802469
ENST00000418141.1	chr17	20492606	20493682	+	ENSG00000105419.9	ENST00000331559.3	chr19	47906392	47922785	-	0.965645
ENST00000513074.1	chr4	91604061	91604274	+	ENSG00000145839.1	ENST00000274520.1	chr5	135227935	135231516	-	0.817757
ENST00000378718.2	chr13	44542560	44545335	+	ENSG00000149091.10	ENST00000343674.6	chr11	46354455	46402104	+	0.980908
ENST00000432262.1	chr9	65496525	65496924	+	ENSG00000150787.3	ENST00000280362.3	chr11	112097088	112104696	+	0.73
ENST00000502314.1	chr5	114847774	114849391	+	ENSG00000150753.6	ENST00000280326.4	chr5	10250033	10266524	+	0.92707
ENST00000511142.1	chr17	47114484	47114791	+	ENSG00000187118.8	ENST00000466830.1	chr3	28283086	28366633	+	0.909091
ENST00000532644.1	chr11	4299935	4300422	+	ENSG00000160075.9	ENST00000291386.3	chr1	1477053	1510249	-	0.760246
ENST00000436275.1	chr1	154386845	154387613	-	ENSG00000099341.5	ENST00000215071.4	chr19	38865176	38874464	+	0.927178
ENST00000450164.1	chr1	163207004	163209345	+	ENSG00000072756.12	ENST00000251607.6	chr3	3168600	3190707	+	0.864446
ENST00000426701.1	chr7	138386352	138387807	+	ENSG00000169021.3	ENST00000304863.3	chr19	29698167	29704136	-	0.82133
ENST00000518688.1	chr8	43131413	43131966	-	ENSG00000171763.12	ENST00000305560.6	chr15	45694529	45713617	+	0.720217
ENST00000415407.1	chr11	3612507	3612845	-	ENSG00000149823.3	ENST00000279281.3	chr11	64863631	64879332	+	0.920354
ENST00000472115.1	chr16	70113032	70113527	-	ENSG00000124614.9	ENST00000344700.3	chr6	34385231	34392998	-	0.879032
ENST00000431297.1	chr21	15134659	15136653	+	ENSG00000141965.3	ENST00000269856.3	chr19	4791728	4795571	+	0.952882
ENST00000419756.2	chr11	124350895	124351819	-	ENSG00000170953.2	ENST00000306842.2	chr11	124412578	124413575	-	0.836757
ENST00000435457.1	chr20	4994166	4994370	-	ENSG00000171858.11	ENST00000317311.5	chr20	60962105	60963575	+	0.795122
ENST00000400943.2	chr1	240136087	240137544	+	ENSG00000112972.9	ENST00000325110.6	chr5	43289497	43313595	-	0.890261
ENST00000440335.1	chr6	151546685	151547082	-	ENSG00000112306.7	ENST00000230050.3	chr6	133135580	133138703	+	0.942211
ENST00000433527.1	chr1	148193338	148193856	+	ENSG00000154978.8	ENST00000285279.5	chr7	55538306	55640218	-	0.996146
ENST00000483820.1	chr14	56010119	56010887	+	ENSG00000148303.12	ENST00000323345.6	chr9	136215069	136218281	+	0.892068
ENST00000442297.1	chrX	138529050	138529835	+	ENSG00000145545.7	ENST00000274192.5	chr5	6633456	6669675	+	0.951654
ENST00000453999.1	chr22	22720578	22722138	+	ENSG00000129691.9	ENST00000428278.2	chr8	37963311	37997221	+	0.831518
ENST00000430538.1	chr21	31635698	31636199	-	ENSG00000161016.9	ENST00000394920.2	chr8	146015154	146017774	-	0.900398
ENST00000396692.2	chr20	22866308	22866706	-	ENSG00000166347.12	ENST00000397914.3	chr18	71920528	71959221	-	0.817043
ENST00000452091.1	chr17	15410180	15410668	+	ENSG00000196262.8	ENST00000468812.1	chr7	44836279	44842716	+	0.90593
ENST00000411880.2	chr12	8521588	8521951	+	ENSG00000138326.12	ENST00000440692.1	chr10	79793518	79816570	+	0.821429
ENST00000442317.2	chr22	41069488	41070455	-	ENSG00000111640.8	ENST00000229239.5	chr12	6643093	6647537	+	0.860537
ENST00000488389.1	chr11	30389695	30390193	+	ENSG00000197958.8	ENST00000361436.5	chr9	130209953	130213684	-	0.861723
ENST00000404238.2	chr1	171308440	171309103	+	ENSG00000198900.5	ENST00000361337.2	chr20	39657458	39753127	+	0.968373
ENST00000447996.1	chr1	82187378	82188749	+	ENSG00000100380.7	ENST00000216218.3	chr22	41220539	41253026	-	0.937795
ENST00000433858.2	chr11	3343092	3343428	+	ENSG00000128609.9	ENST00000355749.2	chr7	123181083	123198309	-	0.902077
ENST00000446082.1	chrX	100055291	100055773	-	ENSG00000196262.8	ENST00000489459.1	chr7	44836280	44841229	+	0.906832
ENST00000481845.1	chr11	13707046	13707203	-	ENSG00000198918.6	ENST00000422326.1	chrX	118920510	118925296	-	0.905063
ENST00000498116.1	chr4	15732585	15733250	-	ENSG00000198755.6	ENST00000322203.6	chr6	35436185	35438562	+	0.894895
ENST00000412461.1	chr22	19043327	19044020	+	ENSG00000108107.6	ENST00000426763.1	chr19	55897300	55903449	+	0.818444
ENST00000488133.1	chr14	103507806	103508431	+	ENSG00000167526.8	ENST00000393099.3	chr16	89627119	89630950	+	0.886581
ENST00000464531.1	chr3	83986196	83987387	+	ENSG00000133226.10	ENST00000323848.8	chr1	24969594	24999758	+	0.735738
ENST00000485355.1	chr4	4078438	4079218	-	ENSG00000145425.5	ENST00000514682.1	chr4	152020781	152025789	+	0.915493
ENST00000414628.1	chr4	153848598	153849359	+	ENSG00000172775.10	ENST00000309137.7	chr16	57186387	57219976	-	0.963255
ENST00000454883.1	chr1	174818805	174819306	-	ENSG00000123545.5	ENST00000316149.7	chr6	97337189	97345757	-	0.904382
ENST00000413857.1	chr13	74951300	74952088	-	ENSG00000122026.6	ENST00000311549.6	chr13	27825446	27830705	+	0.839917
ENST00000426312.1	chr2	187353297	187353852	-	ENSG00000204595.1	ENST00000376650.1	chr19	54135310	54140263	+	0.784173
ENST00000430304.1	chr10	65249221	65249398	+	ENSG00000115541.6	ENST00000233893.5	chr2	198364718	198368181	+	0.870787
ENST00000502748.1	chr4	175938167	175940365	+	ENSG00000168594.10	ENST00000502940.1	chr4	175839517	175896945	+	0.189177
ENST00000486273.1	chr14	100440673	100441486	-	ENSG00000140988.8	ENST00000343262.3	chr16	2012062	2014861	-	0.775184
ENST00000477300.1	chr3	143574581	143574984	-	ENSG00000184779.7	ENST00000330339.7	chr15	82821158	82824972	-	0.886139
ENST00000417306.1	chr16	62391275	62391650	+	ENSG00000144713.8	ENST00000429711.2	chr3	12875984	12883087	-	0.664894
ENST00000398900.2	chr3	170371635	170372048	-	ENSG00000108107.6	ENST00000426763.1	chr19	55897300	55903449	+	0.905797
ENST00000502277.1	chr5	59926341	59926800	+	ENSG00000135932.6	ENST00000258418.5	chr2	231577560	231685790	+	0.828261
ENST00000449203.1	chr7	143677998	143678913	+	ENSG00000213215.1	ENST00000392899.1	chr7	143657027	143658108	+	0.671397
ENST00000414863.1	chrX	97506677	97507535	+	ENSG00000089009.8	ENST00000424576.1	chr12	112842997	112847443	-	0.89057
ENST00000452580.1	chr1	204915779	204916297	+	ENSG00000142541.10	ENST00000391857.4	chr19	49990811	49995565	+	0.843931
ENST00000491883.1	chrX	51425000	51425485	-	ENSG00000166582.4	ENST00000299736.4	chr17	16245848	16256813	-	0.713992
ENST00000424885.1	chr1	179106899	179107069	+	ENSG00000127540.4	ENST00000262946.4	chr19	1597154	1605483	-	0.760234
ENST00000427200.1	chr2	36526531	36526973	-	ENSG00000122026.6	ENST00000311549.6	chr13	27825446	27830705	+	0.905192
ENST00000440646.1	chr6	123180823	123181133	-	ENSG00000167283.3	ENST00000300688.3	chr11	118271869	118280560	+	0.961415
ENST00000448535.1	chr2	108531404	108531742	+	ENSG00000116251.5	ENST00000234875.4	chr1	6245080	6259672	-	0.926254
ENST00000506341.1	chr4	144681552	144683238	-	ENSG00000139163.8	ENST00000381409.4	chr12	22778009	22838643	+	0.795357
ENST00000412037.1	chr22	23522110	23522359	-	ENSG00000186716.14	ENST00000334149.8	chr22	23540438	23657849	+	0.844
ENST00000369177.3	chr6	25732011	25732390	-	ENSG00000196331.5	ENST00000303806.4	chr6	27861203	27861669	+	0.805263
ENST00000327215.6	chr2	31513628	31514470	+	ENSG00000122026.6	ENST00000311549.6	chr13	27825446	27830705	+	0.887006
ENST00000406944.1	chr6	63170845	63171408	-	ENSG00000228716.2	ENST00000439211.2	chr5	79922047	79950802	-	0.829787
ENST00000473049.1	chr1	38242342	38245090	+	ENSG00000130402.4	ENST00000252699.2	chr19	39138310	39222223	+	0.804968
ENST00000465598.1	chr3	146994555	146995039	+	ENSG00000122026.6	ENST00000311549.6	chr13	27825446	27830705	+	0.91939
ENST00000445374.1	chr7	93474101	93474620	+	ENSG00000123545.5	ENST00000316149.7	chr6	97337189	97345757	-	0.9
ENST00000417124.1	chrY	28546758	28547377	+	ENSG00000172115.4	ENST00000305786.2	chr7	25159710	25164980	-	0.851393
ENST00000502804.1	chr4	74809728	74810016	-	ENSG00000163739.4	ENST00000395761.3	chr4	74735121	74736959	+	0.890052
ENST00000405916.2	chr6	157720077	157721158	-	ENSG00000134333.7	ENST00000540430.1	chr11	18417813	18429765	+	0.749538
ENST00000466800.1	chr5	107929310	107929668	+	ENSG00000008988.5	ENST00000519807.1	chr8	56979854	56987068	-	0.933148
ENST00000431451.1	chr9	41513369	41513699	-	ENSG00000150787.3	ENST00000280362.3	chr11	112097088	112104696	+	0.755287
ENST00000400616.2	chr20	7812445	7812969	-	ENSG00000188529.9	ENST00000344989.5	chr1	24291294	24306846	-	0.918095
ENST00000523233.1	chr8	74423511	74423889	-	ENSG00000104472.5	ENST00000519533.1	chr8	141521410	141526566	+	0.810026
ENST00000456725.1	chr20	34132175	34132492	-	ENSG00000130255.6	ENST00000347512.2	chr19	5690272	5691674	+	0.877358
ENST00000469948.1	chr5	137809433	137810050	+	ENSG00000147604.9	ENST00000396467.1	chr8	74202519	74205868	-	0.949838
ENST00000433994.1	chr2	127069043	127069504	-	ENSG00000087916.7	ENST00000371900.4	chrX	115567790	115592625	+	0.790043
ENST00000433306.1	chrX	25212498	25213324	-	ENSG00000037897.11	ENST00000324871.6	chr12	58162254	58166335	-	0.951632
ENST00000430685.1	chr10	114308391	114308631	-	ENSG00000156508.12	ENST00000316292.9	chr6	74225473	74230741	-	0.950207
ENST00000434711.1	chr10	59272917	59273185	+	ENSG00000173213.4	ENST00000308911.4	chr18	47390	49557	-	0.762082
ENST00000441426.1	chr1	174891244	174891577	-	ENSG00000197728.4	ENST00000356464.4	chr12	56435686	56438005	+	0.820359
ENST00000440070.1	chr10	115876906	115877310	+	ENSG00000244687.3	ENST00000340309.3	chr20	48697661	48732491	-	0.896296
ENST00000483112.1	chr3	149656784	149657586	-	ENSG00000181163.9	ENST00000296930.5	chr5	170814652	170838141	+	0.931507
ENST00000423202.1	chr1	143719704	143721519	+	ENSG00000176853.10	ENST00000334705.7	chr8	124780697	124827692	+	0.967953
ENST00000413855.1	chr1	228322495	228322693	-	ENSG00000233927.2	ENST00000449223.2	chr19	8386384	8387809	+	0.849246
ENST00000405827.1	chr6	23972107	23973151	+	ENSG00000143319.11	ENST00000313146.6	chr1	156691683	156698227	-	0.886124
ENST00000511479.1	chr4	170712372	170712853	-	ENSG00000110958.9	ENST00000262033.5	chr12	57057127	57082078	-	0.960581
ENST00000433312.1	chr21	15196727	15197956	-	ENSG00000151233.5	ENST00000280876.5	chr12	42475650	42538673	-	0.89187
ENST00000521355.1	chr8	85591033	85592077	+	ENSG00000161057.6	ENST00000435765.1	chr7	102985361	103009842	+	0.849761
ENST00000454064.1	chr2	228643226	228643451	-	ENSG00000143977.9	ENST00000272348.2	chr2	70508494	70520903	-	0.920354
ENST00000447781.1	chr1	153352325	153353440	-	ENSG00000104341.10	ENST00000521545.1	chr8	98788238	98863702	+	0.708585
ENST00000517657.1	chr8	81480285	81480741	-	ENSG00000145247.7	ENST00000508632.1	chr4	48887036	48908845	-	0.886214
ENST00000441452.1	chr10	5249132	5249705	+	ENSG00000122644.8	ENST00000356797.3	chr7	12726533	12728801	+	0.864111
ENST00000439132.1	chr1	79520630	79521740	-	ENSG00000135069.8	ENST00000376588.3	chr9	80912059	80945009	+	0.954095
ENST00000443918.1	chr1	68980058	68980352	-	ENSG00000136810.8	ENST00000374517.5	chr9	113006091	113018920	-	0.833898
ENST00000478876.1	chr12	77115314	77116066	+	ENSG00000147604.9	ENST00000396467.1	chr8	74202519	74205868	-	0.831341
ENST00000406333.1	chr6	119590298	119590879	-	ENSG00000142541.10	ENST00000391857.4	chr19	49990811	49995565	+	0.841924
ENST00000492525.1	chr8	29974900	29975295	-	ENSG00000134419.9	ENST00000322989.4	chr16	18792617	18801656	-	0.959596
ENST00000423089.1	chr21	39610149	39610586	-	ENSG00000006282.12	ENST00000006658.6	chr17	48624450	48633213	+	0.901826
ENST00000447985.1	chr21	30259602	30261594	-	ENSG00000144381.10	ENST00000345042.2	chr2	198351310	198364998	-	0.909846
ENST00000483777.2	chr5	154373158	154374005	+	ENSG00000115944.9	ENST00000378669.1	chr2	42576478	42596150	-	0.876106
ENST00000433596.1	chr2	43907604	43908761	-	ENSG00000103994.9	ENST00000263805.3	chr15	42705022	42749730	-	0.879102
ENST00000417593.1	chr2	234630168	234630711	-	ENSG00000215472.3	ENST00000441578.1	chr18	47014858	47018906	-	0.834559
ENST00000449443.1	chr7	113937169	113937484	-	ENSG00000130255.6	ENST00000394580.1	chr19	5690346	5691674	+	0.898734
ENST00000521412.1	chr5	178199437	178224612	-	ENSG00000081760.11	ENST00000316519.6	chr12	125549925	125627866	+	0.896842
ENST00000396326.2	chr10	30806545	30807790	-	ENSG00000135486.10	ENST00000330752.6	chr12	54674488	54679028	+	0.892004
ENST00000402907.1	chr6	143663383	143664520	+	ENSG00000175193.8	ENST00000317096.4	chr3	183547173	183602695	-	0.927944
ENST00000436316.1	chr2	5453873	5454267	-	ENSG00000158186.8	ENST00000289104.4	chr3	138066539	138124375	+	0.713924
ENST00000412724.1	chrX	15935671	15936754	+	ENSG00000119335.11	ENST00000372692.4	chr9	131445934	131458679	+	0.872404
ENST00000502306.1	chr5	15450810	15451920	+	ENSG00000184009.2	ENST00000331925.1	chr17	79476999	79479827	-	0.865887
ENST00000466902.1	chr3	96285201	96285947	+	ENSG00000162521.12	ENST00000373493.4	chr1	33116749	33146254	+	0.876841
ENST00000432890.1	chr3	186478893	186479564	+	ENSG00000101843.13	ENST00000217958.3	chrX	107327437	107334848	-	0.928571
ENST00000415189.1	chr14	55471531	55472405	-	ENSG00000168028.8	ENST00000301821.5	chr3	39448180	39453929	+	0.892571
ENST00000404167.1	chr6	121102366	121102658	+	ENSG00000226976.1	ENST00000423336.1	chr6	37012607	37013177	+	0.863481
ENST00000436312.1	chrX	143391965	143392205	-	ENSG00000171848.7	ENST00000304567.4	chr2	10262455	10271545	+	0.887967
ENST00000403367.1	chr6	89769347	89769828	+	ENSG00000100478.9	ENST00000542754.1	chr14	31494683	31562634	+	0.970954
ENST00000422792.1	chr2	48110594	48111048	+	ENSG00000143947.8	ENST00000272317.6	chr2	55459538	55462989	+	0.89011
ENST00000419456.1	chr9	97100632	97101022	-	ENSG00000189266.6	ENST00000334351.7	chr1	24286302	24289952	+	0.905371
ENST00000418851.1	chr2	54256689	54257819	-	ENSG00000122026.6	ENST00000311549.6	chr13	27825446	27830705	+	0.895631
ENST00000488297.2	chr5	87677774	87678542	+	ENSG00000145425.5	ENST00000514682.1	chr4	152020781	152025789	+	0.894668
ENST00000413322.1	chr2	228734799	228735360	-	ENSG00000241186.2	ENST00000296145.5	chr3	46618727	46623953	+	0.918149
ENST00000491506.2	chr3	52227186	52228801	+	ENSG00000149925.10	ENST00000395248.1	chr16	30064444	30081741	+	0.906308
ENST00000531124.1	chr11	80668360	80668677	+	ENSG00000111775.1	ENST00000229379.1	chr12	120875904	120878532	+	0.773585
ENST00000463581.1	chr3	141443267	141443368	+	ENSG00000111640.8	ENST00000450282.2	chr12	6643686	6647536	+	0.892157
ENST00000485801.1	chr3	132120097	132120640	+	ENSG00000132603.7	ENST00000254940.4	chr16	69373343	69377014	+	0.926471
ENST00000447462.1	chr3	193483470	193483792	+	ENSG00000111775.1	ENST00000229379.1	chr12	120875904	120878532	+	0.739938
ENST00000514075.1	chr4	8176148	8176721	+	ENSG00000163655.8	ENST00000496455.1	chr3	155588325	155658457	+	0.977352
ENST00000432876.1	chr20	44196629	44197446	-	ENSG00000100814.11	ENST00000437553.2	chr14	20779530	20797533	-	0.876528
ENST00000396712.2	chr13	43507994	43509028	+	ENSG00000136247.10	ENST00000335965.6	chr7	6617084	6628557	+	0.817391
ENST00000454390.1	chr9	105277564	105279672	+	ENSG00000107771.11	ENST00000372088.2	chr10	86088419	86274162	+	0.857752
ENST00000522972.1	chr8	95721180	95721472	-	ENSG00000122026.6	ENST00000311549.6	chr13	27825446	27830705	+	0.870307
ENST00000439573.1	chr10	51532102	51532572	-	ENSG00000182899.10	ENST00000464167.1	chr3	197676858	197683481	+	0.717622
ENST00000367074.3	chrX	27536001	27537876	+	ENSG00000137710.9	ENST00000343115.4	chr11	110100175	110167447	-	0.961713
ENST00000479658.1	chr2	64574327	64574875	-	ENSG00000198242.7	ENST00000422514.2	chr17	27046411	27051377	+	0.923497
ENST00000510543.1	chr4	63682544	63684512	+	ENSG00000070367.10	ENST00000413566.1	chr14	57669201	57735617	-	0.970543
ENST00000411735.1	chr1	191115133	191116091	-	ENSG00000135486.10	ENST00000330752.6	chr12	54674488	54679028	+	0.920751
ENST00000441314.1	chr22	41194043	41194289	+	ENSG00000143543.10	ENST00000271843.4	chr1	153946745	153950164	-	0.809717
ENST00000431545.1	chr2	139045599	139046363	-	ENSG00000108953.9	ENST00000264335.7	chr17	1247566	1303505	-	0.959477
ENST00000429793.1	chr3	195771566	195772125	+	ENSG00000134108.7	ENST00000256496.3	chr3	5163905	5222596	+	0.819767
ENST00000505816.1	chr4	176883212	176883636	+	ENSG00000161800.7	ENST00000427314.1	chr12	50382945	50419307	-	0.915294
ENST00000436135.1	chr1	158493462	158495628	+	ENSG00000080824.10	ENST00000216281.6	chr14	102547073	102553512	-	0.93078
ENST00000424397.2	chr4	113606211	113606659	+	ENSG00000198856.8	ENST00000361564.4	chr4	109571740	109588976	+	0.928731
ENST00000506077.1	chr4	10286585	10287332	-	ENSG00000157601.9	ENST00000398598.3	chr21	42798094	42831141	+	0.716578
ENST00000465138.1	chr3	156695347	156695614	+	ENSG00000118922.11	ENST00000377669.2	chr13	74260226	74569186	-	0.738806
ENST00000429033.1	chr21	32432919	32435487	-	ENSG00000114062.9	ENST00000438097.1	chr15	25582396	25650653	-	0.949535
ENST00000486628.1	chr17	34930301	34931164	-	ENSG00000140988.8	ENST00000343262.3	chr16	2012062	2014861	-	0.895833
ENST00000510537.1	chr5	80538149	80538418	-	ENSG00000112306.7	ENST00000230050.3	chr6	133135580	133138703	+	0.925926
ENST00000427253.1	chr7	130927349	130927754	+	ENSG00000131469.7	ENST00000253788.4	chr17	41150446	41154956	+	0.928571
ENST00000415677.1	chr9	88513818	88514631	+	ENSG00000167085.6	ENST00000300408.3	chr17	47481414	47492242	-	0.921376
ENST00000442006.1	chr1	39174626	39176564	+	ENSG00000044574.6	ENST00000324460.6	chr9	127997132	128003609	-	0.945848
ENST00000441919.1	chr9	70116377	70116866	-	ENSG00000144015.4	ENST00000272395.2	chr2	96257766	96265526	+	0.816327
ENST00000511578.1	chr3	129732025	129732384	-	ENSG00000149823.3	ENST00000279281.3	chr11	64863631	64879332	+	0.919444
ENST00000407887.1	chr6	150825947	150831436	-	ENSG00000242110.3	ENST00000335606.6	chr5	33986283	34008213	-	0.769142
ENST00000419108.1	chr7	36148634	36150482	-	ENSG00000072518.14	ENST00000512060.1	chr11	63656168	63662698	+	0.168199
ENST00000427031.1	chr5	141946265	141946641	+	ENSG00000112306.7	ENST00000230050.3	chr6	133135580	133138703	+	0.779841
ENST00000423082.1	chr1	111550322	111558152	-	ENSG00000082258.8	ENST00000264157.5	chr2	135676395	135716912	+	0.852471
ENST00000399027.3	chr6	34187216	34187843	+	ENSG00000172115.4	ENST00000305786.2	chr7	25159710	25164980	-	0.96463
ENST00000445465.2	chr7	116902972	116904942	-	ENSG00000135486.10	ENST00000340913.5	chr12	54674488	54679028	+	0.80305
ENST00000451988.1	chr7	64707972	64708122	-	ENSG00000116133.6	ENST00000371269.3	chr1	55315306	55352891	-	0.774834
ENST00000529830.1	chr11	35988560	35990226	-	ENSG00000166483.5	ENST00000527848.1	chr11	9608261	9615004	+	0.209958
ENST00000527936.1	chr11	82546551	82548264	+	ENSG00000125977.6	ENST00000374980.2	chr20	32676104	32700138	-	0.887432
ENST00000450070.1	chr20	37606354	37607065	-	ENSG00000181163.9	ENST00000393820.2	chr5	170814855	170834129	+	0.929775
ENST00000446969.1	chr2	96305929	96306352	-	ENSG00000064309.10	ENST00000531738.1	chr11	125827347	125874340	-	0.773585
ENST00000447766.1	chr7	94979476	94980541	+	ENSG00000244476.2	ENST00000472091.1	chr6	11102722	11111965	-	0.84803
ENST00000426552.1	chr13	46261683	46262604	-	ENSG00000198074.4	ENST00000359579.4	chr7	134212344	134226160	+	0.715835
ENST00000411849.1	chr10	19778030	19778329	+	ENSG00000205581.6	ENST00000380749.5	chr21	40714241	40721126	-	0.9
ENST00000413694.1	chr1	185140466	185140842	-	ENSG00000116251.5	ENST00000234875.4	chr1	6245080	6259672	-	0.877984
ENST00000419532.1	chr10	22555920	22556275	+	ENSG00000071082.5	ENST00000409711.1	chr2	101619153	101622829	+	0.876404
ENST00000441407.1	chr7	32768181	32768623	+	ENSG00000180233.7	ENST00000323037.4	chr7	30323923	30407308	+	0.911964
ENST00000508308.1	chr5	147600923	147601205	-	ENSG00000205581.6	ENST00000361263.4	chr21	40714242	40718454	-	0.812721
ENST00000478778.1	chr5	115898258	115898626	+	ENSG00000164587.7	ENST00000401695.3	chr5	149822753	149829310	-	0.934959
ENST00000449334.1	chr1	212997369	212997846	+	ENSG00000083845.3	ENST00000196551.3	chr19	58898636	58906170	+	0.887029
ENST00000454208.1	chr2	179866483	179867487	+	ENSG00000137154.8	ENST00000315377.4	chr9	19376283	19380196	-	0.829787
ENST00000487630.1	chr3	138515693	138516082	+	ENSG00000198242.7	ENST00000422514.2	chr17	27046411	27051377	+	0.830769
ENST00000418637.1	chr6	108639283	108639608	+	ENSG00000241343.2	ENST00000409170.3	chrX	100646000	100667153	+	0.831288
ENST00000453979.1	chr1	51246011	51246818	+	ENSG00000167085.6	ENST00000300408.3	chr17	47481414	47492242	-	0.841584
ENST00000444292.1	chrX	95228333	95229313	-	ENSG00000136504.7	ENST00000503935.2	chr17	47866745	47906456	+	0.976555
ENST00000402520.1	chr16	1379079	1379778	+	ENSG00000008988.5	ENST00000519807.1	chr8	56979854	56987068	-	0.809769
ENST00000492365.1	chr8	98636431	98637307	-	ENSG00000140988.8	ENST00000343262.3	chr16	2012062	2014861	-	0.879133
ENST00000529692.1	chr11	124386207	124387138	-	ENSG00000197125.2	ENST00000328064.2	chr11	124310022	124311054	-	0.814378
ENST00000496207.1	chr7	6906289	6907303	-	ENSG00000237521.1	ENST00000456448.1	chr19	9361606	9362820	+	0.837438
ENST00000426392.1	chr7	39894093	39894655	-	ENSG00000182552.10	ENST00000326397.5	chr4	184560788	184580378	-	0.992895
ENST00000413346.1	chr1	231157357	231157929	+	ENSG00000063978.10	ENST00000511600.1	chr4	2481580	2517581	+	0.95288
ENST00000435940.1	chr3	39379620	39380370	-	ENSG00000188312.8	ENST00000375576.1	chr9	95372826	95377446	+	0.804622
ENST00000461190.1	chr3	123870807	123871910	-	ENSG00000147604.9	ENST00000396467.1	chr8	74202519	74205868	-	0.94382
ENST00000398116.2	chr21	44971110	44971481	+	ENSG00000071082.5	ENST00000264258.3	chr2	101618177	101623729	+	0.908602
ENST00000444945.1	chr19	11776884	11777845	-	ENSG00000135486.10	ENST00000330752.6	chr12	54674488	54679028	+	0.995842
ENST00000503761.1	chr4	54953093	54953950	+	ENSG00000123562.10	ENST00000423833.2	chrX	102930433	102941149	-	0.90676
ENST00000441321.1	chr2	120750775	120751187	-	ENSG00000131469.7	ENST00000253788.4	chr17	41150446	41154956	+	0.881356
ENST00000495231.1	chr14	35209542	35210039	-	ENSG00000197958.8	ENST00000361436.5	chr9	130209953	130213684	-	0.961847
ENST00000477436.1	chr11	17159523	17159812	-	ENSG00000109475.12	ENST00000394668.2	chr4	109541812	109551568	+	0.944828
ENST00000428997.1	chr9	109484631	109485211	+	ENSG00000143207.13	ENST00000367665.3	chr1	175911248	176176370	-	0.927711
ENST00000422795.1	chrX	8824706	8825100	-	ENSG00000110200.4	ENST00000502597.2	chr11	71817424	71823750	-	0.731646
ENST00000505098.1	chr5	115106283	115106686	+	ENSG00000132475.3	ENST00000254810.3	chr17	73772517	73775860	-	0.75
ENST00000422979.1	chrX	45240772	45241240	-	ENSG00000102934.4	ENST00000219207.4	chr16	57290009	57318599	-	0.940299
ENST00000339626.5	chr13	41192875	41195485	+	ENSG00000127870.12	ENST00000346166.3	chr13	26786905	26795979	-	0.929167
ENST00000496515.1	chr14	39625946	39627061	+	ENSG00000148303.12	ENST00000323345.6	chr9	136215069	136218281	+	0.886076
ENST00000511727.1	chr5	125198439	125198886	-	ENSG00000145425.5	ENST00000507327.1	chr4	152020821	152025642	+	0.723214
ENST00000502740.1	chr8	15663658	15664792	-	ENSG00000100614.12	ENST00000395076.4	chr14	60715986	60765805	+	0.912775
ENST00000455321.1	chr10	52486707	52487729	-	ENSG00000164219.5	ENST00000419445.1	chr5	114546527	114598569	-	0.964809
ENST00000513388.1	chr4	103672558	103673794	+	ENSG00000138442.3	ENST00000261015.3	chr2	203745323	203776949	-	0.92401
ENST00000417812.1	chr6	27375476	27375775	+	ENSG00000180398.7	ENST00000444761.2	chr2	47129009	47168994	-	0.926667
ENST00000397973.2	chr13	65883987	65885085	-	ENSG00000147465.6	ENST00000276449.4	chr8	38001167	38008783	-	0.911392
ENST00000433830.1	chr2	103892362	103892596	+	ENSG00000141664.4	ENST00000269499.4	chr18	60190658	60245793	+	0.86383
ENST00000520123.1	chr8	102236169	102236801	-	ENSG00000089693.5	ENST00000203630.5	chr12	6857173	6862721	-	0.802528
ENST00000392050.2	chr13	115072121	115072541	+	ENSG00000105205.5	ENST00000221804.3	chr19	40221896	40228668	-	0.833729
ENST00000452289.1	chr10	127648777	127648975	-	ENSG00000242616.2	ENST00000374293.3	chr9	114423615	114432504	+	0.884422
ENST00000455717.1	chrX	84010144	84010854	+	ENSG00000119335.11	ENST00000372692.4	chr9	131445934	131458679	+	0.939522
ENST00000405959.1	chr6	153280412	153280773	-	ENSG00000162194.8	ENST00000354588.3	chr11	62430287	62439241	-	0.89779
ENST00000515105.1	chr5	17502152	17502472	-	ENSG00000132475.3	ENST00000254810.3	chr17	73772517	73775860	-	0.713396
ENST00000426602.1	chrX	54173805	54174062	+	ENSG00000145592.9	ENST00000274242.5	chr5	40825364	40835437	-	0.810078
ENST00000478565.1	chr7	139992552	139993139	+	ENSG00000184203.3	ENST00000328432.3	chr3	195241221	195270209	-	0.867347
ENST00000392075.2	chr1	171772657	171773099	+	ENSG00000115268.3	ENST00000233609.3	chr19	1438363	1440492	+	0.805869
ENST00000441645.1	chr2	237316489	237317720	-	ENSG00000100316.11	ENST00000216146.4	chr22	39708889	39715776	-	0.878247
ENST00000434394.1	chr1	162949341	162949583	-	ENSG00000131174.4	ENST00000481445.1	chrX	77154935	77162870	+	0.876543
ENST00000465747.1	chr15	96991384	96991723	+	ENSG00000071082.5	ENST00000409711.1	chr2	101619153	101622829	+	0.926471
ENST00000511173.1	chr3	139563920	139564253	-	ENSG00000173113.2	ENST00000544844.1	chr11	64084163	64085556	-	0.724551
ENST00000530091.1	chr11	75653173	75653479	-	ENSG00000116030.12	ENST00000392246.2	chr2	203070903	203103331	-	0.807818
ENST00000439811.1	chr6	112682639	112683924	-	ENSG00000111057.5	ENST00000388835.2	chr12	53342843	53346684	+	0.919907
ENST00000470623.1	chr16	58859795	58860273	+	ENSG00000197958.8	ENST00000361436.5	chr9	130209953	130213684	-	0.810021
ENST00000530696.1	chr11	49904551	49904926	+	ENSG00000144015.4	ENST00000272395.2	chr2	96257766	96265526	+	0.800532
ENST00000458399.1	chr1	147313096	147314537	+	ENSG00000204479.3	ENST00000376098.3	chr1	13716088	13719064	+	0.898058
ENST00000507715.1	chr4	33402160	33402301	+	ENSG00000170421.5	ENST00000293308.5	chr12	53290971	53298868	-	0.880282
ENST00000455938.1	chr1	149114655	149115188	+	ENSG00000108518.6	ENST00000225655.5	chr17	4848947	4852309	-	0.840824
ENST00000447588.1	chrY	27539301	27540203	-	ENSG00000215153.2	ENST00000399699.2	chr10	38737272	38741080	+	0.936877
ENST00000407698.1	chr6	47530358	47530754	+	ENSG00000112306.7	ENST00000230050.3	chr6	133135580	133138703	+	0.856423
ENST00000537214.1	chr12	5141554	5142107	-	ENSG00000175390.7	ENST00000309828.4	chr11	8008867	8017716	+	0.900722
ENST00000534173.1	chr8	104571327	104571617	-	ENSG00000187514.9	ENST00000409115.3	chr2	232573219	232578251	+	0.862543
ENST00000439323.1	chrX	26515053	26523720	+	ENSG00000155816.13	ENST00000319653.9	chr1	240255180	240638489	+	0.897167
ENST00000403062.1	chr6	122004071	122005412	+	ENSG00000105216.7	ENST00000356258.4	chr19	34663352	34720420	+	0.902385
ENST00000398690.2	chrX	96208638	96209194	-	ENSG00000136521.8	ENST00000259037.3	chr3	179322490	179342285	+	0.806104
ENST00000435663.1	chr9	108611991	108612884	+	ENSG00000169100.7	ENST00000381401.5	chrX	1505045	1511617	-	0.769575
ENST00000497299.1	chr16	18026576	18027133	+	ENSG00000147604.9	ENST00000396467.1	chr8	74202519	74205868	-	0.971326
ENST00000536775.1	chr12	133476570	133476954	+	ENSG00000100138.9	ENST00000355257.3	chr22	42069934	42084913	-	0.919481
ENST00000445929.1	chr7	122316634	122316865	+	ENSG00000150760.8	ENST00000280333.6	chr10	128593978	129250781	+	0.939655
ENST00000487776.1	chr16	63384667	63385053	-	ENSG00000134419.9	ENST00000322989.4	chr16	18792617	18801656	-	0.852713
ENST00000544259.1	chr12	133793796	133794261	-	ENSG00000124334.10	ENST00000244174.5	chrX	155227246	155240273	+	0.813305
ENST00000417077.1	chr6	10214083	10214595	-	ENSG00000122026.6	ENST00000311549.6	chr13	27825446	27830705	+	0.937622
ENST00000437636.1	chr22	30004889	30005490	+	ENSG00000197713.9	ENST00000359429.6	chr2	210867289	210886300	+	0.913621
ENST00000446203.1	chr13	100060035	100061316	-	ENSG00000169508.6	ENST00000376414.4	chr13	99946784	99959659	-	0.597194
ENST00000494882.1	chr18	13919602	13919922	-	ENSG00000165502.5	ENST00000298289.5	chr14	50085407	50087361	-	0.890966
ENST00000437961.1	chrX	85106580	85106687	-	ENSG00000170633.10	ENST00000392465.2	chr12	121837902	121862155	+	0.842593
ENST00000456305.1	chr1	117317742	117318245	-	ENSG00000167996.10	ENST00000273550.7	chr11	61731757	61735132	-	0.81746
ENST00000420809.1	chr7	24945754	24946213	-	ENSG00000124562.5	ENST00000374017.3	chr6	34725331	34741571	+	0.841304
ENST00000478962.1	chr15	27096279	27096757	-	ENSG00000163682.10	ENST00000449470.2	chr4	39455757	39460508	-	0.745303
ENST00000416876.1	chr2	74578261	74578546	+	ENSG00000197780.4	ENST00000338366.5	chr1	109606762	109618624	-	0.818182
ENST00000506407.1	chr3	130637070	130637964	-	ENSG00000175183.4	ENST00000311083.4	chr12	77252496	77272799	-	0.931818
ENST00000407157.1	chr6	24750900	24751852	-	ENSG00000177879.10	ENST00000316788.7	chr5	115177178	115249778	+	0.857143
ENST00000394500.2	chr4	118496253	118497264	-	ENSG00000122643.13	ENST00000242210.7	chr7	33053760	33102409	-	0.977273
ENST00000471393.1	chr8	54445468	54446264	+	ENSG00000122026.6	ENST00000311549.6	chr13	27825446	27830705	+	0.926778
ENST00000414531.1	chr9	13021698	13022891	-	ENSG00000138385.9	ENST00000409333.1	chr2	170655789	170668574	+	0.900335
ENST00000428372.1	chr9	41054834	41056158	-	ENSG00000004478.5	ENST00000001008.4	chr12	2904119	2913124	+	0.932075
ENST00000419696.1	chr1	117256455	117257457	-	ENSG00000111640.8	ENST00000229239.5	chr12	6643093	6647537	+	0.901296
ENST00000517809.1	chr8	65483470	65483889	-	ENSG00000125691.7	ENST00000479035.1	chr17	37004118	37010064	-	0.761905
ENST00000452524.1	chr1	168867374	168867677	+	ENSG00000116030.12	ENST00000392245.1	chr2	203070910	203103322	-	0.914474
ENST00000422587.1	chr1	72767155	72767506	+	ENSG00000071082.5	ENST00000264258.3	chr2	101618177	101623729	+	0.909091
ENST00000445263.1	chrX	73380895	73382363	-	ENSG00000133606.5	ENST00000539898.1	chr7	140152860	140176717	-	0.893805
ENST00000509526.1	chr5	17649155	17649738	+	ENSG00000064995.12	ENST00000361288.4	chr6	34845555	34855866	-	0.726027
ENST00000451170.1	chrX	51666648	51666836	+	ENSG00000184076.9	ENST00000332801.7	chr22	30163352	30165929	+	0.873016
ENST00000436818.2	chr9	103737950	103738964	+	ENSG00000111640.8	ENST00000229239.5	chr12	6643093	6647537	+	0.829557
ENST00000419971.1	chr3	175831490	175832325	-	ENSG00000095209.7	ENST00000374688.1	chr9	108463265	108538893	+	0.83134
ENST00000467232.1	chr5	151875279	151875578	-	ENSG00000241343.2	ENST00000392994.3	chrX	100645977	100650781	+	0.8
ENST00000435214.1	chrX	91714669	91715951	+	ENSG00000111057.5	ENST00000388835.2	chr12	53342843	53346684	+	0.957911
ENST00000510485.1	chr4	70383415	70384120	-	ENSG00000135220.6	ENST00000251566.4	chr4	69794181	69817509	-	0.787535
ENST00000515830.1	chr4	176496019	176497291	+	ENSG00000134007.2	ENST00000256389.2	chr14	70989078	71001732	-	0.651218
ENST00000478757.1	chr15	72426982	72427752	+	ENSG00000122026.6	ENST00000272274.4	chr13	27825716	27830705	+	0.590143
ENST00000412785.1	chr1	52627858	52628698	-	ENSG00000164548.6	ENST00000297071.4	chr7	23544399	23571660	-	0.882283
ENST00000543705.1	chr11	114383428	114384153	-	ENSG00000204361.5	ENST00000375475.4	chr11	114549200	114579362	+	0.818182
ENST00000433478.1	chr7	117127791	117127983	+	ENSG00000144713.8	ENST00000396953.2	chr3	12877559	12883028	-	0.709845
ENST00000438481.1	chr1	243138307	243138386	+	ENSG00000229117.3	ENST00000501597.2	chr12	56510374	56511615	+	0.9625
ENST00000423837.1	chr1	160639938	160640769	+	ENSG00000119335.11	ENST00000322030.8	chr9	131451505	131458667	+	0.901442
ENST00000433548.1	chr2	11491753	11492244	+	ENSG00000196262.8	ENST00000489459.1	chr7	44836280	44841229	+	0.912602
ENST00000452855.1	chr13	23817659	23821323	+	ENSG00000157014.5	ENST00000287652.4	chr3	10289707	10322900	+	0.590996
ENST00000527480.1	chr11	6015106	6016225	-	ENSG00000111057.5	ENST00000388835.2	chr12	53342843	53346684	+	0.902679
ENST00000457119.1	chr7	108150677	108151420	+	ENSG00000147604.9	ENST00000396467.1	chr8	74202519	74205868	-	0.977151
ENST00000520744.1	chr8	77515475	77516087	-	ENSG00000143436.6	ENST00000368830.3	chr1	151732119	151736040	-	0.880914
ENST00000402141.1	chr6	143757353	143757847	+	ENSG00000137285.7	ENST00000259818.6	chr6	3224517	3227969	-	0.773737
ENST00000413827.1	chr1	171720683	171721165	-	ENSG00000100191.4	ENST00000266086.4	chr22	32614465	32651328	-	0.75853
ENST00000366455.2	chr12	2769102	2770146	+	ENSG00000137154.8	ENST00000380394.4	chr9	19375713	19380252	-	0.714833
ENST00000431775.1	chr20	1141228	1142341	+	ENSG00000184009.2	ENST00000331925.1	chr17	79476999	79479827	-	0.868043
ENST00000318353.2	chr13	50464727	50467134	+	ENSG00000212710.2	ENST00000391403.2	chr18	19993573	19997878	-	0.924419
ENST00000403958.1	chr6	35523650	35524041	+	ENSG00000134419.9	ENST00000322989.4	chr16	18792617	18801656	-	0.954082
ENST00000435125.1	chr2	203385124	203385712	+	ENSG00000142541.10	ENST00000391857.4	chr19	49990811	49995565	+	0.803056
ENST00000425115.1	chr3	44750803	44752378	-	ENSG00000171150.7	ENST00000306503.5	chr2	46926091	46990268	+	0.945431
ENST00000451736.1	chr1	206869182	206869614	-	ENSG00000164587.7	ENST00000401695.3	chr5	149822753	149829310	-	0.935335
ENST00000480160.1	chr11	67693122	67693902	-	ENSG00000145425.5	ENST00000274065.4	chr4	152020725	152025804	+	0.915493
ENST00000531132.1	chr11	109777730	109778467	-	ENSG00000108064.6	ENST00000487519.1	chr10	60144782	60158981	+	0.829268
ENST00000492022.1	chr19	58727546	58727927	+	ENSG00000134419.9	ENST00000322989.4	chr16	18792617	18801656	-	0.882199
ENST00000526979.1	chr11	64942506	64942958	-	ENSG00000171314.6	ENST00000334828.5	chr10	99185917	99193198	+	0.975717
ENST00000422499.1	chr9	65978720	65979683	-	ENSG00000157869.10	ENST00000288723.4	chr4	13369348	13485989	-	0.821053
ENST00000489014.2	chr4	21658134	21658492	-	ENSG00000071082.5	ENST00000409711.1	chr2	101619153	101622829	+	0.78273
ENST00000445106.1	chr20	57688279	57688686	+	ENSG00000182180.9	ENST00000416782.2	chr10	75006510	75012390	-	0.843137
ENST00000450921.1	chr10	32202071	32202682	+	ENSG00000189403.9	ENST00000339872.4	chr13	31033987	31038447	-	0.831699
ENST00000506035.1	chr4	78271526	78272360	-	ENSG00000163530.4	ENST00000478945.1	chr3	109012635	109035364	-	0.692216
ENST00000433398.1	chr7	66071725	66072094	-	ENSG00000136942.9	ENST00000348462.3	chr9	127620163	127624240	-	0.97027
ENST00000475753.1	chr1	120395939	120396365	+	ENSG00000108518.6	ENST00000225655.5	chr17	4848947	4852309	-	0.875878
ENST00000470499.1	chr3	131894246	131895555	+	ENSG00000161057.6	ENST00000435765.1	chr7	102985361	103009842	+	0.932061
ENST00000489238.1	chr3	94654604	94654964	-	ENSG00000164091.7	ENST00000296490.3	chr3	52288437	52312659	-	0.894737
ENST00000399046.2	chr3	44566236	44567297	-	ENSG00000149547.9	ENST00000278903.6	chr11	125439298	125454574	+	0.868173
ENST00000434628.1	chr3	33768742	33769096	-	ENSG00000185885.10	ENST00000408968.3	chr11	313853	315272	+	0.75493
ENST00000479221.1	chr3	137442616	137443385	+	ENSG00000181163.9	ENST00000517671.1	chr5	170814120	170837887	+	0.890365
ENST00000446039.2	chr7	27308976	27309297	-	ENSG00000136942.9	ENST00000373570.3	chr9	127620159	127623835	-	0.92236
ENST00000391782.2	chrX	70639933	70640364	-	ENSG00000100836.5	ENST00000216727.4	chr14	23790498	23795394	+	0.951389
ENST00000458157.1	chr2	25302770	25304558	-	ENSG00000136143.7	ENST00000543413.1	chr13	48517469	48612125	-	0.919676
ENST00000400303.2	chr13	64316498	64316945	+	ENSG00000237521.1	ENST00000456448.1	chr19	9361606	9362820	+	0.823661
ENST00000407121.1	chr6	100023588	100024332	+	ENSG00000149273.8	ENST00000526608.1	chr11	75110581	75115912	+	0.830872
ENST00000432731.1	chr1	111390702	111391563	-	ENSG00000148572.9	ENST00000277746.6	chr10	64893050	64914783	+	0.975638
ENST00000443295.1	chr2	178093919	178094234	-	ENSG00000205981.2	ENST00000382564.2	chr3	180701497	180707561	-	0.870253
ENST00000413701.1	chr1	185249976	185250954	+	ENSG00000103035.4	ENST00000219313.3	chr16	74330673	74344205	+	0.806946
ENST00000441264.1	chr1	226505716	226506394	-	ENSG00000065978.12	ENST00000318612.7	chr1	43148112	43168023	+	0.810015
ENST00000431883.1	chr7	23168797	23169460	+	ENSG00000147853.10	ENST00000474822.2	chr9	4712069	4726250	-	0.847892
ENST00000542491.1	chr12	34315397	34315903	+	ENSG00000188163.6	ENST00000484720.1	chr9	140139604	140142202	-	0.757396
ENST00000332869.5	chr10	60475314	60476017	+	ENSG00000179083.5	ENST00000322139.4	chrX	92929012	92967273	+	0.832386
ENST00000508758.1	chrX	36737991	36738294	+	ENSG00000246705.2	ENST00000389078.3	chr12	14927353	14928515	+	0.664474
ENST00000509113.1	chr5	26670443	26670590	-	ENSG00000140905.4	ENST00000315467.3	chr16	81115566	81130008	-	0.972973
ENST00000512074.1	chr5	84845227	84845770	+	ENSG00000106244.8	ENST00000350498.3	chr7	98992586	99006452	-	0.954044
ENST00000426049.1	chr10	32800264	32800665	-	ENSG00000197223.7	ENST00000355848.3	chr2	68268262	68290115	-	0.995025
ENST00000461659.1	chr5	149401130	149401484	-	ENSG00000008988.5	ENST00000523936.1	chr8	56985632	56986915	-	0.912676
ENST00000406616.1	chr6	69308096	69308285	-	ENSG00000135747.7	ENST00000366503.2	chr1	247200086	247242057	-	0.768421
ENST00000406202.1	chr6	157297428	157298203	+	ENSG00000134419.9	ENST00000322989.4	chr16	18792617	18801656	-	0.893333
ENST00000398565.2	chr10	93878421	93878921	+	ENSG00000143252.9	ENST00000367975.2	chr1	161284047	161332984	+	0.936128
ENST00000490908.1	chr18	3406340	3406816	-	ENSG00000122026.6	ENST00000311549.6	chr13	27825446	27830705	+	0.947589
ENST00000380194.3	chr9	117607874	117610865	+	ENSG00000112739.11	ENST00000337659.6	chr6	4021560	4062141	+	0.921123
ENST00000455730.2	chr13	113930931	113932049	+	ENSG00000111716.8	ENST00000396076.1	chr12	21788276	21810728	-	0.719392
ENST00000441051.1	chr1	116107222	116108053	+	ENSG00000198791.7	ENST00000361272.4	chr8	17086737	17104387	-	0.936298
ENST00000528254.1	chr11	96871274	96871711	-	ENSG00000118579.6	ENST00000237380.6	chr4	17616254	17627254	+	0.849315
ENST00000483273.1	chr1	16133869	16134144	-	ENSG00000173660.7	ENST00000311672.5	chr1	46769303	46782448	+	0.985507
ENST00000429424.1	chr2	70329683	70329994	+	ENSG00000171421.7	ENST00000508987.1	chr5	1798501	1800009	-	0.971154
ENST00000515857.1	chr5	174059935	174060212	+	ENSG00000181061.9	ENST00000321331.7	chr3	42825790	42846023	-	0.917266
ENST00000418207.1	chr9	79013615	79014502	+	ENSG00000168028.8	ENST00000301821.5	chr3	39448180	39453929	+	0.975225
ENST00000447946.1	chr3	37237695	37238157	+	ENSG00000105193.3	ENST00000339471.3	chr19	39923852	39926576	-	0.788337
ENST00000436315.1	chr9	71224041	71226893	+	ENSG00000111817.11	ENST00000452085.2	chr6	116601283	116759440	+	0.942517
ENST00000412207.1	chr13	45168994	45170218	+	ENSG00000073584.13	ENST00000348513.6	chr17	38781214	38804760	-	0.951837
ENST00000493211.1	chr9	46113699	46114039	-	ENSG00000231997.1	ENST00000426006.1	chr9	46390277	46390685	+	0.991202
ENST00000422015.1	chr1	222641436	222644224	+	ENSG00000079432.1	ENST00000160740.1	chr19	42788817	42799949	+	0.840445
ENST00000431429.1	chr2	192038959	192039561	+	ENSG00000189403.9	ENST00000405805.1	chr13	31032884	31191734	-	0.862355
ENST00000422823.1	chr7	64196311	64197121	-	ENSG00000197965.7	ENST00000359523.2	chr1	167691187	167761156	+	0.950678
ENST00000438434.1	chr1	610240	610563	+	ENSG00000166272.12	ENST00000448841.1	chr10	104503727	104575997	+	0.882716
ENST00000543442.1	chr12	67659622	67660746	-	ENSG00000204007.2	ENST00000371763.1	chr9	138515502	138531386	-	0.639111
ENST00000477321.1	chr5	52709334	52710090	+	ENSG00000105372.1	ENST00000221975.1	chr19	42363988	42375482	+	0.901602
ENST00000434334.1	chr2	182559169	182559627	+	ENSG00000150459.6	ENST00000382533.4	chr13	21714653	21723221	+	0.923747
ENST00000521633.1	chr8	95602343	95602487	+	ENSG00000086015.13	ENST00000361297.2	chr1	46269285	46501796	+	0.993103
ENST00000444886.1	chr9	128357948	128358907	+	ENSG00000135486.10	ENST00000330752.6	chr12	54674488	54679028	+	0.923958
ENST00000460281.1	chr5	79611490	79611645	+	ENSG00000198918.6	ENST00000361575.3	chrX	118920469	118925606	-	0.961538
ENST00000425149.1	chr1	229706279	229706543	+	ENSG00000198830.6	ENST00000361427.5	chr1	26799010	26802463	+	0.935849
ENST00000412637.1	chr2	72515914	72516239	+	ENSG00000134419.9	ENST00000322989.4	chr16	18792617	18801656	-	0.907975
ENST00000443361.1	chr9	108282409	108288640	+	ENSG00000174373.9	ENST00000307138.5	chr14	36007559	36278432	-	0.979461
ENST00000418112.1	chr7	137806948	137809000	+	ENSG00000179051.9	ENST00000375436.4	chr1	17733256	17766220	-	0.813078
ENST00000546055.1	chr11	113662188	113662474	+	ENSG00000176809.5	ENST00000334962.5	chr17	62850482	62859703	-	0.881533
ENST00000540201.1	chr11	18511790	18512502	-	ENSG00000166913.8	ENST00000353703.4	chr20	43514317	43537173	+	0.925666
ENST00000324731.6	chr9	34917172	34918287	+	ENSG00000135821.10	ENST00000311223.5	chr1	182350840	182361341	-	0.933692
ENST00000442699.1	chr2	62373548	62374288	+	ENSG00000168028.8	ENST00000301821.5	chr3	39448180	39453929	+	0.982456
ENST00000318548.6	chr10	121756598	121757221	-	ENSG00000196531.5	ENST00000454682.1	chr12	57106212	57119326	-	0.900641
ENST00000512159.1	chr5	45558021	45560088	+	ENSG00000221944.3	ENST00000408957.3	chr2	233412779	233415226	-	0.677466
ENST00000518897.1	chr8	106207218	106209197	-	ENSG00000172765.12	ENST00000513411.1	chr3	129546862	129585943	-	0.0752525
ENST00000474255.1	chr3	128256863	128257474	+	ENSG00000170348.3	ENST00000303575.3	chr14	75598173	75643349	-	0.866013
ENST00000517431.1	chr8	17946078	17947196	-	ENSG00000163322.9	ENST00000321945.7	chr4	84382092	84406334	-	0.886506
ENST00000411687.1	chrX	14262504	14263050	+	ENSG00000170035.9	ENST00000410062.2	chr2	181845333	181928168	+	0.97989
ENST00000454958.1	chrY	20438493	20439381	-	ENSG00000085231.9	ENST00000380822.4	chr5	68646811	68665369	-	0.914563
ENST00000443208.1	chr10	70020314	70021256	+	ENSG00000171345.8	ENST00000361566.3	chr17	39679869	39684560	-	0.798515
ENST00000478358.1	chr12	95861173	95861637	-	ENSG00000162244.5	ENST00000466397.1	chr3	52027644	52029879	-	0.978495
ENST00000423464.1	chr1	50791803	50792679	+	ENSG00000140988.8	ENST00000343262.3	chr16	2012062	2014861	-	0.927024
ENST00000413895.1	chr2	203939408	203939865	-	ENSG00000198242.7	ENST00000422514.2	chr17	27046411	27051377	+	0.783843
ENST00000438347.1	chr10	30692126	30692705	-	ENSG00000112576.8	ENST00000372991.4	chr6	41902671	41909586	-	0.860345
ENST00000458527.1	chr22	20499890	20503484	-	ENSG00000196422.5	ENST00000356818.2	chr9	138371648	138380739	+	0.904868
ENST00000423841.1	chr1	182305136	182305469	+	ENSG00000173812.4	ENST00000469257.1	chr17	39845145	39848920	+	0.95509
ENST00000448009.1	chr10	65394077	65394587	-	ENSG00000132313.9	ENST00000337109.4	chr2	86426580	86440917	+	0.921722
ENST00000511179.1	chr17	48313206	48313490	+	ENSG00000188612.6	ENST00000420826.1	chr17	73163825	73179098	-	0.929825
ENST00000456482.1	chr9	23632104	23632353	+	ENSG00000188612.6	ENST00000314523.6	chr17	73163825	73179098	-	0.816
ENST00000507811.1	chr4	53306721	53307701	-	ENSG00000154889.11	ENST00000317235.6	chr18	11883470	11908641	-	0.703364
ENST00000426040.1	chr3	27665693	27665947	-	ENSG00000177954.7	ENST00000368567.4	chr1	153963235	153964626	+	0.933333
ENST00000325243.6	chr11	27827990	27828543	+	ENSG00000122565.13	ENST00000337620.4	chr7	26240782	26252976	+	0.940433
ENST00000419031.1	chr1	221723130	221723985	-	ENSG00000175782.7	ENST00000398004.2	chr12	69139886	69162470	+	0.795561
ENST00000404458.1	chr6	95054455	95054680	+	ENSG00000148303.12	ENST00000323345.6	chr9	136215069	136218281	+	0.823009
ENST00000448883.1	chr2	194595279	194595413	-	ENSG00000132432.9	ENST00000395535.3	chr7	54819943	54826939	-	0.888889
ENST00000498453.1	chr5	130325590	130326121	+	ENSG00000142676.8	ENST00000374550.3	chr1	24018269	24022915	+	0.921053
ENST00000541141.1	chr12	26953776	26954235	+	ENSG00000121310.11	ENST00000371520.1	chr1	53361904	53387375	-	0.856522
ENST00000527668.1	chr11	89464185	89467950	+	ENSG00000064309.10	ENST00000392693.3	chr11	125825691	125933187	-	0.858205
ENST00000461599.1	chr3	148703655	148705455	-	ENSG00000160803.6	ENST00000368309.3	chr1	156005092	156023585	-	0.986119
ENST00000445829.1	chr10	104597768	104605230	-	ENSG00000108518.6	ENST00000225655.5	chr17	4848947	4852309	-	0.868895
ENST00000469811.1	chr14	77352720	77353093	-	ENSG00000116251.5	ENST00000234875.4	chr1	6245080	6259672	-	0.951872
ENST00000446460.1	chr9	113489736	113489959	-	ENSG00000171858.11	ENST00000370562.1	chr20	60962353	60963576	+	0.84375
ENST00000468766.1	chr3	74150500	74152704	+	ENSG00000096384.13	ENST00000371554.1	chr6	44215603	44221620	+	0.821769
ENST00000431951.1	chr2	35949825	35950208	-	ENSG00000136897.6	ENST00000374865.4	chr9	104149915	104160896	-	0.8125
ENST00000418346.1	chr20	29637799	29638060	-	ENSG00000078403.11	ENST00000438473.1	chr10	21940683	22019873	+	0.862595
ENST00000438459.1	chrY	25204177	25205333	+	ENSG00000176979.8	ENST00000341062.5	chr4	165960350	165962665	+	0.816176
ENST00000502867.1	chr4	84398674	84399568	+	ENSG00000102078.11	ENST00000218197.5	chrX	129474026	129507335	+	0.911732
ENST00000427832.1	chr1	111922913	111923195	+	ENSG00000181061.9	ENST00000452906.2	chr3	42826744	42845925	-	0.939929
ENST00000413189.1	chr1	25451544	25451945	-	ENSG00000142089.9	ENST00000399808.4	chr11	319669	321050	-	0.89801
ENST00000528631.1	chr11	124330430	124331381	+	ENSG00000196119.5	ENST00000284287.3	chr11	124439893	124441037	+	0.846639
ENST00000407695.1	chr6	87439426	87439826	-	ENSG00000162244.5	ENST00000466397.1	chr3	52027644	52029879	-	0.80798
ENST00000444413.1	chr8	100352533	100353989	-	ENSG00000005302.12	ENST00000361672.2	chrX	11776410	11793350	+	0.809883
ENST00000494084.1	chr19	16523495	16524387	+	ENSG00000140988.8	ENST00000343262.3	chr16	2012062	2014861	-	0.896976
ENST00000515870.1	chr4	97133430	97134251	+	ENSG00000137076.12	ENST00000314888.9	chr9	35696945	35732392	-	0.649635
ENST00000429844.1	chrX	99410881	99411772	-	ENSG00000205246.4	ENST00000354585.4	chr19	24009921	24010917	+	0.956278
ENST00000436455.1	chr7	13911481	13912138	+	ENSG00000161970.7	ENST00000293842.4	chr17	8280838	8286568	-	0.921114
ENST00000523257.1	chr8	23340529	23341047	-	ENSG00000101152.6	ENST00000360864.4	chr20	62526535	62567384	+	0.905588
ENST00000503894.1	chr5	17647821	17648053	-	ENSG00000064995.12	ENST00000361288.4	chr6	34845555	34855866	-	0.708155
ENST00000512182.1	chr4	108124509	108125081	-	ENSG00000128340.10	ENST00000249071.6	chr22	37621301	37640310	-	0.755672
ENST00000417266.1	chrX	127447259	127448026	+	ENSG00000148303.12	ENST00000323345.6	chr9	136215069	136218281	+	0.786458
ENST00000392115.2	chr6	168167763	168169248	-	ENSG00000100596.1	ENST00000216484.1	chr14	77973272	78083110	-	0.794751
ENST00000524262.1	chr5	170772347	170772634	-	ENSG00000108298.4	ENST00000225430.4	chr17	37356536	37360980	+	0.920139
ENST00000427230.1	chr7	29251916	29252816	+	ENSG00000111704.6	ENST00000229307.4	chr12	7941992	7948655	+	0.955605
ENST00000468802.1	chr3	181565314	181565673	-	ENSG00000157778.4	ENST00000288607.2	chr7	1606966	1609629	-	0.822222
ENST00000507624.1	chr10	91404360	91404980	-	ENSG00000152782.11	ENST00000307534.4	chr10	91342749	91405215	-	1
ENST00000465850.1	chr3	113822096	113822475	-	ENSG00000187990.4	ENST00000244601.3	chr6	26216428	26216872	-	0.842105
ENST00000404330.1	chr6	81083732	81084286	-	ENSG00000215472.3	ENST00000418495.1	chr18	47014858	47018906	-	0.933333
ENST00000412994.1	chr2	95426519	95426861	-	ENSG00000178206.3	ENST00000416266.1	chr2	132044330	132050127	+	0.892128
ENST00000451079.1	chr15	44168047	44168442	-	ENSG00000102309.8	ENST00000218432.5	chrX	71401526	71418187	+	0.972222
ENST00000419888.1	chr20	18763068	18764334	-	ENSG00000156508.12	ENST00000316292.9	chr6	74225473	74230741	-	0.832676
ENST00000434317.1	chr7	102395593	102396386	+	ENSG00000148303.12	ENST00000323345.6	chr9	136215069	136218281	+	0.916877
ENST00000450122.1	chr1	119627531	119628577	-	ENSG00000134597.8	ENST00000305536.6	chrX	129535943	129547317	+	0.933142
ENST00000457002.1	chr20	16566978	16567338	-	ENSG00000089157.10	ENST00000228306.4	chr12	120634510	120639014	-	0.795014
ENST00000448444.1	chr2	101276674	101277087	+	ENSG00000205857.1	ENST00000382119.1	chr12	7917812	7926717	+	0.888889
ENST00000498492.1	chr1	149821966	149822340	-	ENSG00000196374.5	ENST00000359465.4	chr6	27782822	27783267	+	0.858667
ENST00000412776.1	chr2	37375673	37376447	+	ENSG00000152219.4	ENST00000282032.3	chr11	30344598	30359774	+	0.941935
ENST00000420675.1	chrY	26424484	26427287	-	ENSG00000079432.1	ENST00000160740.1	chr19	42788817	42799949	+	0.843643
ENST00000519164.1	chr8	124364421	124364883	+	ENSG00000128951.6	ENST00000331200.2	chr15	48623621	48635570	+	0.784017
ENST00000497612.2	chr5	114600350	114601214	-	ENSG00000140988.8	ENST00000343262.3	chr16	2012062	2014861	-	0.861272
ENST00000434479.1	chr1	235596300	235596539	+	ENSG00000171858.11	ENST00000370562.1	chr20	60962353	60963576	+	0.854167
ENST00000510190.1	chr4	77880013	77880322	-	ENSG00000136810.8	ENST00000374517.5	chr9	113006091	113018920	-	0.945161
ENST00000453002.1	chr17	15947935	15948271	+	ENSG00000137818.6	ENST00000260379.5	chr15	69745123	69748172	+	0.925816
ENST00000427029.1	chr9	30988083	30990570	+	ENSG00000109971.8	ENST00000526110.1	chr11	122928409	122932039	-	0.699711
ENST00000438685.1	chr2	63459588	63460712	-	ENSG00000146410.7	ENST00000420702.1	chr6	136552168	136571449	-	0.831111
ENST00000426746.1	chr2	52298493	52304335	+	ENSG00000188295.9	ENST00000535105.1	chr1	247261406	247267663	-	0.810552
ENST00000319092.5	chr1	117075558	117076714	-	ENSG00000205531.6	ENST00000380542.4	chr11	2965667	3013607	-	0.93172
ENST00000460876.1	chr15	22440223	22440846	-	ENSG00000142937.7	ENST00000396651.3	chr1	45241109	45244451	+	0.947115
ENST00000412459.2	chr5	111181747	111182263	-	ENSG00000205581.6	ENST00000361263.4	chr21	40714242	40718454	-	0.837524
ENST00000526526.1	chr11	101464751	101465665	+	ENSG00000122203.10	ENST00000298569.4	chr5	175773064	175788971	-	0.911475
ENST00000528539.1	chr11	58121477	58121972	-	ENSG00000157851.12	ENST00000288699.6	chr2	27070969	27173219	+	0.802419
ENST00000453682.1	chrX	12862984	12863549	-	ENSG00000132313.9	ENST00000337109.4	chr2	86426580	86440917	+	0.897527
ENST00000431953.1	chr13	64549584	64550555	-	ENSG00000001167.10	ENST00000341376.6	chr6	41040684	41067715	+	0.707819
ENST00000468335.1	chr5	176773074	176773427	+	ENSG00000008988.5	ENST00000523936.1	chr8	56985632	56986915	-	0.875706
ENST00000503587.1	chr4	44535632	44535897	+	ENSG00000023318.7	ENST00000262455.6	chr9	102741461	102861322	-	0.781955
ENST00000431058.1	chr7	54724051	54724427	+	ENSG00000071082.5	ENST00000264258.3	chr2	101618177	101623729	+	0.923077
ENST00000503199.1	chr5	21882694	21884419	+	ENSG00000144381.10	ENST00000388968.3	chr2	198351305	198364771	-	0.973928
ENST00000450823.1	chr21	16862849	16863086	-	ENSG00000172115.4	ENST00000305786.2	chr7	25159710	25164980	-	0.747899
ENST00000335020.2	chr6	116359919	116360658	+	ENSG00000111669.9	ENST00000229270.4	chr12	6976283	6980112	+	0.922973
ENST00000495704.1	chr3	138543905	138545171	+	ENSG00000156508.12	ENST00000316292.9	chr6	74225473	74230741	-	0.906867
ENST00000399168.2	chr13	51735859	51736493	-	ENSG00000122406.6	ENST00000432788.1	chr1	93297597	93307480	+	0.885039
ENST00000440417.1	chr2	225364103	225364817	-	ENSG00000168876.4	ENST00000544253.1	chr11	94227174	94232743	+	0.848951
ENST00000474888.1	chr3	150437784	150438623	-	ENSG00000124562.5	ENST00000244520.5	chr6	34725183	34741571	+	0.87605
ENST00000417035.1	chr2	141655992	141656675	+	ENSG00000180979.4	ENST00000323443.2	chr15	42834720	42841000	-	0.853801
ENST00000488231.1	chr3	109634823	109635787	-	ENSG00000120837.2	ENST00000240055.2	chr12	104510858	104532040	-	0.949838
ENST00000474095.1	chr3	50914143	50915088	-	ENSG00000100380.7	ENST00000216218.3	chr22	41220539	41253026	-	0.844687
ENST00000433516.1	chr3	40740557	40740829	-	ENSG00000198830.6	ENST00000361427.5	chr1	26799010	26802463	+	0.959707
ENST00000521066.1	chr8	16232127	16232592	+	ENSG00000149792.4	ENST00000279242.2	chr11	64889800	64894843	+	0.763948
ENST00000392864.2	chr13	109132574	109134165	+	ENSG00000111727.6	ENST00000229330.3	chr12	104458236	104500294	+	0.744975
ENST00000414328.1	chr1	157043049	157044494	+	ENSG00000170421.5	ENST00000293308.5	chr12	53290971	53298868	-	0.955048
ENST00000508856.1	chr4	165889739	165891154	-	ENSG00000116120.8	ENST00000281828.6	chr2	223435255	223521056	-	0.706215
ENST00000420238.1	chr3	195288085	195288450	-	ENSG00000071082.5	ENST00000409711.1	chr2	101619153	101622829	+	0.846995
ENST00000437554.1	chr7	37860812	37861212	+	ENSG00000237240.2	ENST00000422785.2	chr12	6953963	6960433	-	0.830424
ENST00000419201.1	chr2	139659003	139660317	-	ENSG00000101444.7	ENST00000538132.1	chr20	32868076	32899608	-	0.88289
ENST00000437063.1	chr3	189686819	189687650	-	ENSG00000099810.11	ENST00000380172.3	chr9	21802635	21867077	+	0.93149
ENST00000414898.1	chr1	241995237	241996089	+	ENSG00000089009.8	ENST00000424576.1	chr12	112842997	112847443	-	0.936694
ENST00000478813.1	chr8	81177763	81178390	-	ENSG00000142541.10	ENST00000391857.4	chr19	49990811	49995565	+	0.901274
ENST00000418538.1	chr3	53508727	53509116	-	ENSG00000118181.4	ENST00000527673.1	chr11	118886422	118889400	-	0.851282
ENST00000419465.1	chr9	5855781	5856426	-	ENSG00000147853.10	ENST00000381809.3	chr9	4711155	4741318	-	0.766254
ENST00000492004.1	chr17	27667500	27667840	-	ENSG00000182899.10	ENST00000464167.1	chr3	197676858	197683481	+	0.920821
ENST00000429931.1	chr7	62809532	62810437	-	ENSG00000100075.5	ENST00000215882.5	chr22	19163095	19166343	-	0.833333
ENST00000461814.1	chr3	149179969	149182617	-	ENSG00000082068.4	ENST00000265107.4	chr5	37379314	37753537	+	0.933333
ENST00000418060.1	chr2	83446014	83446229	-	ENSG00000131127.8	ENST00000240499.7	chr4	331624	369047	+	0.967593
ENST00000372214.3	chr9	34223982	34224626	-	ENSG00000142937.7	ENST00000396651.3	chr1	45241109	45244451	+	0.888372
ENST00000455305.1	chr6	132147121	132149553	-	ENSG00000197147.6	ENST00000358200.4	chr1	89990462	90058936	+	0.898479
ENST00000431410.1	chr6	128901258	128902029	-	ENSG00000104529.12	ENST00000528382.1	chr8	144662249	144668987	-	0.345855
ENST00000439053.1	chr2	26324186	26325005	-	ENSG00000140988.8	ENST00000343262.3	chr16	2012062	2014861	-	0.763415
ENST00000512357.1	chr5	17521910	17522504	+	ENSG00000064995.12	ENST00000361288.4	chr6	34845555	34855866	-	0.709244
ENST00000511296.1	chr5	108784050	108784764	-	ENSG00000105993.8	ENST00000441561.1	chr7	157128075	157175030	+	0.719603
ENST00000530684.1	chr11	13173747	13173895	+	ENSG00000117448.9	ENST00000372070.3	chr1	46016215	46035721	+	0.845638
ENST00000445047.1	chrX	23369130	23369567	+	ENSG00000149196.10	ENST00000278483.3	chr11	86013265	86056969	+	0.936073
ENST00000502884.1	chr4	156304259	156305254	-	ENSG00000240505.2	ENST00000261652.2	chr17	16842399	16875402	-	0.742775
ENST00000423883.1	chr10	25936499	25937033	-	ENSG00000111231.2	ENST00000228827.2	chr12	110890292	110906089	-	0.874766
ENST00000429405.1	chr20	4571639	4571946	-	ENSG00000148303.12	ENST00000315731.4	chr9	136215777	136218281	+	0.892857
ENST00000420888.1	chr7	84157438	84158146	-	ENSG00000147604.9	ENST00000396467.1	chr8	74202519	74205868	-	0.856135
ENST00000437690.1	chr3	11275942	11276268	-	ENSG00000163528.8	ENST00000295767.5	chr3	14153580	14166370	-	0.960245
ENST00000413334.1	chr17	73334908	73335228	+	ENSG00000241343.2	ENST00000427805.2	chrX	100645812	100651105	+	0.94704
ENST00000432247.1	chr1	213026622	213026768	+	ENSG00000134419.9	ENST00000322989.4	chr16	18792617	18801656	-	0.857143
ENST00000417698.1	chr4	124666905	124667381	-	ENSG00000122026.6	ENST00000326092.4	chr13	27825734	27830705	+	0.865828
ENST00000374476.3	chr2	177669715	177671065	-	ENSG00000179163.10	ENST00000374479.3	chr1	24171567	24194784	-	0.790526
ENST00000529659.1	chr11	43487942	43488421	+	ENSG00000196262.8	ENST00000468812.1	chr7	44836279	44842716	+	0.85
ENST00000448591.1	chr1	158236543	158237110	-	ENSG00000205581.6	ENST00000380749.5	chr21	40714241	40721126	-	0.874525
ENST00000530977.1	chr11	111734977	111735183	+	ENSG00000174021.6	ENST00000370641.3	chr1	84964012	84972248	-	0.942029
ENST00000429006.1	chrX	69157016	69157867	-	ENSG00000198791.7	ENST00000361272.4	chr8	17086737	17104387	-	0.963615
ENST00000369387.4	chr2	175584636	175585046	+	ENSG00000132475.3	ENST00000254810.3	chr17	73772517	73775860	-	0.785888
ENST00000478038.1	chr16	48611435	48612280	-	ENSG00000140988.8	ENST00000343262.3	chr16	2012062	2014861	-	0.840426
ENST00000435487.1	chr7	56635599	56636551	-	ENSG00000108953.9	ENST00000264335.7	chr17	1247566	1303505	-	0.929746
ENST00000441422.1	chr1	92590858	92592019	+	ENSG00000108946.7	ENST00000536854.1	chr17	66508591	66528899	+	0.870052
ENST00000413478.1	chr4	122998995	122999473	-	ENSG00000138942.9	ENST00000436825.2	chr22	31556197	31602999	+	0.989562
ENST00000412255.1	chr10	64500968	64501145	-	ENSG00000164904.8	ENST00000437170.1	chr5	125880449	125930890	-	0.870787
ENST00000522549.1	chr8	36165763	36165882	+	ENSG00000120254.10	ENST00000367321.3	chr6	151186685	151423023	+	0.9
ENST00000453859.1	chr2	178209171	178209563	+	ENSG00000168148.3	ENST00000366696.1	chr1	228612546	228613026	-	0.643766
ENST00000312966.6	chr10	59972302	59972797	-	ENSG00000133112.12	ENST00000530705.1	chr13	45911313	45915505	-	0.862903
ENST00000518383.1	chr8	55435359	55435857	-	ENSG00000140612.8	ENST00000268220.6	chr15	85212777	85259674	-	0.947896
ENST00000443015.1	chr3	25482655	25482993	-	ENSG00000132475.3	ENST00000254810.3	chr17	73772517	73775860	-	0.713864
ENST00000429273.1	chr7	85010434	85010691	-	ENSG00000088986.5	ENST00000392509.1	chr12	120907660	120936297	+	0.957364
ENST00000448886.1	chr7	143276000	143276165	+	ENSG00000153066.6	ENST00000436567.1	chr16	11814290	11836704	-	0.813253
ENST00000447425.1	chr7	22813265	22813612	-	ENSG00000197728.4	ENST00000356464.4	chr12	56435686	56438005	+	0.979885
ENST00000477341.2	chr8	34731677	34732151	+	ENSG00000122026.6	ENST00000311549.6	chr13	27825446	27830705	+	0.983158
ENST00000401555.1	chr6	3941539	3942032	+	ENSG00000241186.2	ENST00000296145.5	chr3	46618727	46623953	+	0.836032
ENST00000437463.1	chr17	18985725	18988506	+	ENSG00000115919.9	ENST00000264170.4	chr2	143635067	143799890	+	0.845768
ENST00000463506.1	chr15	59817621	59818080	-	ENSG00000122026.6	ENST00000311549.6	chr13	27825446	27830705	+	0.856522
ENST00000413110.1	chr22	36817318	36817689	-	ENSG00000134419.9	ENST00000322989.4	chr16	18792617	18801656	-	0.943548
ENST00000474180.1	chr18	72057119	72057532	-	ENSG00000149806.6	ENST00000529639.1	chr11	64888100	64889945	-	0.932367
ENST00000443431.1	chr7	20883246	20883580	+	ENSG00000197728.4	ENST00000356464.4	chr12	56435686	56438005	+	0.844776
ENST00000491725.1	chr11	61779223	61780074	-	ENSG00000140988.8	ENST00000343262.3	chr16	2012062	2014861	-	0.842723
ENST00000406055.1	chr6	128960333	128960798	-	ENSG00000122026.6	ENST00000311549.6	chr13	27825446	27830705	+	0.886266
ENST00000530970.1	chr11	74363681	74363956	+	ENSG00000132341.5	ENST00000543796.1	chr12	131356424	131362223	+	0.851449
ENST00000457667.1	chrX	112590640	112590843	+	ENSG00000186047.8	ENST00000400393.3	chr13	51286037	51418075	-	0.759804
ENST00000514977.1	chr8	127186430	127187258	-	ENSG00000223638.3	ENST00000434937.2	chr19	56270380	56274541	+	0.72619
ENST00000477545.1	chr13	19254634	19255840	+	ENSG00000147601.7	ENST00000276602.6	chr8	73921099	73960357	+	0.971002
ENST00000441346.1	chr3	36921675	36922220	-	ENSG00000122565.13	ENST00000337620.4	chr7	26240782	26252976	+	0.833333
ENST00000428561.1	chr3	51853216	51853635	+	ENSG00000214681.2	ENST00000446461.1	chr3	51907737	51909600	-	0.778571
ENST00000461109.1	chr17	62385676	62386050	-	ENSG00000071082.5	ENST00000409711.1	chr2	101619153	101622829	+	0.877333
ENST00000518924.1	chr5	169567668	169568944	-	ENSG00000111057.5	ENST00000388835.2	chr12	53342843	53346684	+	0.900548
ENST00000416730.1	chrX	78340433	78341368	+	ENSG00000078589.8	ENST00000171757.2	chrX	78200918	78217451	+	0.751068
ENST00000425765.1	chr10	69510042	69510983	+	ENSG00000198074.4	ENST00000359579.4	chr7	134212344	134226160	+	0.952229
ENST00000455035.1	chrX	135377849	135382457	-	ENSG00000102572.9	ENST00000397517.2	chr13	99102455	99229117	-	0.925639
ENST00000507090.1	chr4	13338106	13339921	+	ENSG00000096384.13	ENST00000353801.3	chr6	44214824	44221620	+	0.944154
ENST00000445341.1	chr21	24473545	24475396	+	ENSG00000120458.5	ENST00000239614.4	chr11	124636394	124670569	-	0.833333
ENST00000419176.1	chr10	70434113	70434857	+	ENSG00000145425.5	ENST00000514682.1	chr4	152020781	152025789	+	0.90604
ENST00000453110.1	chrX	58011120	58012567	+	ENSG00000170421.5	ENST00000293308.5	chr12	53290971	53298868	-	0.90953
ENST00000453860.1	chr1	37095936	37096458	+	ENSG00000087086.7	ENST00000331825.5	chr19	49468566	49470135	+	0.717017
ENST00000504105.1	chr5	98169086	98169415	+	ENSG00000113712.10	ENST00000377843.2	chr5	148874845	148931007	-	0.90303
ENST00000432945.1	chrX	9833133	9833583	-	ENSG00000205581.6	ENST00000361263.4	chr21	40714242	40718454	-	0.813747
ENST00000435701.1	chr10	28627483	28629871	-	ENSG00000181896.6	ENST00000318110.5	chr19	19779605	19791761	+	0.716279
ENST00000474389.1	chr3	133479144	133481207	+	ENSG00000123983.9	ENST00000357430.3	chr2	223725652	223809357	+	0.837246
ENST00000519377.1	chr8	109664602	109665544	+	ENSG00000165275.5	ENST00000297994.3	chr9	37753814	37778969	+	0.818664
ENST00000484096.1	chr16	85849479	85850142	-	ENSG00000198755.6	ENST00000322203.6	chr6	35436185	35438562	+	0.909639
ENST00000442539.1	chr3	37789601	37790391	+	ENSG00000122026.6	ENST00000272274.4	chr13	27825716	27830705	+	0.566372
ENST00000417985.1	chrX	46147451	46148563	-	ENSG00000075624.8	ENST00000331789.5	chr7	5566782	5570340	-	0.873315
ENST00000429825.1	chr2	44497760	44498247	+	ENSG00000197958.8	ENST00000361436.5	chr9	130209953	130213684	-	0.940574
ENST00000467608.1	chr7	156880649	156881237	-	ENSG00000123505.9	ENST00000368882.3	chr6	111195973	111216916	+	0.787776
ENST00000417061.1	chr1	2283095	2283298	-	ENSG00000128739.14	ENST00000400100.1	chr15	25068794	25223729	+	0.892157
ENST00000508796.1	chr4	185986135	185986477	+	ENSG00000163584.12	ENST00000295830.7	chr3	170582664	170587984	-	0.830904
ENST00000437364.1	chr1	47357301	47358486	+	ENSG00000167553.8	ENST00000301072.5	chr12	49658865	49667114	+	0.865093
ENST00000417653.1	chr9	19460882	19461323	-	ENSG00000140941.6	ENST00000268607.5	chr16	87425406	87438385	+	0.91629
ENST00000502634.1	chr5	20304154	20305557	-	ENSG00000093000.13	ENST00000347635.3	chr22	45559722	45583892	+	0.9651
ENST00000528532.1	chr11	89433932	89434493	+	ENSG00000108312.10	ENST00000302904.4	chr17	42282401	42298994	-	0.704626
ENST00000504507.1	chr5	64546954	64547611	-	ENSG00000197713.9	ENST00000359429.6	chr2	210867289	210886300	+	0.759878
ENST00000525536.1	chr11	134186676	134186982	-	ENSG00000186009.3	ENST00000335288.3	chr13	114303173	114312501	-	0.739414
ENST00000425197.2	chr8	49297150	49297609	+	ENSG00000162244.5	ENST00000294189.5	chr3	52027644	52029958	-	0.928261
ENST00000413158.1	chr7	16928245	16928509	+	ENSG00000106355.5	ENST00000409782.1	chr7	32526652	32529992	-	0.89434
ENST00000506771.1	chr5	117054935	117057792	-	ENSG00000153707.9	ENST00000397611.3	chr9	8314247	8733946	-	0.849892
ENST00000451332.1	chrX	41607475	41607858	+	ENSG00000134419.9	ENST00000322989.4	chr16	18792617	18801656	-	0.872396
ENST00000445100.1	chr9	21231265	21231852	-	ENSG00000177047.5	ENST00000380229.2	chr9	21140631	21142144	-	0.838435
ENST00000512207.1	chr5	29104987	29105545	+	ENSG00000119711.7	ENST00000350259.3	chr14	74526891	74551196	-	0.823077
ENST00000490340.1	chr8	130876724	130877298	+	ENSG00000174748.11	ENST00000456530.2	chr3	23958630	23965183	+	0.810435
ENST00000534607.1	chr11	124661124	124661556	+	ENSG00000149564.7	ENST00000278927.5	chr11	124623019	124632180	-	0.845266
ENST00000456660.1	chr7	53929926	53931032	+	ENSG00000147874.6	ENST00000380502.3	chr9	19053141	19103117	-	0.98645
ENST00000438304.1	chr1	211833531	211834619	-	ENSG00000160752.10	ENST00000356657.6	chr1	155278707	155290456	+	0.906336
ENST00000460682.1	chr8	57500966	57501259	+	ENSG00000145592.9	ENST00000274242.5	chr5	40825364	40835437	-	0.94898
ENST00000431233.1	chr7	104466783	104467243	+	ENSG00000122203.10	ENST00000393725.2	chr5	175773065	175788768	-	0.841649
ENST00000441771.1	chr3	41900842	41901086	-	ENSG00000113732.4	ENST00000519374.1	chr5	172410760	172462448	+	0.897959
ENST00000415181.1	chr7	63545938	63546954	+	ENSG00000176979.8	ENST00000341062.5	chr4	165960350	165962665	+	0.856745
ENST00000381380.3	chr17	17325995	17327018	+	ENSG00000072201.8	ENST00000263925.7	chr4	54326623	54457783	-	0.827148
ENST00000514668.2	chr5	56416623	56418408	+	ENSG00000133641.10	ENST00000356891.2	chr12	88429268	88443936	+	0.887117
ENST00000403169.1	chr6	16171837	16172262	+	ENSG00000198015.6	ENST00000393128.3	chr12	93861270	93896431	+	0.842723
ENST00000520205.1	chr8	88587826	88588736	-	ENSG00000009844.9	ENST00000367630.3	chr6	142468367	142542085	+	0.801317
ENST00000510627.1	chr5	93076286	93077135	-	ENSG00000204531.7	ENST00000259915.6	chr6	31132128	31138470	-	0.703529
ENST00000489592.1	chr11	4040178	4040348	+	ENSG00000213741.3	ENST00000245458.6	chr14	50050290	50053094	-	0.865497
ENST00000455475.1	chr1	198648263	198649162	-	ENSG00000089220.3	ENST00000261313.2	chr12	118573663	118583389	+	0.884268
ENST00000416712.2	chr4	49563302	49563487	-	ENSG00000178996.8	ENST00000343017.6	chr5	53813589	53842415	+	0.77957
ENST00000438852.1	chr21	40607312	40607946	-	ENSG00000144401.9	ENST00000406927.2	chr2	208477467	208490102	-	0.861417
ENST00000406079.1	chr6	43673686	43674488	-	ENSG00000120699.6	ENST00000389704.3	chr13	37574678	37583538	+	0.846824
ENST00000447108.1	chr10	44236885	44237798	-	ENSG00000154582.11	ENST00000518127.1	chr8	74857354	74884522	-	0.876254
ENST00000447385.1	chr2	198398527	198398689	+	ENSG00000198918.6	ENST00000422326.1	chrX	118920510	118925296	-	0.90184
ENST00000450455.1	chr1	168179854	168180207	+	ENSG00000109475.12	ENST00000394665.1	chr4	109541746	109546411	+	0.940678
ENST00000423792.1	chr1	236449276	236450260	-	ENSG00000100442.5	ENST00000216330.3	chr14	45584803	45604522	-	0.878049
ENST00000436426.1	chr3	10099657	10099971	-	ENSG00000172115.4	ENST00000305786.2	chr7	25159710	25164980	-	0.91746
ENST00000420012.1	chr22	19618273	19621097	-	ENSG00000179021.4	ENST00000318887.3	chr3	88198893	88207118	+	0.817419
ENST00000518830.1	chr8	120492517	120493015	-	ENSG00000074657.8	ENST00000336078.4	chr18	56529832	56653712	+	0.967936
ENST00000404698.1	chr6	114340785	114341647	-	ENSG00000213965.2	ENST00000397061.2	chr19	33182867	33204701	+	0.830631
ENST00000475092.1	chr2	43902517	43903461	-	ENSG00000171155.7	ENST00000304661.5	chrX	119759648	119764005	-	0.778836
ENST00000420880.1	chr2	145512343	145513565	-	ENSG00000127990.11	ENST00000415788.2	chr7	94217623	94285498	-	0.828291
ENST00000440782.1	chr1	657465	660287	+	ENSG00000079432.1	ENST00000160740.1	chr19	42788817	42799949	+	0.831385
ENST00000436998.1	chr2	63849312	63849965	-	ENSG00000169230.5	ENST00000303204.4	chr5	176730775	176733960	+	0.984709
ENST00000446424.1	chr7	97537568	97537736	+	ENSG00000138326.12	ENST00000360830.4	chr10	79793641	79800455	+	0.83432
ENST00000508316.1	chr5	130329947	130331857	+	ENSG00000105705.8	ENST00000247001.3	chr19	19387323	19431318	-	0.889571
ENST00000473537.1	chr3	116364749	116365574	-	ENSG00000082153.12	ENST00000409600.1	chr2	201676269	201688569	+	0.997579
ENST00000415533.1	chr3	1771754	1772158	+	ENSG00000198242.7	ENST00000422514.2	chr17	27046411	27051377	+	0.832099
ENST00000540749.1	chr12	9280379	9281241	+	ENSG00000128422.10	ENST00000311208.8	chr17	39775689	39780829	-	0.711472
ENST00000462503.1	chr8	34180510	34181160	-	ENSG00000198755.6	ENST00000322203.6	chr6	35436185	35438562	+	0.915515
ENST00000484754.1	chr3	140621036	140621493	+	ENSG00000198242.7	ENST00000422514.2	chr17	27046411	27051377	+	0.91048
ENST00000494195.1	chr3	133889331	133889929	+	ENSG00000029993.10	ENST00000325307.7	chrX	150151759	150159248	+	0.833055
ENST00000531826.1	chr11	49426650	49426876	-	ENSG00000077498.7	ENST00000263321.4	chr11	88910620	89028908	+	0.991189
ENST00000502510.1	chr5	179961184	179961642	-	ENSG00000102007.6	ENST00000376327.5	chrX	49028273	49031588	+	0.847495
ENST00000519384.1	chr8	33397703	33398011	+	ENSG00000147403.12	ENST00000424325.2	chrX	153626571	153630680	+	0.909385
ENST00000436725.1	chr3	28489216	28489564	+	ENSG00000109475.12	ENST00000394668.2	chr4	109541812	109551568	+	0.922636
ENST00000443639.1	chrX	52764992	52765196	-	ENSG00000065154.7	ENST00000368845.5	chr10	126085876	126107505	-	0.921951
ENST00000467059.1	chr3	81416141	81417172	-	ENSG00000128253.9	ENST00000248983.4	chr22	32586422	32600718	-	0.681202
ENST00000520566.1	chr5	172083525	172083716	-	ENSG00000232112.3	ENST00000438607.2	chr3	48481667	48485616	+	0.984375
ENST00000504640.1	chr4	88331881	88332540	+	ENSG00000115364.9	ENST00000393909.2	chr2	75873909	75884986	+	0.893939
ENST00000443360.1	chr1	233424614	233425193	-	ENSG00000171863.8	ENST00000304921.5	chr2	3622795	3628509	+	0.956897
ENST00000519180.1	chr5	178349065	178349717	+	ENSG00000151665.8	ENST00000281382.6	chr2	46808076	46844258	-	0.963247
ENST00000458691.1	chrX	52861754	52862949	-	ENSG00000156976.10	ENST00000323963.5	chr3	186501336	186507689	+	0.955686
ENST00000488538.1	chr4	83411976	83412788	-	ENSG00000148303.12	ENST00000323345.6	chr9	136215069	136218281	+	0.904059
ENST00000531577.1	chr11	59030862	59031275	-	ENSG00000140107.9	ENST00000361529.2	chr14	100789679	100796715	+	0.821256
ENST00000427198.1	chr13	52034661	52035532	+	ENSG00000198034.6	ENST00000316084.6	chrX	71491892	71497150	-	0.938073
ENST00000425131.1	chr19	45268405	45268721	+	ENSG00000147403.12	ENST00000424325.2	chrX	153626571	153630680	+	0.84858
ENST00000543668.1	chr12	18645985	18646657	+	ENSG00000196345.6	ENST00000273320.3	chr3	44596700	44613650	+	0.769688
ENST00000446146.1	chr9	74890369	74890889	+	ENSG00000011052.13	ENST00000393199.2	chr17	49230997	49249103	+	0.88361
ENST00000483696.1	chr4	63114012	63114488	+	ENSG00000122026.6	ENST00000311549.6	chr13	27825446	27830705	+	0.830189
ENST00000442797.1	chr22	17318412	17318556	+	ENSG00000046653.10	ENST00000454189.2	chrX	13789575	13956757	-	0.910345
ENST00000436861.1	chr20	49530268	49530948	+	ENSG00000101843.13	ENST00000217958.3	chrX	107327437	107334848	-	0.917768
ENST00000508335.1	chr8	68045789	68048146	-	ENSG00000221944.3	ENST00000408957.3	chr2	233412779	233415226	-	0.631043
ENST00000412556.1	chr2	231589858	231590118	-	ENSG00000175334.3	ENST00000312175.2	chr11	65769550	65771620	+	0.984674
ENST00000519121.1	chr5	78004557	78011905	-	ENSG00000145425.5	ENST00000514682.1	chr4	152020781	152025789	+	0.91024
ENST00000505749.1	chr5	130344276	130344435	+	ENSG00000108829.8	ENST00000225972.7	chr17	48458599	48474914	-	0.88125
ENST00000407115.1	chr6	150225376	150227553	+	ENSG00000173269.5	ENST00000372027.4	chr10	88695297	88717372	-	0.841136
ENST00000461458.1	chr14	90833041	90833523	-	ENSG00000122026.6	ENST00000311549.6	chr13	27825446	27830705	+	0.983437
ENST00000507326.1	chr4	95117395	95117664	-	ENSG00000029993.10	ENST00000325307.7	chrX	150151759	150159248	+	0.918519
ENST00000447172.1	chr13	19271143	19271647	+	ENSG00000160256.8	ENST00000291634.6	chr21	46359925	46396904	+	0.990099
ENST00000438721.1	chr7	31158898	31159186	-	ENSG00000163683.6	ENST00000295958.4	chr4	39552541	39640710	-	0.83391
ENST00000505272.1	chr4	30008573	30009938	-	ENSG00000164733.13	ENST00000434271.1	chr8	11700033	11725646	-	0.814516
ENST00000358001.4	chrX	18856827	18857570	-	ENSG00000104164.4	ENST00000220531.2	chr15	45879417	45901909	+	0.876344
ENST00000431298.1	chr2	218625270	218626014	-	ENSG00000146223.9	ENST00000493763.1	chr6	42847373	42857634	+	0.93557
ENST00000504736.1	chr4	69749606	69750176	-	ENSG00000144228.4	ENST00000280098.4	chr2	139259371	139331117	+	0.901926
ENST00000295493.3	chr7	42958340	42959683	+	ENSG00000023734.6	ENST00000419869.2	chr12	16035329	16056412	+	0.908917
ENST00000442090.1	chrY	24214967	24215298	+	ENSG00000154582.11	ENST00000518127.1	chr8	74857354	74884522	-	0.783133
ENST00000515543.1	chr4	159947291	159947679	+	ENSG00000164687.6	ENST00000297258.6	chr8	82192598	82197012	+	0.912596
ENST00000399931.2	chrX	46584599	46585253	-	ENSG00000086065.8	ENST00000223500.7	chr9	33264940	33281525	+	0.949618
ENST00000438328.1	chr21	24254903	24256321	+	ENSG00000174842.11	ENST00000370360.3	chr1	92711959	92764533	-	0.786963
ENST00000520243.1	chr8	48114096	48114396	-	ENSG00000211638.2	ENST00000390283.2	chr22	22453110	22453622	+	0.890365
ENST00000432206.1	chr20	13373324	13374321	+	ENSG00000111640.8	ENST00000229239.5	chr12	6643093	6647537	+	0.8998
ENST00000515313.1	chr8	101562952	101563941	-	ENSG00000111640.8	ENST00000229239.5	chr12	6643093	6647537	+	0.887879
ENST00000435433.1	chrY	14442350	14443562	+	ENSG00000137414.4	ENST00000259963.3	chr6	17600586	17611950	+	0.852432
ENST00000423198.1	chr2	88268128	88268490	+	ENSG00000065518.7	ENST00000485064.1	chr3	120315175	120321171	+	0.873278
ENST00000411843.1	chr2	63911439	63911844	+	ENSG00000131469.7	ENST00000253788.4	chr17	41150446	41154956	+	0.938424
ENST00000388967.3	chr3	36808608	36810290	-	ENSG00000144381.10	ENST00000388968.3	chr2	198351305	198364771	-	0.939394
ENST00000513483.1	chr5	101152212	101152484	-	ENSG00000174667.2	ENST00000308682.2	chr19	9324526	9325542	-	0.805861
ENST00000509905.1	chr5	75048395	75049304	-	ENSG00000005022.5	ENST00000317881.8	chrX	118602363	118605282	+	0.818681
ENST00000407266.1	chr6	35575405	35575711	+	ENSG00000130255.6	ENST00000394580.1	chr19	5690346	5691674	+	0.869707
ENST00000455429.1	chr10	81800383	81800799	-	ENSG00000197223.7	ENST00000355848.3	chr2	68268262	68290115	-	0.961631
ENST00000430475.1	chr10	38450498	38450677	+	ENSG00000148498.11	ENST00000544292.1	chr10	34601192	34715659	-	0.788889
ENST00000427504.1	chr3	14614359	14616299	-	ENSG00000007384.9	ENST00000262316.6	chr16	108058	122629	-	0.924781
ENST00000473404.1	chr12	64154141	64154392	-	ENSG00000177954.7	ENST00000368567.4	chr1	153963235	153964626	+	0.853175
ENST00000338790.4	chr17	18296794	18304275	+	ENSG00000197681.7	ENST00000518551.1	chr17	36337711	36347030	-	0.832558
ENST00000325612.5	chr6	39926153	39926572	-	ENSG00000125691.7	ENST00000394332.1	chr17	37004118	37009975	-	0.957143
ENST00000428824.2	chr12	8286376	8287449	-	ENSG00000204531.7	ENST00000259915.6	chr6	31132128	31138470	-	0.981378
ENST00000433284.1	chr22	49609837	49610173	-	ENSG00000136942.9	ENST00000348462.3	chr9	127620163	127624240	-	0.905045
ENST00000426806.1	chr7	102792454	102792772	-	ENSG00000198242.7	ENST00000422514.2	chr17	27046411	27051377	+	0.913208
ENST00000412199.1	chr3	58497037	58497403	+	ENSG00000131469.7	ENST00000253788.4	chr17	41150446	41154956	+	0.850136
ENST00000438821.1	chr2	203638748	203639083	-	ENSG00000145337.4	ENST00000273968.4	chr4	89442136	89444964	-	0.943452
ENST00000420753.2	chr2	110769842	110770178	-	ENSG00000197701.7	ENST00000509152.2	chr4	53198	68392	+	0.777448
ENST00000460975.1	chr3	182668571	182674095	-	ENSG00000155621.8	ENST00000377031.3	chr9	74526461	74598166	+	0.86372
ENST00000467631.1	chr3	161042701	161044007	-	ENSG00000254772.2	ENST00000378019.3	chr11	62327075	62342401	-	0.875287
ENST00000427282.1	chr1	203804708	203805040	-	ENSG00000182899.10	ENST00000464167.1	chr3	197676858	197683481	+	0.915916
ENST00000445491.1	chr19	54958008	54958225	+	ENSG00000164167.5	ENST00000502781.1	chr4	147096881	147111198	+	0.866972
ENST00000428659.1	chr13	46126998	46127271	-	ENSG00000100575.7	ENST00000395159.1	chr14	58875214	58894232	-	0.905109
ENST00000512142.1	chr4	49205177	49205705	-	ENSG00000178996.8	ENST00000343017.6	chr5	53813589	53842415	+	0.759924
ENST00000447420.1	chr1	33452553	33453834	+	ENSG00000140988.8	ENST00000343262.3	chr16	2012062	2014861	-	0.826188
ENST00000527814.1	chr11	89808015	89808264	-	ENSG00000141446.5	ENST00000383276.1	chr18	19109264	19180845	-	0.928
ENST00000453244.1	chr13	35825207	35825966	+	ENSG00000167085.6	ENST00000300408.3	chr17	47481414	47492242	-	0.807895
ENST00000462701.1	chr11	71380566	71381343	+	ENSG00000145425.5	ENST00000514682.1	chr4	152020781	152025789	+	0.904884
ENST00000439946.1	chr1	199846106	199846686	+	ENSG00000189043.5	ENST00000339600.5	chr7	10971578	10979883	-	0.856574
ENST00000510179.1	chr13	46844212	46844752	+	ENSG00000119328.7	ENST00000322940.6	chr9	111696461	111703235	+	0.94085
ENST00000412546.1	chrX	85736535	85736816	+	ENSG00000119616.6	ENST00000341162.3	chr14	75179850	75203383	+	0.819149
ENST00000455287.1	chr6	29044350	29044945	-	ENSG00000152700.8	ENST00000505758.1	chr5	133942727	133968459	-	0.624161
ENST00000418805.1	chr2	195319305	195319866	-	ENSG00000215126.5	ENST00000377391.3	chr9	42671887	42714962	+	0.701068
ENST00000427811.1	chr9	88747566	88747766	+	ENSG00000164096.10	ENST00000399075.4	chr4	120218207	120225600	-	0.800995
ENST00000436366.1	chr1	111980136	111980659	+	ENSG00000184182.12	ENST00000409633.1	chr2	238875656	238950186	+	0.76145
ENST00000423389.1	chr21	26403318	26403842	-	ENSG00000225932.3	ENST00000486333.1	chr7	143880559	143883146	+	0.681905
ENST00000525742.1	chr11	49913814	49915329	-	ENSG00000164236.6	ENST00000296657.4	chr5	10564495	10650308	+	0.635884
ENST00000450289.1	chr10	47396223	47396822	+	ENSG00000106615.5	ENST00000262187.5	chr7	151163098	151217010	-	0.986667
ENST00000514817.1	chr4	66008535	66011481	-	ENSG00000140598.8	ENST00000268206.6	chr15	82422561	82555104	-	0.746313
ENST00000430731.1	chr22	25082135	25082646	+	ENSG00000162980.11	ENST00000295087.8	chr2	152655316	152685002	-	0.941406
ENST00000504319.1	chr8	94951592	94955105	-	ENSG00000106588.6	ENST00000223321.4	chr7	42956460	42971822	-	0.877551
ENST00000448974.1	chr7	37156384	37156790	+	ENSG00000184779.7	ENST00000330339.7	chr15	82821158	82824972	-	0.818182
ENST00000442667.1	chr9	14593575	14594181	+	ENSG00000170779.9	ENST00000336219.2	chr14	105475910	105487425	-	0.723229
ENST00000474399.2	chr4	105807275	105808112	-	ENSG00000089009.8	ENST00000424576.1	chr12	112842997	112847443	-	0.830549
ENST00000462007.1	chr17	37011567	37011923	+	ENSG00000008988.5	ENST00000519807.1	chr8	56979854	56987068	-	0.921569
ENST00000418778.1	chr13	75402690	75404217	+	ENSG00000101782.9	ENST00000339486.3	chr18	21032787	21063104	+	0.856021
ENST00000328713.5	chr1	215044077	215045059	+	ENSG00000111640.8	ENST00000229239.5	chr12	6643093	6647537	+	0.842319
ENST00000508390.1	chr3	131245291	131246023	+	ENSG00000126453.4	ENST00000246785.2	chr19	50168399	50177172	+	0.929059
ENST00000505515.1	chr4	117300075	117300425	+	ENSG00000173113.2	ENST00000539854.1	chr11	64084168	64085025	-	0.803419
ENST00000411918.1	chr9	66058835	66060164	+	ENSG00000152234.7	ENST00000282050.2	chr18	43664110	43684199	-	0.927068
ENST00000494130.1	chr12	48881729	48882191	+	ENSG00000124614.9	ENST00000344700.3	chr6	34385231	34392998	-	0.917927
ENST00000508037.1	chr5	111788400	111788686	-	ENSG00000029993.10	ENST00000325307.7	chrX	150151759	150159248	+	0.885017
ENST00000492623.1	chr12	80496679	80497113	-	ENSG00000161970.7	ENST00000293842.4	chr17	8280838	8286568	-	0.965517
ENST00000515599.1	chr5	146085944	146087163	-	ENSG00000170421.5	ENST00000293308.5	chr12	53290971	53298868	-	0.929508
ENST00000507707.1	chr5	42465502	42468970	-	ENSG00000142864.10	ENST00000370995.2	chr1	67876721	67896069	-	0.928112
ENST00000433537.1	chr13	68875737	68877434	-	ENSG00000135486.10	ENST00000330752.6	chr12	54674488	54679028	+	0.83603
ENST00000521750.1	chr8	103633896	103634541	-	ENSG00000204531.7	ENST00000259915.6	chr6	31132128	31138470	-	0.818885
ENST00000443027.1	chr7	9765870	9767901	+	ENSG00000160111.6	ENST00000443236.1	chr19	17003758	17137625	-	0.98622
ENST00000435991.1	chrX	75875897	75876960	-	ENSG00000113597.12	ENST00000231526.4	chr5	64920867	64961896	+	0.716165
ENST00000489915.1	chr18	6462143	6463009	-	ENSG00000089009.8	ENST00000202773.8	chr12	112842997	112847443	-	0.99308
ENST00000425761.1	chr6	50880425	50880969	-	ENSG00000167996.10	ENST00000273550.7	chr11	61731757	61735132	-	0.957798
ENST00000417594.1	chr13	99602011	99602701	-	ENSG00000147604.9	ENST00000396467.1	chr8	74202519	74205868	-	0.69754
ENST00000482574.1	chr4	33969796	33970148	+	ENSG00000145425.5	ENST00000322686.6	chr4	152020781	152025069	+	0.739377
ENST00000428803.1	chr1	8846262	8846994	-	ENSG00000147604.9	ENST00000396467.1	chr8	74202519	74205868	-	0.933151
ENST00000331267.5	chrX	100594905	100595922	+	ENSG00000122026.6	ENST00000311549.6	chr13	27825446	27830705	+	0.906926
ENST00000440661.1	chr2	203638443	203638658	-	ENSG00000145337.4	ENST00000273968.4	chr4	89442136	89444964	-	0.944444
ENST00000510090.1	chr4	70212327	70223895	+	ENSG00000135220.6	ENST00000251566.4	chr4	69794181	69817509	-	0.931612
ENST00000478954.1	chr7	150209647	150210927	-	ENSG00000082146.6	ENST00000194530.3	chr2	202316392	202345569	+	0.959407
ENST00000467186.1	chr3	125474929	125475305	+	ENSG00000149823.3	ENST00000279281.3	chr11	64863631	64879332	+	0.912467
ENST00000507570.1	chr5	75576781	75577092	+	ENSG00000105185.5	ENST00000221784.3	chr19	33072104	33078322	+	0.955128
ENST00000484903.2	chr3	124580941	124582164	-	ENSG00000074800.8	ENST00000234590.4	chr1	8921061	8938749	-	0.749183
ENST00000398672.2	chrX	73616704	73619385	-	ENSG00000137492.3	ENST00000260045.3	chr11	76061000	76091986	-	0.950113
ENST00000453641.1	chr9	128026124	128026369	-	ENSG00000124614.9	ENST00000344700.3	chr6	34385231	34392998	-	0.96748
ENST00000395315.2	chr2	54756480	54756938	+	ENSG00000198242.7	ENST00000394935.3	chr17	27047282	27050951	+	0.910675
ENST00000524174.1	chr8	23492389	23493020	-	ENSG00000139146.8	ENST00000337682.4	chr12	31433518	31479306	-	0.873418
ENST00000475874.1	chr19	34787181	34787645	-	ENSG00000162244.5	ENST00000466397.1	chr3	52027644	52029879	-	0.948387
ENST00000482557.1	chr16	68511139	68511474	-	ENSG00000182899.10	ENST00000464167.1	chr3	197676858	197683481	+	0.892857
ENST00000402666.1	chr6	87779874	87780179	-	ENSG00000122026.6	ENST00000311549.6	chr13	27825446	27830705	+	0.928105
ENST00000330492.4	chr13	19300846	19301554	+	ENSG00000117519.11	ENST00000538964.1	chr1	95362766	95392638	-	0.669958
ENST00000511357.2	chr8	53887671	53888676	-	ENSG00000121481.6	ENST00000367510.3	chr1	185014496	185071740	+	0.719682
ENST00000464473.1	chr20	41859400	41859900	+	ENSG00000196262.8	ENST00000468812.1	chr7	44836279	44842716	+	0.916168
ENST00000526502.1	chr8	12236580	12237774	-	ENSG00000223443.2	ENST00000333796.3	chr8	11994677	11996586	-	0.961506
ENST00000449274.1	chr7	77090775	77091456	+	ENSG00000187210.8	ENST00000442371.1	chr9	79056582	79122330	+	0.83871
ENST00000454831.1	chr1	82022806	82023517	-	ENSG00000118579.6	ENST00000503945.1	chr4	17616287	17627477	+	0.831094
ENST00000494341.1	chr12	12491710	12492185	+	ENSG00000198242.7	ENST00000422514.2	chr17	27046411	27051377	+	0.762605
ENST00000510579.1	chr4	126644422	126645371	-	ENSG00000106609.11	ENST00000341567.4	chr7	66386212	66423538	+	0.829474
ENST00000453465.1	chr10	21913521	21915215	-	ENSG00000125944.12	ENST00000374616.3	chr1	23636276	23670803	-	0.938053
ENST00000521814.1	chr8	81507050	81507938	-	ENSG00000122696.8	ENST00000242275.6	chr9	37887648	37904130	-	0.949381
ENST00000481681.1	chr5	43666868	43667334	-	ENSG00000162244.5	ENST00000466397.1	chr3	52027644	52029879	-	0.970021
ENST00000421567.1	chr2	111118185	111121314	-	ENSG00000074657.8	ENST00000336078.4	chr18	56529832	56653712	+	0.9377
ENST00000413598.1	chr7	121059126	121059899	+	ENSG00000153551.9	ENST00000349718.4	chr3	32433190	32496322	+	0.770335
ENST00000517740.1	chr8	125313556	125314045	+	ENSG00000181449.2	ENST00000325404.1	chr3	181429722	181432221	+	0.908163
ENST00000510094.1	chr4	3314239	3314577	+	ENSG00000171405.8	ENST00000375503.3	chrX	52841228	52847261	+	0.846608
ENST00000454758.1	chr10	76504144	76504465	-	ENSG00000105058.6	ENST00000263384.6	chr19	16296235	16302855	+	0.872671
ENST00000483523.1	chr18	24935370	24935728	-	ENSG00000221983.2	ENST00000442744.1	chr19	18682614	18688269	+	0.752089
ENST00000425442.1	chr2	8743212	8743489	+	ENSG00000182004.8	ENST00000414487.2	chr1	203830743	203839678	+	0.953237
ENST00000515074.1	chr4	163243340	163245059	+	ENSG00000065911.7	ENST00000394053.2	chr2	74425689	74444692	+	0.82439
ENST00000403291.1	chr6	160133833	160135017	-	ENSG00000126945.7	ENST00000457902.1	chrX	100663207	100668825	+	0.81097
ENST00000480555.1	chr12	46397821	46398468	-	ENSG00000142541.10	ENST00000391857.4	chr19	49990811	49995565	+	0.726852
ENST00000436830.1	chrX	101261856	101262267	+	ENSG00000163632.8	ENST00000295896.8	chr3	63805038	63834312	+	0.842233
ENST00000528228.1	chr8	14166542	14167181	+	ENSG00000151247.8	ENST00000450253.2	chr4	99792835	99851788	-	0.951562
ENST00000401435.1	chr6	80146625	80146884	-	ENSG00000155368.12	ENST00000311521.4	chr2	120124646	120130122	+	0.903846
ENST00000398028.2	chr6	151148805	151149336	+	ENSG00000115539.9	ENST00000264254.6	chr2	101179152	101193197	+	0.969925
ENST00000520373.1	chr8	30840975	30841837	-	ENSG00000123684.8	ENST00000366997.4	chr1	211916799	212004114	-	0.929316
ENST00000441378.1	chr2	232120810	232121019	+	ENSG00000233927.2	ENST00000449223.2	chr19	8386384	8387809	+	0.995238
ENST00000464124.2	chr5	124144521	124144926	-	ENSG00000108107.6	ENST00000426763.1	chr19	55897300	55903449	+	0.935961
ENST00000411933.1	chr20	35650146	35650387	-	ENSG00000145425.5	ENST00000515818.1	chr4	152020781	152025390	+	0.867769
ENST00000451056.1	chr17	1761333	1761740	-	ENSG00000143252.9	ENST00000367975.2	chr1	161284047	161332984	+	0.992647
ENST00000515049.1	chr17	48016486	48017183	+	ENSG00000053372.4	ENST00000330263.4	chr1	19578033	19586622	+	0.936963
ENST00000526467.1	chr11	124471480	124472134	+	ENSG00000196119.5	ENST00000284287.3	chr11	124439893	124441037	+	0.746565
ENST00000453854.1	chrX	50674114	50674548	-	ENSG00000189403.9	ENST00000405805.1	chr13	31032884	31191734	-	0.868966
ENST00000446498.1	chr1	26781144	26781678	-	ENSG00000215472.3	ENST00000418495.1	chr18	47014858	47018906	-	0.95514
ENST00000526613.1	chr8	12533544	12533898	-	ENSG00000149823.3	ENST00000528588.1	chr11	64856796	64875100	+	0.901408
ENST00000541242.1	chr12	6586880	6589373	+	ENSG00000057294.7	ENST00000070846.5	chr12	32943680	33049780	-	0.94988
ENST00000521828.1	chr8	33499099	33499457	-	ENSG00000106245.5	ENST00000403633.2	chr7	99006264	99017239	+	0.746518
ENST00000456871.1	chr10	14765170	14766054	-	ENSG00000168028.8	ENST00000458478.1	chr3	39448224	39453550	+	0.80791
ENST00000527404.1	chr11	86805776	86807627	-	ENSG00000101966.8	ENST00000430625.1	chrX	122993728	123019980	+	0.24784
ENST00000417868.1	chr1	153824582	153825890	-	ENSG00000147872.5	ENST00000411567.1	chr9	19115760	19127573	-	0.753247
ENST00000446970.1	chr13	87871259	87871524	+	ENSG00000170315.6	ENST00000302182.3	chr17	16284113	16286054	+	0.902256
ENST00000537175.1	chr12	16552208	16555340	-	ENSG00000092201.3	ENST00000216297.2	chr14	21819631	21852425	-	0.954357
ENST00000520775.1	chr8	5706219	5707214	+	ENSG00000152382.5	ENST00000367874.4	chr1	166825747	166845564	-	0.915663
ENST00000526582.1	chr11	90847892	90849119	-	ENSG00000117859.14	ENST00000371710.3	chr1	52082547	52254889	+	0.916938
ENST00000442276.1	chr1	35975343	35977039	+	ENSG00000096654.10	ENST00000211936.6	chr6	27418522	27440897	-	0.740778
ENST00000457490.1	chr2	24557381	24558021	+	ENSG00000241343.2	ENST00000427805.2	chrX	100645812	100651105	+	0.946372
ENST00000513820.1	chr5	118462477	118464139	-	ENSG00000122545.12	ENST00000399034.2	chr7	35840627	35944915	+	0.877262
ENST00000392730.2	chr17	17286691	17287326	-	ENSG00000167526.8	ENST00000393099.3	chr16	89627119	89630950	+	0.984277
ENST00000519625.1	chr5	67455046	67455721	-	ENSG00000114942.9	ENST00000392222.2	chr2	207024329	207027652	+	0.95858
ENST00000429216.1	chr2	201927812	201928774	+	ENSG00000135486.10	ENST00000340913.5	chr12	54674488	54679028	+	0.971963
ENST00000421721.1	chr2	24123563	24124019	+	ENSG00000110700.2	ENST00000525634.1	chr11	17095936	17099334	-	0.840263
ENST00000505191.1	chr2	159718922	159719800	+	ENSG00000237521.1	ENST00000456448.1	chr19	9361606	9362820	+	0.843003
ENST00000499125.3	chr5	70833479	70833673	-	ENSG00000205581.6	ENST00000361263.4	chr21	40714242	40718454	-	0.830769
ENST00000469884.1	chr12	15592461	15593335	+	ENSG00000140988.8	ENST00000343262.3	chr16	2012062	2014861	-	0.888
ENST00000478252.1	chr3	93794756	93796019	-	ENSG00000162521.12	ENST00000373493.4	chr1	33116749	33146254	+	0.954114
ENST00000519198.1	chr8	102378643	102379250	-	ENSG00000204527.1	ENST00000376239.1	chr19	57663094	57678856	-	0.884868
ENST00000486095.1	chr1	21724480	21724855	+	ENSG00000204619.3	ENST00000376772.3	chr6	30034865	30038110	+	0.949468
ENST00000505179.1	chr5	79315432	79315743	+	ENSG00000100387.8	ENST00000216225.8	chr22	41347363	41369313	+	0.855769
ENST00000506570.1	chr5	162466297	162466605	+	ENSG00000173141.4	ENST00000309594.4	chr13	21750784	21753223	+	0.731392
ENST00000452221.1	chr1	171052706	171054346	+	ENSG00000137760.10	ENST00000389568.3	chr11	107375321	107436244	-	0.889701
ENST00000413308.1	chr19	54275760	54276534	-	ENSG00000122545.12	ENST00000425198.1	chr7	35872408	35944915	+	0.84129
ENST00000414817.1	chrX	74757380	74758537	-	ENSG00000081154.7	ENST00000265260.3	chr3	101292939	101313281	+	0.874759
ENST00000404250.1	chr6	88974877	88975230	+	ENSG00000164587.7	ENST00000407193.1	chr5	149823794	149829319	-	0.861582
ENST00000424262.1	chr2	9221524	9221856	-	ENSG00000156482.6	ENST00000521291.1	chr8	99053949	99057742	-	0.903904
ENST00000441775.1	chr1	84710017	84710260	+	ENSG00000129559.7	ENST00000250495.5	chr14	24686058	24701660	-	0.963115
ENST00000460239.1	chr17	76842032	76842950	-	ENSG00000163682.10	ENST00000449470.2	chr4	39455757	39460508	-	0.833046
ENST00000431854.1	chrX	94839302	94839946	+	ENSG00000155115.6	ENST00000329970.7	chr6	111279763	111289093	+	0.835659
ENST00000455109.1	chr10	110055857	110056251	+	ENSG00000110958.9	ENST00000414274.2	chr12	57057525	57082006	-	0.827848
ENST00000434525.1	chr2	193638808	193639142	+	ENSG00000184779.7	ENST00000330339.7	chr15	82821158	82824972	-	0.79403
ENST00000438601.1	chr1	28780031	28780444	+	ENSG00000126698.5	ENST00000263697.4	chr1	28527068	28559536	-	0.937198
ENST00000434403.1	chr13	95412807	95413269	-	ENSG00000122026.6	ENST00000311549.6	chr13	27825446	27830705	+	0.87257
ENST00000407768.1	chr6	38895807	38895929	+	ENSG00000140988.8	ENST00000533186.1	chr16	2012062	2014357	-	0.829268
ENST00000505463.1	chr4	17913297	17914599	+	ENSG00000111057.5	ENST00000388835.2	chr12	53342843	53346684	+	0.876404
ENST00000522168.1	chr8	85998850	85999421	+	ENSG00000164893.4	ENST00000297524.3	chr8	87226281	87242610	-	0.643357
ENST00000510511.1	chr4	74202950	74203404	-	ENSG00000104231.6	ENST00000521895.1	chr8	82614783	82633517	-	0.72967
ENST00000492033.1	chr3	114997972	114998707	+	ENSG00000135930.9	ENST00000409514.1	chr2	233415393	233448352	+	0.911685
ENST00000429409.1	chr7	65469004	65469124	+	ENSG00000196715.4	ENST00000360768.2	chr7	65338254	65424530	+	0.958678
ENST00000482859.1	chr4	113709239	113710034	-	ENSG00000148303.12	ENST00000323345.6	chr9	136215069	136218281	+	0.971106
ENST00000442243.1	chr2	112475085	112475414	+	ENSG00000176396.8	ENST00000539700.1	chr19	40029449	40030838	-	0.8
ENST00000456760.1	chr9	125448212	125450651	+	ENSG00000198586.8	ENST00000442919.2	chr2	171847333	172017410	-	0.907377
ENST00000418085.1	chr3	22945626	22946642	+	ENSG00000132341.5	ENST00000543796.1	chr12	131356424	131362223	+	0.829193
ENST00000381974.3	chr3	97200021	97200350	-	ENSG00000132958.12	ENST00000400230.2	chr13	19997023	20077419	-	0.945455
ENST00000468193.1	chr11	44650907	44651224	+	ENSG00000109475.12	ENST00000394668.2	chr4	109541812	109551568	+	0.811321
ENST00000400977.2	chr1	168418899	168420449	-	ENSG00000130348.7	ENST00000369046.4	chr6	107077453	107116292	+	0.915538
ENST00000439139.1	chr1	158165423	158165921	-	ENSG00000124614.9	ENST00000344700.3	chr6	34385231	34392998	-	0.911824
ENST00000434734.1	chr1	100163798	100164734	+	ENSG00000029993.10	ENST00000325307.7	chrX	150151759	150159248	+	0.902098
ENST00000447560.1	chr2	108893268	108894398	+	ENSG00000112290.8	ENST00000392589.1	chr6	110421022	110501207	-	0.816092
ENST00000405796.1	chr6	90011502	90012833	+	ENSG00000196230.7	ENST00000396389.1	chr6	30689444	30693203	+	0.780781
ENST00000494644.1	chr6	36704827	36705763	+	ENSG00000121853.3	ENST00000241256.2	chr3	172162923	172166246	-	0.568837
ENST00000392493.3	chr12	121282913	121283450	-	ENSG00000143761.8	ENST00000272102.5	chr1	228270361	228286910	+	0.899628
ENST00000531247.1	chr11	41819093	41819514	+	ENSG00000168795.4	ENST00000307750.4	chr9	37438111	37465396	-	0.71327
ENST00000417893.1	chr2	161905117	161907057	-	ENSG00000088205.7	ENST00000263239.2	chr2	118572226	118589955	+	0.833076
ENST00000445936.1	chr2	203926037	203927126	-	ENSG00000105708.7	ENST00000344099.2	chr19	19821282	19843921	-	0.776147
ENST00000510773.1	chr4	135865430	135865678	+	ENSG00000164405.5	ENST00000378670.3	chr5	132202252	132203723	+	0.875502
ENST00000509441.1	chr5	71713316	71714162	+	ENSG00000065978.12	ENST00000321358.7	chr1	43148098	43168020	+	0.821724
ENST00000412728.1	chr2	232450575	232451038	+	ENSG00000198242.7	ENST00000422514.2	chr17	27046411	27051377	+	0.890086
ENST00000405921.1	chr6	10365857	10366815	-	ENSG00000147604.9	ENST00000396467.1	chr8	74202519	74205868	-	0.694099
ENST00000462726.1	chr19	58464526	58465127	-	ENSG00000108298.4	ENST00000225430.4	chr17	37356536	37360980	+	0.842193
ENST00000416294.1	chr10	78596326	78596619	+	ENSG00000159199.7	ENST00000393366.2	chr17	46970179	46973231	+	0.897959
ENST00000404435.1	chr22	17338509	17341608	-	ENSG00000074657.8	ENST00000336078.4	chr18	56529832	56653712	+	0.934516
ENST00000458108.1	chr3	32300432	32301722	+	ENSG00000111057.5	ENST00000388835.2	chr12	53342843	53346684	+	0.917893
ENST00000438548.1	chr6	133318788	133319189	-	ENSG00000198242.7	ENST00000422514.2	chr17	27046411	27051377	+	0.905473
ENST00000446875.1	chr6	30154575	30156391	-	ENSG00000172239.9	ENST00000514514.1	chr5	43527215	43557179	-	0.822111
ENST00000442894.1	chr9	66342527	66343121	-	ENSG00000151233.5	ENST00000280876.5	chr12	42475650	42538673	-	0.904202
ENST00000408001.1	chr6	34711953	34712450	+	ENSG00000124614.9	ENST00000344700.3	chr6	34385231	34392998	-	0.96988
ENST00000420179.1	chr7	121799354	121802297	+	ENSG00000163728.6	ENST00000412756.2	chr3	180319981	180328762	+	0.845739
ENST00000532005.1	chr11	89231916	89232366	-	ENSG00000168148.3	ENST00000366696.1	chr1	228612546	228613026	-	0.554324
ENST00000418544.1	chr21	17493630	17493964	-	ENSG00000197728.4	ENST00000356464.4	chr12	56435686	56438005	+	0.81791
ENST00000406773.1	chr6	100978152	100978928	+	ENSG00000043093.8	ENST00000292782.4	chr3	182655862	182698431	-	0.960103
ENST00000416278.1	chr10	73949699	73950334	+	ENSG00000174748.11	ENST00000307839.4	chr3	23958036	23962338	+	0.900943
ENST00000417455.1	chr10	44100291	44101699	-	ENSG00000131236.10	ENST00000430361.2	chr1	40506402	40537617	+	0.840312
ENST00000522128.1	chr8	99916831	99917899	-	ENSG00000173914.5	ENST00000525754.1	chr11	66432469	66445219	-	0.913938
ENST00000407190.1	chr16	1527829	1528584	+	ENSG00000145425.5	ENST00000274065.4	chr4	152020725	152025804	+	0.798942
ENST00000416050.1	chr2	157634218	157634884	-	ENSG00000089157.10	ENST00000228306.4	chr12	120634510	120639014	-	0.841079
ENST00000529649.1	chr11	67703029	67703386	+	ENSG00000138326.12	ENST00000440692.1	chr10	79793518	79816570	+	0.821229
ENST00000399739.2	chr10	34964563	34964969	-	ENSG00000112306.7	ENST00000230050.3	chr6	133135580	133138703	+	0.842752
ENST00000543528.1	chr12	19566087	19566395	+	ENSG00000105185.5	ENST00000221784.3	chr19	33072104	33078322	+	0.97411
ENST00000419980.1	chr7	36345240	36345513	+	ENSG00000198918.6	ENST00000361575.3	chrX	118920469	118925606	-	0.882353
ENST00000488662.1	chr16	78859178	78859903	+	ENSG00000149273.8	ENST00000531188.1	chr11	75110530	75117957	+	0.885675
ENST00000388829.3	chrX	13396854	13397459	-	ENSG00000233276.2	ENST00000419783.1	chr3	49394609	49396033	-	0.981848
ENST00000526681.1	chr8	13766740	13767289	-	ENSG00000125870.6	ENST00000246071.6	chr20	16710629	16722421	+	0.712727
ENST00000488019.1	chr7	104941969	104942533	+	ENSG00000182552.10	ENST00000326397.5	chr4	184560788	184580378	-	0.984071
ENST00000417617.1	chr7	25251789	25252584	-	ENSG00000148303.12	ENST00000323345.6	chr9	136215069	136218281	+	0.895729
ENST00000402340.2	chrX	37400330	37404515	-	ENSG00000189132.5	ENST00000329357.5	chrX	34960913	34963034	+	0.516413
ENST00000517817.1	chr5	178336711	178337610	-	ENSG00000188215.3	ENST00000324344.3	chr16	20869396	20911706	-	0.93
ENST00000432033.1	chr10	33233409	33233927	+	ENSG00000147853.10	ENST00000381809.3	chr9	4711155	4741318	-	0.913295
ENST00000474557.1	chr3	136327892	136328444	+	ENSG00000205581.6	ENST00000380749.5	chr21	40714241	40721126	-	0.705244
ENST00000442891.1	chrX	52555981	52556851	+	ENSG00000086589.7	ENST00000199814.4	chr5	150070356	150080669	-	0.819747
ENST00000515048.1	chr4	16362462	16363452	-	ENSG00000169554.8	ENST00000392860.3	chr2	145121063	145277958	-	0.649849
ENST00000413490.1	chr13	23377435	23377787	+	ENSG00000148303.12	ENST00000323345.6	chr9	136215069	136218281	+	0.937677
ENST00000414760.1	chrX	89544539	89544902	-	ENSG00000244687.3	ENST00000340309.3	chr20	48697661	48732491	-	0.936813
ENST00000405336.1	chr6	55545440	55545819	-	ENSG00000136003.10	ENST00000431221.2	chr12	108956377	108962868	+	0.834211
ENST00000405809.1	chr6	127976005	127976307	-	ENSG00000177565.10	ENST00000430069.1	chr3	176737143	176914266	-	0.957096
ENST00000421208.1	chr7	77987609	77988189	+	ENSG00000142541.10	ENST00000391857.4	chr19	49990811	49995565	+	0.827883
ENST00000427818.1	chr2	242417731	242418408	+	ENSG00000167977.3	ENST00000301738.3	chr16	2732498	2759031	+	0.851032
ENST00000486743.1	chr7	143682235	143683744	+	ENSG00000155380.7	ENST00000538576.1	chr1	113454474	113498685	-	0.817219
ENST00000508710.1	chr4	188667248	188669353	-	ENSG00000134007.2	ENST00000256389.2	chr14	70989078	71001732	-	0.68566
ENST00000533569.1	chr8	43169091	43169343	+	ENSG00000154898.10	ENST00000425519.1	chr17	20224487	20305504	+	0.853755
ENST00000447284.1	chr1	160817801	160818287	+	ENSG00000196262.8	ENST00000468812.1	chr7	44836279	44842716	+	0.864476
ENST00000421800.1	chr13	29172970	29174189	+	ENSG00000161960.9	ENST00000293831.7	chr17	7476024	7482324	+	0.934426
ENST00000532878.1	chr11	74790310	74791176	-	ENSG00000181163.9	ENST00000296930.5	chr5	170814652	170838141	+	0.935409
ENST00000450173.1	chr19	54891093	54891564	+	ENSG00000185608.4	ENST00000333130.3	chr22	19419425	19423598	+	0.684322
ENST00000449688.1	chr1	168511975	168512592	+	ENSG00000148303.12	ENST00000323345.6	chr9	136215069	136218281	+	0.865696
ENST00000457012.1	chr1	247277161	247283578	+	ENSG00000068078.12	ENST00000340107.4	chr4	1795039	1810599	+	0.756906
ENST00000517841.1	chr8	20791946	20792348	-	ENSG00000109084.8	ENST00000226230.5	chr17	26646161	26655711	+	0.918114
ENST00000507976.2	chr8	144138477	144139233	-	ENSG00000147853.10	ENST00000381809.3	chr9	4711155	4741318	-	0.941725
ENST00000456608.1	chr13	20137729	20139040	-	ENSG00000166734.11	ENST00000299957.6	chr15	44580929	44707956	+	0.945122
ENST00000403105.1	chr6	70415179	70416052	-	ENSG00000181163.9	ENST00000296930.5	chr5	170814652	170838141	+	0.938215
ENST00000520730.1	chr8	77925987	77926264	-	ENSG00000181061.9	ENST00000321331.7	chr3	42825790	42846023	-	0.892086
ENST00000447235.1	chr9	21811620	21812346	-	ENSG00000137285.7	ENST00000259818.6	chr6	3224517	3227969	-	0.792297
ENST00000438508.1	chr2	207124352	207124642	-	ENSG00000205581.6	ENST00000361263.4	chr21	40714242	40718454	-	0.773196
ENST00000430516.1	chr1	163392195	163392954	-	ENSG00000104131.7	ENST00000261868.5	chr15	44829255	44855001	+	0.769578
ENST00000538078.1	chr12	7591376	7592586	-	ENSG00000196199.7	ENST00000414242.2	chr13	20207788	20245126	+	0.974401
ENST00000434597.1	chr9	37477352	37478309	+	ENSG00000104756.10	ENST00000221200.4	chr8	25285366	25315983	-	0.964509
ENST00000403835.1	chr6	100498259	100499141	-	ENSG00000181163.9	ENST00000296930.5	chr5	170814652	170838141	+	0.893545
ENST00000508046.1	chr5	68609198	68609699	-	ENSG00000172757.7	ENST00000525451.1	chr11	65622272	65626886	-	0.922311
ENST00000434894.1	chr2	110494716	110495100	-	ENSG00000116251.5	ENST00000234875.4	chr1	6245080	6259672	-	0.932468
ENST00000481111.1	chr2	106905259	106905509	-	ENSG00000171858.11	ENST00000370562.1	chr20	60962353	60963576	+	0.848606
ENST00000418638.1	chrX	114298499	114299357	-	ENSG00000189180.9	ENST00000374618.3	chr10	38299578	38348991	+	0.759022
ENST00000509930.1	chr5	77603327	77603738	+	ENSG00000184752.7	ENST00000327772.1	chr12	95365109	95397511	-	0.75
ENST00000514583.1	chr4	132461436	132461637	+	ENSG00000151779.8	ENST00000441755.1	chr2	15514732	15564516	-	0.747525
ENST00000436794.1	chrX	24531567	24531804	+	ENSG00000182004.8	ENST00000414487.2	chr1	203830743	203839678	+	0.865546
ENST00000517577.1	chr8	82433921	82434467	-	ENSG00000167996.10	ENST00000273550.7	chr11	61731757	61735132	-	0.97075
ENST00000455173.1	chr3	185324363	185324661	+	ENSG00000109475.12	ENST00000394668.2	chr4	109541812	109551568	+	0.859532
ENST00000527162.1	chr11	7999028	7999255	+	ENSG00000164919.4	ENST00000297564.2	chr8	100890376	100905912	-	0.719298
ENST00000400348.2	chr9	27608385	27610743	-	ENSG00000150527.10	ENST00000341502.5	chr14	39736328	39856156	+	0.894023
ENST00000454984.1	chrX	134269077	134269698	-	ENSG00000173275.8	ENST00000339249.4	chrX	134478721	134497077	+	0.741158
ENST00000441868.1	chr6	135219012	135219889	+	ENSG00000162959.8	ENST00000295065.4	chr2	32092878	32235626	-	0.95672
ENST00000502728.1	chr5	62597350	62597883	+	ENSG00000088387.12	ENST00000376460.1	chr13	99445741	99630244	-	0.953333
ENST00000447199.1	chr10	31649884	31650144	+	ENSG00000090054.8	ENST00000337841.4	chr9	94841343	94877665	-	0.988506
ENST00000491689.1	chr3	182409716	182410073	+	ENSG00000069764.3	ENST00000438167.2	chr16	14766402	14788526	-	0.863128
ENST00000513087.1	chr5	38429994	38430262	-	ENSG00000131469.7	ENST00000253788.4	chr17	41150446	41154956	+	0.892193
ENST00000476442.1	chr1	144612266	144612683	-	ENSG00000108518.6	ENST00000225655.5	chr17	4848947	4852309	-	0.875598
ENST00000438600.1	chr9	3364329	3364792	-	ENSG00000147604.9	ENST00000396467.1	chr8	74202519	74205868	-	0.767241
ENST00000524200.1	chr8	57165519	57165931	-	ENSG00000176422.9	ENST00000338146.5	chr12	56862301	56864763	+	0.808511
ENST00000411913.1	chr20	34663940	34664523	-	ENSG00000029993.10	ENST00000419110.1	chrX	150148982	150156350	+	0.893836
ENST00000441999.1	chr6	109609643	109609765	+	ENSG00000099246.9	ENST00000356940.5	chr10	27793197	27829092	+	0.926829
ENST00000435341.1	chrX	116097017	116097644	+	ENSG00000119335.11	ENST00000322030.8	chr9	131451505	131458667	+	0.931529
ENST00000519039.1	chr8	102381138	102381778	+	ENSG00000253506.1	ENST00000521764.1	chr17	59667794	59668563	-	0.914197
ENST00000513113.1	chr4	111866268	111866955	-	ENSG00000120992.11	ENST00000316963.3	chr8	54958938	55014577	-	0.936047
ENST00000419672.1	chr6	7341087	7342289	-	ENSG00000205126.2	ENST00000378832.1	chr11	44069531	44081527	+	0.916043
ENST00000421214.1	chr1	168338292	168338839	+	ENSG00000166847.4	ENST00000300087.2	chr16	23652713	23681195	+	0.921533
ENST00000406666.1	chr6	121799845	121800981	-	ENSG00000108064.6	ENST00000487519.1	chr10	60144782	60158981	+	0.77957
ENST00000443279.1	chrX	153850679	153851751	-	ENSG00000128272.10	ENST00000337304.2	chr22	39916569	39918688	+	0.89562
ENST00000456674.1	chr2	11448151	11449067	+	ENSG00000186063.8	ENST00000340020.6	chr1	222841355	222885866	-	0.97928
ENST00000420181.1	chr7	83054196	83054318	+	ENSG00000100804.13	ENST00000334454.9	chr14	23495060	23504354	-	0.902439
ENST00000510247.1	chr3	140338536	140338679	-	ENSG00000134545.9	ENST00000544822.1	chr12	10598642	10607215	-	0.888889
ENST00000421815.1	chr7	56569977	56570737	-	ENSG00000169251.6	ENST00000460469.1	chr3	160939347	160969792	+	0.944809
ENST00000511220.1	chr5	92603135	92604131	+	ENSG00000106628.6	ENST00000406581.2	chr7	44154286	44163107	-	0.919759
ENST00000510266.1	chr5	17511942	17512347	-	ENSG00000132475.3	ENST00000254810.3	chr17	73772517	73775860	-	0.669951
ENST00000420976.1	chr10	114747235	114747624	+	ENSG00000115268.3	ENST00000233609.3	chr19	1438363	1440492	+	0.561538
ENST00000504812.1	chr5	60039390	60040797	-	ENSG00000170421.5	ENST00000293308.5	chr12	53290971	53298868	-	0.921165
ENST00000515267.1	chr4	23516578	23516907	-	ENSG00000223638.3	ENST00000434937.2	chr19	56270380	56274541	+	0.842424
ENST00000518404.1	chr8	63394757	63396370	-	ENSG00000185651.10	ENST00000342192.4	chr22	21921836	21978323	+	0.780669
ENST00000445313.1	chrY	26837938	26839079	+	ENSG00000176979.8	ENST00000341062.5	chr4	165960350	165962665	+	0.817728
ENST00000342688.4	chr4	151642133	151642630	+	ENSG00000176261.10	ENST00000468695.1	chr1	33086421	33116185	-	0.917671
ENST00000503840.1	chr4	78232522	78233363	-	ENSG00000163530.4	ENST00000478945.1	chr3	109012635	109035364	-	0.703088
ENST00000426192.1	chr7	62806218	62807110	+	ENSG00000228567.2	ENST00000311170.4	chr19	53769929	53770972	-	0.582307
ENST00000419731.1	chr1	182151865	182152231	-	ENSG00000119801.8	ENST00000261353.4	chr2	30369827	30383399	+	0.861035
ENST00000493920.1	chr7	105170656	105171118	+	ENSG00000168894.5	ENST00000441634.1	chr2	85822848	85824704	+	0.941685
ENST00000441743.1	chr22	21622450	21623192	+	ENSG00000169016.12	ENST00000381525.3	chr2	11584501	11606275	-	0.990579
ENST00000448560.1	chrX	144258102	144258414	+	ENSG00000172115.4	ENST00000305786.2	chr7	25159710	25164980	-	0.881789
ENST00000424919.1	chrX	150161974	150162564	+	ENSG00000108298.4	ENST00000225430.4	chr17	37356536	37360980	+	0.94247
ENST00000511702.1	chr4	111320932	111321667	-	ENSG00000146223.9	ENST00000304734.5	chr6	42847420	42857663	+	0.930707
ENST00000402154.1	chr6	65443092	65443730	-	ENSG00000006042.5	ENST00000261713.3	chr17	31254955	31268667	+	0.840376
ENST00000475149.1	chr14	31260304	31260695	+	ENSG00000197958.8	ENST00000361436.5	chr9	130209953	130213684	-	0.864796
ENST00000461396.1	chr5	61857686	61858043	-	ENSG00000071082.5	ENST00000409711.1	chr2	101619153	101622829	+	0.793296
ENST00000341855.4	chr7	56665072	56666035	+	ENSG00000136231.8	ENST00000258729.3	chr7	23349828	23510086	-	0.948133
ENST00000465006.1	chr3	98338909	98339462	+	ENSG00000108298.4	ENST00000225430.4	chr17	37356536	37360980	+	0.776173
ENST00000518851.1	chr8	115330633	115331140	-	ENSG00000003509.11	ENST00000002125.4	chr2	37458809	37476303	+	0.90748
ENST00000513136.1	chr4	117016260	117018229	-	ENSG00000117000.6	ENST00000372771.4	chr1	40627045	40706593	+	0.82132
ENST00000515236.1	chr5	55571131	55572457	-	ENSG00000100764.8	ENST00000261303.7	chr14	90722894	90738966	+	0.930671
ENST00000412004.1	chrX	123460025	123460108	-	ENSG00000137818.6	ENST00000260379.5	chr15	69745123	69748172	+	0.97619
ENST00000417358.1	chr13	23489790	23490662	+	ENSG00000153989.7	ENST00000368494.3	chr6	117996665	118031803	+	0.945017
ENST00000455621.1	chr1	178380751	178381107	+	ENSG00000164587.7	ENST00000401695.3	chr5	149822753	149829310	-	0.938375
ENST00000469219.1	chr14	93689944	93690485	-	ENSG00000105640.6	ENST00000222247.4	chr19	17970731	17974124	+	0.913284
ENST00000514799.1	chr5	59755675	59756566	-	ENSG00000119335.11	ENST00000372692.4	chr9	131445934	131458679	+	0.913677
ENST00000419844.1	chr3	12369502	12369773	+	ENSG00000113068.5	ENST00000261813.4	chr5	139624624	139682706	-	0.970588
ENST00000509651.1	chr4	172090360	172091093	-	ENSG00000053501.7	ENST00000263897.4	chr19	17326155	17330638	+	0.765668
ENST00000455244.1	chr17	20687958	20689040	+	ENSG00000099194.4	ENST00000370355.2	chr10	102106881	102124591	+	0.966759
ENST00000478867.1	chr3	113604145	113604878	+	ENSG00000175826.6	ENST00000318988.5	chr17	7146910	7155280	-	0.968665
ENST00000418670.1	chr20	14108046	14108982	+	ENSG00000164022.11	ENST00000442366.1	chr4	107236767	107270377	+	0.901814
ENST00000488906.1	chr17	45236557	45237359	-	ENSG00000140988.8	ENST00000343262.3	chr16	2012062	2014861	-	0.910336
ENST00000441690.1	chr7	26315815	26316226	+	ENSG00000125691.7	ENST00000479035.1	chr17	37004118	37010064	-	0.907767
ENST00000467217.1	chr17	60397245	60397550	+	ENSG00000241343.2	ENST00000427805.2	chrX	100645812	100651105	+	0.872549
ENST00000439197.1	chr2	61816633	61816798	-	ENSG00000213741.3	ENST00000396020.3	chr14	50043390	50053094	-	0.885542
ENST00000524828.1	chr11	85994969	85995710	+	ENSG00000117154.6	ENST00000251296.1	chr1	18434240	18704976	+	0.681941
ENST00000530817.1	chr8	11882753	11883107	-	ENSG00000149823.3	ENST00000279281.3	chr11	64863631	64879332	+	0.912676
ENST00000477964.1	chr5	177482605	177483195	+	ENSG00000108298.4	ENST00000225430.4	chr17	37356536	37360980	+	0.972927
ENST00000496846.1	chr7	30411124	30412357	+	ENSG00000087191.7	ENST00000310144.5	chr17	61904810	61909386	+	0.824959
ENST00000527837.1	chr11	64913162	64913443	-	ENSG00000181061.9	ENST00000321331.7	chr3	42825790	42846023	-	0.925532
ENST00000435496.1	chrX	114899215	114900453	+	ENSG00000130707.11	ENST00000334909.3	chr9	133320094	133376660	+	0.920097
ENST00000448052.1	chr1	84551424	84551916	+	ENSG00000100348.5	ENST00000216185.2	chr22	36863083	36878077	-	0.922921
ENST00000441047.1	chr17	51834350	51835231	-	ENSG00000140988.8	ENST00000343262.3	chr16	2012062	2014861	-	0.938776
ENST00000473094.1	chr18	57428790	57429137	+	ENSG00000197728.4	ENST00000356464.4	chr12	56435686	56438005	+	0.931034
ENST00000422915.1	chr22	27282872	27283511	-	ENSG00000174748.11	ENST00000307839.4	chr3	23958036	23962338	+	0.955017
ENST00000454916.1	chr7	4905063	4905435	-	ENSG00000116251.5	ENST00000234875.4	chr1	6245080	6259672	-	0.949062
ENST00000421856.1	chrX	63917758	63918427	-	ENSG00000164284.10	ENST00000329271.3	chr5	148724993	148734146	+	0.91194
ENST00000438175.1	chr9	52410	52680	-	ENSG00000154330.6	ENST00000377314.1	chr9	70971815	71145977	+	0.859779
ENST00000497954.1	chr17	41231319	41231797	+	ENSG00000122026.6	ENST00000311549.6	chr13	27825446	27830705	+	0.960334
ENST00000447818.2	chrX	79827370	79830106	-	ENSG00000159399.4	ENST00000290573.2	chr2	75061108	75120486	+	0.966387
ENST00000422172.1	chr7	63398283	63398887	-	ENSG00000078061.7	ENST00000377045.4	chrX	47420516	47431299	+	0.806612
ENST00000419538.1	chrY	27632787	27633469	+	ENSG00000106976.12	ENST00000341179.7	chr9	130965658	131017516	+	0.820046
ENST00000411545.2	chr22	21022124	21025272	-	ENSG00000129968.9	ENST00000292577.5	chr19	1876976	1885518	-	0.962596
ENST00000427885.1	chr3	47705116	47705424	+	ENSG00000146066.2	ENST00000274787.2	chr5	175815748	175816772	+	0.951456
ENST00000504093.1	chr5	7288037	7288590	-	ENSG00000103121.3	ENST00000219400.3	chr16	81009699	81040719	-	0.845528
ENST00000529267.1	chr14	70712472	70714377	-	ENSG00000139985.4	ENST00000267499.3	chr14	70924217	70926622	+	0.974292
ENST00000421072.1	chr3	17374618	17374923	+	ENSG00000176731.7	ENST00000417663.2	chr8	86126311	86132603	-	0.833333
ENST00000506124.1	chr4	136486272	136488312	-	ENSG00000143374.8	ENST00000369053.3	chr1	150459907	150461784	+	0.242528
ENST00000426289.1	chr1	46570628	46570847	+	ENSG00000131174.4	ENST00000481445.1	chrX	77154935	77162870	+	0.9
ENST00000414680.1	chr6	137295067	137295354	-	ENSG00000182899.10	ENST00000464167.1	chr3	197676858	197683481	+	0.888889
ENST00000439130.1	chr9	136205827	136206302	+	ENSG00000122026.6	ENST00000311549.6	chr13	27825446	27830705	+	0.930672
ENST00000465434.1	chr12	120960467	120961246	-	ENSG00000162244.5	ENST00000466397.1	chr3	52027644	52029879	-	0.92053
ENST00000526107.1	chr11	101079636	101080181	+	ENSG00000150712.6	ENST00000280285.5	chr5	32227100	32313044	-	0.934066
ENST00000448440.1	chr10	38989555	38991033	+	ENSG00000115091.4	ENST00000263238.2	chr2	114647537	114720173	+	0.710615
ENST00000429528.1	chr13	87377755	87378308	+	ENSG00000091164.7	ENST00000217515.5	chr18	54264439	54305920	-	0.712996
ENST00000449593.1	chr3	24472239	24472598	+	ENSG00000071082.5	ENST00000409711.1	chr2	101619153	101622829	+	0.836111
ENST00000448913.1	chr13	60848910	60850140	+	ENSG00000120948.10	ENST00000240185.3	chr1	11072699	11084100	+	0.939074
ENST00000529959.1	chr11	18128130	18128388	+	ENSG00000181061.9	ENST00000452906.2	chr3	42826744	42845925	-	0.872587
ENST00000429708.1	chrX	119344309	119346528	-	ENSG00000156508.12	ENST00000316292.9	chr6	74225473	74230741	-	0.872659
ENST00000503355.1	chr4	185832043	185832506	-	ENSG00000138741.6	ENST00000264811.5	chr4	122800182	122854612	-	0.743534
ENST00000474922.1	chrX	84189546	84189827	+	ENSG00000131508.11	ENST00000253815.2	chr5	138940751	139008016	+	0.737589
ENST00000406848.1	chr6	70455763	70456743	+	ENSG00000111640.8	ENST00000229239.5	chr12	6643093	6647537	+	0.827727
ENST00000401540.2	chr2	130750462	130751613	+	ENSG00000157216.10	ENST00000371320.3	chr1	54692305	54872092	-	0.957465
ENST00000456671.1	chr2	174296077	174296540	-	ENSG00000189159.9	ENST00000405458.3	chr17	73131343	73150774	-	0.890086
ENST00000487872.1	chr18	21289784	21290251	-	ENSG00000198242.7	ENST00000422514.2	chr17	27046411	27051377	+	0.940171
ENST00000426313.1	chr10	79193330	79193540	-	ENSG00000164919.4	ENST00000522940.1	chr8	100890379	100905851	-	0.800948
ENST00000404529.2	chrX	57095347	57096118	-	ENSG00000186787.7	ENST00000275988.5	chrX	57146115	57147924	-	0.843264
ENST00000431782.1	chr1	16119291	16119780	+	ENSG00000197958.8	ENST00000361436.5	chr9	130209953	130213684	-	0.94898
ENST00000456611.1	chr20	25650493	25651022	-	ENSG00000118579.6	ENST00000237380.6	chr4	17616254	17627254	+	0.841509
ENST00000470691.1	chr7	143452341	143454751	-	ENSG00000150527.10	ENST00000280083.3	chr14	39736350	39820599	+	0.914558
ENST00000422644.1	chrX	73692850	73693788	-	ENSG00000135486.10	ENST00000330752.6	chr12	54674488	54679028	+	0.915868
ENST00000435535.1	chr9	6662424	6663792	+	ENSG00000145425.5	ENST00000514682.1	chr4	152020781	152025789	+	0.865123
ENST00000484311.1	chr19	52124389	52124954	+	ENSG00000163682.10	ENST00000449470.2	chr4	39455757	39460508	-	0.729682
ENST00000438540.1	chr9	95655950	95656787	-	ENSG00000178996.8	ENST00000326277.3	chr5	53813593	53816833	+	0.745823
ENST00000480094.2	chr4	87791344	87792187	+	ENSG00000089009.8	ENST00000424576.1	chr12	112842997	112847443	-	0.913507
ENST00000511389.1	chr5	43225608	43225915	-	ENSG00000184752.7	ENST00000327772.1	chr12	95365109	95397511	-	0.863636
ENST00000321498.5	chr7	112086219	112086430	-	ENSG00000143947.8	ENST00000272317.6	chr2	55459538	55462989	+	0.886792
ENST00000427532.1	chr9	10829752	10830308	-	ENSG00000177971.5	ENST00000314852.2	chr15	75931426	75941047	-	0.791741
ENST00000494933.1	chr15	78953389	78953918	-	ENSG00000063177.6	ENST00000084795.4	chr19	49118591	49122433	-	0.886792
ENST00000531780.1	chr11	4351095	4351676	+	ENSG00000160075.9	ENST00000291386.3	chr1	1477053	1510249	-	0.754296
ENST00000435914.1	chrX	130937340	130937769	-	ENSG00000127838.9	ENST00000248451.3	chr2	219135115	219137670	+	0.918605
ENST00000495689.1	chr3	161046712	161048026	-	ENSG00000100764.8	ENST00000261303.7	chr14	90722894	90738966	+	0.909506
ENST00000429208.1	chr1	209405541	209406764	+	ENSG00000198176.7	ENST00000375370.4	chr13	114239056	114295504	+	0.918301
ENST00000466377.1	chr4	66439177	66440046	+	ENSG00000089009.8	ENST00000424576.1	chr12	112842997	112847443	-	0.981609
ENST00000489257.1	chr1	237167487	237167672	-	ENSG00000205360.4	ENST00000379816.4	chr16	56682743	56683426	+	0.704301
ENST00000482895.2	chr8	59500979	59501323	-	ENSG00000197728.4	ENST00000356464.4	chr12	56435686	56438005	+	0.982609
ENST00000462291.1	chr3	120524713	120525592	+	ENSG00000187109.7	ENST00000261182.7	chr12	76438682	76478738	-	0.9375
ENST00000468453.1	chr5	180492086	180492677	+	ENSG00000167526.8	ENST00000393099.3	chr16	89627119	89630950	+	0.780405
ENST00000435399.1	chr1	45880692	45881016	+	ENSG00000196262.8	ENST00000468812.1	chr7	44836279	44842716	+	0.923077
ENST00000520812.1	chr8	59416147	59416627	+	ENSG00000196262.8	ENST00000489459.1	chr7	44836280	44841229	+	0.891892
ENST00000490852.1	chr3	149182626	149182988	-	ENSG00000119965.8	ENST00000481909.1	chr10	124691024	124713919	-	0.876033
ENST00000477729.1	chr15	60696662	60697159	+	ENSG00000124614.9	ENST00000344700.3	chr6	34385231	34392998	-	0.943775
ENST00000512162.1	chr5	105878767	105880031	-	ENSG00000197123.4	ENST00000449292.2	chr7	63490920	63727300	+	0.736759
ENST00000472088.1	chr8	81213104	81213716	+	ENSG00000083845.3	ENST00000196551.3	chr19	58898636	58906170	+	0.91354
ENST00000446931.1	chrX	101870406	101870748	-	ENSG00000168148.3	ENST00000366696.1	chr1	228612546	228613026	-	0.760933
ENST00000528351.1	chr11	85645780	85646706	+	ENSG00000100075.5	ENST00000215882.5	chr22	19163095	19166343	-	0.907228
ENST00000402595.1	chr6	118910233	118910797	+	ENSG00000187754.8	ENST00000298181.5	chrX	52673140	52683950	-	0.835398
ENST00000429280.1	chr9	41630397	41630883	+	ENSG00000113558.12	ENST00000519321.1	chr5	133494175	133512641	-	0.761807
ENST00000522428.1	chr5	159685260	159685592	+	ENSG00000156467.5	ENST00000287022.5	chr8	97238148	97247862	-	0.93994
ENST00000445875.1	chr2	207100960	207101595	-	ENSG00000241837.2	ENST00000290299.2	chr21	35275757	35288284	-	0.924528
ENST00000512800.1	chr4	189308625	189310820	-	ENSG00000128915.6	ENST00000261520.4	chr15	60711808	60771344	-	0.931314
ENST00000522680.1	chr8	39855388	39856018	-	ENSG00000120837.2	ENST00000240055.2	chr12	104510858	104532040	-	0.792393
ENST00000437312.1	chrX	48056657	48058867	+	ENSG00000065154.7	ENST00000368845.5	chr10	126085876	126107505	-	0.915468
ENST00000401911.1	chr6	149625243	149625564	-	ENSG00000197416.4	ENST00000360464.4	chr8	82437216	82443613	-	0.810559
ENST00000415977.1	chr2	135077225	135077649	-	ENSG00000181552.3	ENST00000326783.3	chr14	21236586	21239107	+	0.821176
ENST00000456719.1	chr2	61937211	61938113	-	ENSG00000188846.8	ENST00000396203.2	chr3	40498831	40503859	+	0.855501
ENST00000436766.1	chr2	133246129	133246661	-	ENSG00000065978.12	ENST00000436427.1	chr1	43148658	43168020	+	0.804878
ENST00000425922.1	chr1	79986765	79987888	+	ENSG00000197894.6	ENST00000296412.8	chr4	99992132	100009902	-	0.927936
ENST00000413972.2	chr10	60848461	60848799	-	ENSG00000137818.6	ENST00000260379.5	chr15	69745123	69748172	+	0.820059
ENST00000420177.1	chr13	46010256	46010795	+	ENSG00000196262.8	ENST00000468812.1	chr7	44836279	44842716	+	0.875926
ENST00000481866.2	chr3	138496674	138497652	+	ENSG00000111640.8	ENST00000229239.5	chr12	6643093	6647537	+	0.830439
ENST00000429048.1	chrX	101166533	101167441	+	ENSG00000176293.13	ENST00000313434.5	chr19	58570612	58580776	+	0.955996
ENST00000452887.1	chr1	245446160	245446391	-	ENSG00000205981.2	ENST00000382564.2	chr3	180701497	180707561	-	0.896552
ENST00000505417.1	chr4	9585566	9585755	-	ENSG00000124562.5	ENST00000374017.3	chr6	34725331	34741571	+	0.926316
ENST00000423257.1	chr17	17359741	17360573	+	ENSG00000198860.7	ENST00000361641.1	chr1	184020811	184043346	+	0.926214
ENST00000463344.1	chrX	6907370	6907824	+	ENSG00000143947.8	ENST00000272317.6	chr2	55459538	55462989	+	0.865934
ENST00000422363.1	chr7	25305543	25305909	-	ENSG00000198860.7	ENST00000533373.1	chr1	184020860	184042157	+	0.828338
ENST00000421426.1	chr10	47133338	47133898	-	ENSG00000135486.10	ENST00000330752.6	chr12	54674488	54679028	+	0.959002
ENST00000519737.1	chr8	29885229	29886416	+	ENSG00000169032.3	ENST00000307102.3	chr15	66679155	66783882	+	0.949495
ENST00000439836.1	chr3	94655930	94656868	-	ENSG00000164091.7	ENST00000296490.3	chr3	52288437	52312659	-	0.951012
ENST00000433250.1	chr9	32566151	32567124	-	ENSG00000169598.10	ENST00000378206.1	chr1	3774081	3801993	+	0.899384
ENST00000439981.1	chr20	18070760	18071359	-	ENSG00000174748.11	ENST00000307839.4	chr3	23958036	23962338	+	0.898333
ENST00000451232.1	chr10	118783185	118783362	-	ENSG00000215301.4	ENST00000399959.2	chrX	41192651	41209462	+	0.960674
ENST00000513307.1	chr4	87870821	87871265	-	ENSG00000099797.6	ENST00000436007.2	chr19	14640407	14676789	+	0.995506
ENST00000439324.1	chr1	12140308	12140605	-	ENSG00000198242.7	ENST00000422514.2	chr17	27046411	27051377	+	0.922819
ENST00000412501.1	chr9	107484616	107485546	+	ENSG00000179055.5	ENST00000318763.5	chr9	107456660	107457766	+	0.928668
ENST00000459725.1	chr12	13028433	13029041	+	ENSG00000142541.10	ENST00000391857.4	chr19	49990811	49995565	+	0.967159
ENST00000439038.1	chr3	31223243	31224142	-	ENSG00000064666.6	ENST00000263097.1	chr19	1026298	1039060	+	0.914444
ENST00000436981.1	chr1	149664577	149664889	+	ENSG00000100138.9	ENST00000401959.1	chr22	42069971	42084885	-	0.85623
ENST00000415043.1	chr1	244761693	244761989	-	ENSG00000172115.4	ENST00000305786.2	chr7	25159710	25164980	-	0.841751
ENST00000449858.2	chrY	23023223	23024223	+	ENSG00000111640.8	ENST00000229239.5	chr12	6643093	6647537	+	0.73027
ENST00000458741.1	chrX	24650374	24650674	+	ENSG00000196226.2	ENST00000357905.2	chr6	26043455	26043885	-	0.79402
ENST00000468701.1	chr12	3578116	3578462	+	ENSG00000197728.4	ENST00000356464.4	chr12	56435686	56438005	+	0.887608
ENST00000454107.1	chr10	69553528	69554003	+	ENSG00000122026.6	ENST00000311549.6	chr13	27825446	27830705	+	0.922269
ENST00000531560.1	chr8	61054380	61054701	+	ENSG00000151229.7	ENST00000280871.4	chr12	40148823	40499661	-	0.875776
ENST00000450202.1	chr1	228636869	228637322	-	ENSG00000198242.7	ENST00000394935.3	chr17	27047282	27050951	+	0.894273
ENST00000435871.1	chr1	92694575	92694992	-	ENSG00000075624.8	ENST00000331789.5	chr7	5566782	5570340	-	0.880383
ENST00000471002.1	chr12	31750051	31750343	-	ENSG00000071082.5	ENST00000264258.3	chr2	101618177	101623729	+	0.877133
ENST00000446084.1	chr1	151730135	151730918	+	ENSG00000142534.1	ENST00000270625.1	chr19	49999634	50002944	+	0.796537
ENST00000525121.1	chr11	20595732	20596496	+	ENSG00000164104.7	ENST00000296503.5	chr4	174252846	174256276	-	0.758621
ENST00000497904.1	chr20	52491791	52492096	-	ENSG00000116030.12	ENST00000392245.1	chr2	203070910	203103322	-	0.915033
ENST00000502802.1	chr2	231379738	231380353	+	ENSG00000189403.9	ENST00000405805.1	chr13	31032884	31191734	-	0.931818
ENST00000441060.1	chrX	48104329	48105178	+	ENSG00000065154.7	ENST00000368845.5	chr10	126085876	126107505	-	0.909091
ENST00000326971.2	chr6	81208913	81209109	-	ENSG00000164611.8	ENST00000393964.1	chr5	159848917	159855746	+	0.822335
ENST00000426912.1	chr2	51056580	51056816	-	ENSG00000089063.10	ENST00000379286.2	chr20	5080486	5093688	-	0.987342
ENST00000439215.1	chr1	43368903	43369583	+	ENSG00000131100.8	ENST00000253413.5	chr22	18074902	18111584	-	0.947137
ENST00000422309.1	chr17	16757249	16757623	+	ENSG00000103187.4	ENST00000262428.4	chr16	84599200	84651683	-	0.869333
ENST00000438586.1	chrX	52518793	52519069	-	ENSG00000086589.7	ENST00000199814.4	chr5	150070356	150080669	-	0.823105
ENST00000443168.1	chr1	120138790	120139802	-	ENSG00000111640.8	ENST00000229239.5	chr12	6643093	6647537	+	0.82231
ENST00000533906.1	chr11	82920441	82920676	+	ENSG00000173207.7	ENST00000368439.1	chr1	154947129	154951724	+	0.966102
ENST00000510009.1	chr5	17525344	17525938	+	ENSG00000064995.12	ENST00000361288.4	chr6	34845555	34855866	-	0.707563
ENST00000453379.1	chr1	233971826	233972178	-	ENSG00000143727.10	ENST00000272065.5	chr2	264872	278283	+	0.951841
ENST00000405326.1	chr6	7938663	7939555	-	ENSG00000154639.14	ENST00000284878.7	chr21	18884700	18942418	+	0.732363
ENST00000426641.2	chr12	9794398	9795603	+	ENSG00000125166.6	ENST00000245206.4	chr16	58741035	58768184	-	0.921227
ENST00000420325.1	chr13	38567222	38568857	-	ENSG00000144381.10	ENST00000388968.3	chr2	198351305	198364771	-	0.893643
ENST00000473622.1	chr3	154369445	154370212	-	ENSG00000008282.3	ENST00000455385.2	chr7	105730949	105752777	-	0.772135
ENST00000438210.1	chr1	40428352	40429076	+	ENSG00000140988.8	ENST00000343262.3	chr16	2012062	2014861	-	0.955862
ENST00000460178.1	chr5	180372756	180372907	+	ENSG00000213741.3	ENST00000245458.6	chr14	50050290	50053094	-	0.901316
ENST00000482972.1	chr11	56124804	56125697	+	ENSG00000122406.6	ENST00000370321.2	chr1	93297615	93307481	+	0.931767
ENST00000493762.1	chr3	169649786	169651017	+	ENSG00000116199.7	ENST00000263733.4	chr1	178995031	179045697	+	0.893669
ENST00000332361.5	chr9	6639139	6639604	+	ENSG00000198242.7	ENST00000422514.2	chr17	27046411	27051377	+	0.959227
ENST00000404962.1	chr6	49045349	49045688	-	ENSG00000104643.5	ENST00000221086.3	chr8	11141925	11185646	+	0.95
ENST00000396055.2	chrX	70077013	70077352	+	ENSG00000120860.6	ENST00000240079.6	chr12	102406717	102455902	-	0.879412
ENST00000422551.1	chr1	52446145	52446486	+	ENSG00000197728.4	ENST00000356464.4	chr12	56435686	56438005	+	0.929825
ENST00000521887.1	chr8	33084366	33084665	-	ENSG00000023318.7	ENST00000262455.6	chr9	102741461	102861322	-	0.926667
ENST00000441585.1	chr2	22411208	22413185	+	ENSG00000135679.15	ENST00000544561.1	chr12	69202992	69233571	+	0.0915066
ENST00000455473.1	chr2	54307111	54307417	-	ENSG00000197728.4	ENST00000356464.4	chr12	56435686	56438005	+	0.830619
ENST00000437876.1	chr2	11242268	11243123	+	ENSG00000089009.8	ENST00000424576.1	chr12	112842997	112847443	-	0.917056
ENST00000464421.2	chr3	89096592	89097584	-	ENSG00000111640.8	ENST00000396861.1	chr12	6643700	6647525	+	0.794562
ENST00000414503.1	chr21	11180920	11181815	-	ENSG00000175390.7	ENST00000309828.4	chr11	8008867	8017716	+	0.9375
ENST00000446059.1	chr13	107078121	107078470	+	ENSG00000136942.9	ENST00000373570.3	chr9	127620159	127623835	-	0.891429
ENST00000474297.1	chr5	51578401	51578693	+	ENSG00000184779.7	ENST00000330339.7	chr15	82821158	82824972	-	0.764505
ENST00000485217.1	chr8	134014850	134015320	-	ENSG00000122026.6	ENST00000311549.6	chr13	27825446	27830705	+	0.887473
ENST00000414735.1	chr9	77550092	77550728	+	ENSG00000155906.11	ENST00000367303.4	chr6	151725989	151773259	-	0.907378
ENST00000400117.2	chr21	21131673	21132442	-	ENSG00000108561.3	ENST00000225698.3	chr17	5336099	5342471	-	0.851948
ENST00000438179.1	chr10	17619361	17620211	+	ENSG00000134748.11	ENST00000257181.8	chr1	52870236	52883992	+	0.947121
ENST00000459991.1	chr3	99045221	99045396	-	ENSG00000214944.5	ENST00000287898.5	chr5	72921983	73237817	+	0.846591
ENST00000425462.1	chr1	28066465	28067140	+	ENSG00000197713.9	ENST00000359429.6	chr2	210867289	210886300	+	0.889053
ENST00000405549.1	chr6	5066029	5067216	-	ENSG00000162851.6	ENST00000366514.4	chr1	246703862	246729626	-	0.907407
ENST00000510488.1	chr3	141189476	141190744	-	ENSG00000111057.5	ENST00000388835.2	chr12	53342843	53346684	+	0.895981
ENST00000422817.1	chr1	167560629	167561084	+	ENSG00000231500.2	ENST00000439602.2	chr6	33239787	33244287	+	0.846491
ENST00000490532.1	chr19	52152115	52152863	+	ENSG00000147604.9	ENST00000396465.1	chr8	74203277	74206673	-	0.87717
ENST00000401788.1	chr6	27978501	27980122	+	ENSG00000173226.12	ENST00000310864.6	chr3	121488610	121553926	-	0.944513
ENST00000406065.2	chr7	130330095	130330464	-	ENSG00000111780.7	ENST00000229384.4	chr12	120884284	120897762	+	0.862162
ENST00000413677.1	chr1	76047784	76048240	+	ENSG00000162244.5	ENST00000466397.1	chr3	52027644	52029879	-	0.92779
ENST00000398541.2	chr20	55176757	55177169	+	ENSG00000198034.6	ENST00000316084.6	chrX	71491892	71497150	-	0.946731
ENST00000400933.2	chr1	247347115	247348784	-	ENSG00000139197.5	ENST00000266563.5	chr12	7342180	7364079	+	0.891018
ENST00000525856.1	chr11	118193504	118193798	-	ENSG00000135702.9	ENST00000336257.2	chr16	75562430	75569068	-	0.820339
ENST00000457220.1	chr10	20638978	20640029	+	ENSG00000123505.9	ENST00000368885.3	chr6	111195973	111216916	+	0.878525
ENST00000395991.2	chr1	52719293	52719848	+	ENSG00000164162.8	ENST00000507656.1	chr4	145916152	146019353	-	0.942446
ENST00000418508.1	chr2	130253870	130254361	+	ENSG00000196262.8	ENST00000468812.1	chr7	44836279	44842716	+	0.932927
ENST00000419629.1	chrX	40749900	40750790	-	ENSG00000137575.7	ENST00000260130.4	chr8	59465728	59495419	+	0.950617
ENST00000394154.2	chr4	184404643	184405338	+	ENSG00000100568.5	ENST00000216456.5	chr14	68117489	68141339	-	0.945402
ENST00000426799.1	chrX	65041097	65042091	-	ENSG00000163249.5	ENST00000295414.3	chr2	208576410	208620898	+	0.952764
ENST00000515730.1	chr8	87493983	87495231	-	ENSG00000157045.3	ENST00000287706.3	chr16	15131710	15149921	-	0.919149
ENST00000474978.1	chr16	75226363	75227145	-	ENSG00000157828.5	ENST00000288666.5	chrY	22918050	22942918	+	0.886335
ENST00000431142.1	chr2	88272175	88272601	+	ENSG00000239779.2	ENST00000393972.3	chr2	74685527	74688018	+	0.990632
ENST00000453267.1	chr7	47065726	47066168	-	ENSG00000198015.6	ENST00000361630.2	chr12	93861270	93896432	+	0.774266
ENST00000513630.1	chr4	49018699	49019171	-	ENSG00000111669.9	ENST00000229270.4	chr12	6976283	6980112	+	0.921776
ENST00000404337.1	chr6	96438983	96440225	+	ENSG00000111057.5	ENST00000388835.2	chr12	53342843	53346684	+	0.808528
ENST00000414056.1	chr9	20331444	20332275	+	ENSG00000172062.12	ENST00000380707.4	chr5	70220857	70248839	+	0.84976
ENST00000447288.1	chr2	52154020	52154500	-	ENSG00000160799.6	ENST00000425441.1	chr3	46963216	47023472	-	0.829522
ENST00000453058.1	chr9	42493817	42494795	+	ENSG00000151233.5	ENST00000280876.5	chr12	42475650	42538673	-	0.916241
ENST00000435923.1	chr7	84477193	84477569	-	ENSG00000113811.6	ENST00000495461.1	chr3	53918437	53926015	-	0.899204
ENST00000487061.1	chr3	156705906	156706501	-	ENSG00000169372.6	ENST00000542893.1	chr12	94071493	94244524	+	0.870805
ENST00000512058.1	chr5	75371356	75371745	+	ENSG00000150459.6	ENST00000382533.4	chr13	21714653	21723221	+	0.815385
ENST00000440037.1	chrX	86143589	86143819	+	ENSG00000147604.9	ENST00000396465.1	chr8	74203277	74206673	-	0.891775
ENST00000469329.1	chr17	65780869	65781409	+	ENSG00000215472.3	ENST00000418495.1	chr18	47014858	47018906	-	0.933457
ENST00000464002.1	chr4	189027712	189028068	+	ENSG00000149806.6	ENST00000529639.1	chr11	64888100	64889945	-	0.862745
ENST00000421633.1	chr7	55410009	55412651	+	ENSG00000079313.5	ENST00000170168.3	chr19	1815245	1848452	-	0.813848
ENST00000432327.1	chr10	89136653	89138238	+	ENSG00000185823.2	ENST00000329468.2	chr15	24920541	24928593	+	0.735183
ENST00000441166.1	chr1	98240225	98240582	+	ENSG00000172262.6	ENST00000509634.1	chr5	43121700	43176349	+	0.874302
ENST00000465687.1	chr3	88366306	88368172	+	ENSG00000033050.3	ENST00000287844.2	chr7	150909576	150924316	-	0.937868
ENST00000514359.1	chr4	16309079	16309790	+	ENSG00000137440.3	ENST00000382333.1	chr4	15937192	15940363	-	0.674157
ENST00000479066.1	chr8	134338240	134338647	+	ENSG00000144713.8	ENST00000429711.2	chr3	12875984	12883087	-	0.911765
ENST00000426656.1	chr10	135455590	135456398	+	ENSG00000164252.8	ENST00000312916.7	chr5	76326210	76361059	+	0.881335
ENST00000431907.2	chr12	121352203	121352926	+	ENSG00000213719.4	ENST00000375779.2	chr6	31698358	31704349	-	0.906077
ENST00000401776.1	chr6	56141327	56141594	-	ENSG00000228716.2	ENST00000504396.1	chr5	79924042	79950377	-	0.94403
ENST00000446451.2	chr7	130524963	130528484	-	ENSG00000172262.6	ENST00000509634.1	chr5	43121700	43176349	+	0.903076
ENST00000478069.1	chr4	95290984	95291314	+	ENSG00000182899.10	ENST00000464167.1	chr3	197676858	197683481	+	0.912387
ENST00000517662.1	chr8	75515479	75516479	-	ENSG00000197111.6	ENST00000359462.4	chr12	53845886	53874945	+	0.967033
ENST00000496450.1	chr11	27505397	27505675	+	ENSG00000197756.4	ENST00000491306.1	chr2	217362912	217368274	+	0.924731
ENST00000421321.1	chrX	52245867	52246128	-	ENSG00000086589.7	ENST00000199814.4	chr5	150070356	150080669	-	0.824427
ENST00000431339.1	chrX	73325407	73327793	+	ENSG00000147854.11	ENST00000276893.5	chr9	6413323	6507054	+	0.934646
ENST00000401022.2	chr1	104615632	104616159	+	ENSG00000041988.10	ENST00000054650.4	chr1	6684926	6693625	+	0.956439
ENST00000462935.1	chr18	49371375	49372000	-	ENSG00000142937.7	ENST00000396651.3	chr1	45241109	45244451	+	0.892971
ENST00000418991.1	chrX	118320405	118320792	-	ENSG00000162980.11	ENST00000295087.8	chr2	152655316	152685002	-	0.896907
ENST00000415328.1	chr3	57516072	57516694	-	ENSG00000142937.7	ENST00000396651.3	chr1	45241109	45244451	+	0.873194
ENST00000450068.1	chr10	9763926	9766379	-	ENSG00000096384.13	ENST00000353801.3	chr6	44214824	44221620	+	0.735534
ENST00000487417.1	chr12	62415351	62415955	-	ENSG00000149273.8	ENST00000531188.1	chr11	75110530	75117957	+	0.935537
ENST00000450956.1	chr9	78339138	78339488	-	ENSG00000165588.10	ENST00000339475.4	chr14	57267426	57277187	-	0.817664
ENST00000415020.1	chr2	113690202	113690748	+	ENSG00000132964.6	ENST00000381527.3	chr13	26828276	26979375	+	0.925046
ENST00000491826.1	chr4	54852751	54853225	-	ENSG00000122026.6	ENST00000311549.6	chr13	27825446	27830705	+	0.930526
ENST00000421150.1	chr7	53255081	53256631	+	ENSG00000147874.6	ENST00000380502.3	chr9	19053141	19103117	-	0.989039
ENST00000403648.1	chr6	83634746	83634841	-	ENSG00000002549.7	ENST00000226299.4	chr4	17578815	17609591	+	0.84375
ENST00000398220.2	chr6	27932953	27933292	+	ENSG00000177600.4	ENST00000321153.4	chr11	809647	812875	+	0.820588
ENST00000452663.1	chr7	18988521	18989385	-	ENSG00000181163.9	ENST00000296930.5	chr5	170814652	170838141	+	0.873988
ENST00000540175.1	chr12	20704524	20705946	+	ENSG00000034063.7	ENST00000396708.3	chr19	4909510	4961182	+	0.969782
ENST00000441256.1	chr7	12962170	12962545	-	ENSG00000134597.8	ENST00000305536.6	chrX	129535943	129547317	+	0.702128
ENST00000442987.2	chr1	131104	133923	+	ENSG00000079432.1	ENST00000160740.1	chr19	42788817	42799949	+	0.833333
ENST00000474387.1	chr3	78808124	78808524	+	ENSG00000112306.7	ENST00000230050.3	chr6	133135580	133138703	+	0.80798
ENST00000448218.1	chrX	97161642	97163076	+	ENSG00000061676.8	ENST00000360982.2	chr2	183789605	183903586	-	0.887108
ENST00000433754.1	chr7	131771025	131772751	+	ENSG00000126746.12	ENST00000319770.3	chr12	6775643	6798527	-	0.772472
ENST00000439908.1	chrX	18883889	18884672	+	ENSG00000152240.4	ENST00000282058.4	chr18	43684298	43708299	+	0.955357
ENST00000419324.1	chr21	40588550	40589432	+	ENSG00000100575.7	ENST00000395159.1	chr14	58875214	58894232	-	0.887218
ENST00000429582.2	chr6	57686969	57687949	-	ENSG00000111640.8	ENST00000229239.5	chr12	6643093	6647537	+	0.829766
ENST00000368528.3	chr3	27674467	27675211	+	ENSG00000167460.8	ENST00000300933.3	chr19	16187135	16213813	+	0.966443
ENST00000400856.2	chr10	116569134	116570929	+	ENSG00000187325.4	ENST00000341864.5	chrX	77385245	77395203	-	0.783567
ENST00000430315.1	chr9	93931863	93932327	-	ENSG00000196262.8	ENST00000468812.1	chr7	44836279	44842716	+	0.873118
ENST00000425843.1	chrX	120337036	120338868	-	ENSG00000109971.8	ENST00000534624.1	chr11	122928197	122933043	-	0.942171
ENST00000506031.1	chr4	131424521	131425499	-	ENSG00000111640.8	ENST00000229239.5	chr12	6643093	6647537	+	0.772217
ENST00000483119.2	chr8	11113529	11114111	+	ENSG00000108298.4	ENST00000225430.4	chr17	37356536	37360980	+	0.895369
ENST00000413888.1	chr9	7477045	7478320	-	ENSG00000174444.7	ENST00000307961.5	chr15	66790801	66797221	-	0.965517
ENST00000439651.1	chrY	3734347	3734763	-	ENSG00000244687.3	ENST00000340309.3	chr20	48697661	48732491	-	0.928058
ENST00000528788.1	chr8	7554352	7554615	-	ENSG00000149823.3	ENST00000279281.3	chr11	64863631	64879332	+	0.920455
ENST00000460917.1	chr3	180545765	180547638	-	ENSG00000059122.11	ENST00000399667.2	chr16	2961980	3001208	+	0.899146
ENST00000393668.3	chr11	71991195	71992222	+	ENSG00000161265.6	ENST00000412391.2	chr19	36233433	36236306	-	0.689607
ENST00000404237.1	chr6	112646955	112647951	-	ENSG00000254093.2	ENST00000314787.3	chr8	10622473	10697386	-	0.839519
ENST00000430261.1	chrX	44325937	44328201	+	ENSG00000118900.7	ENST00000396658.2	chr16	4902216	4932361	+	0.754621
ENST00000535964.1	chr12	18577597	18578074	+	ENSG00000110429.8	ENST00000532057.1	chr11	33763285	33774945	-	0.851464
ENST00000444401.1	chrX	15135563	15135890	-	ENSG00000182899.10	ENST00000464167.1	chr3	197676858	197683481	+	0.884146
ENST00000411737.1	chr2	92047410	92047503	+	ENSG00000145354.4	ENST00000273986.4	chr4	103790135	103810399	+	0.946809
ENST00000431784.1	chr9	75060665	75060868	-	ENSG00000075785.8	ENST00000464496.1	chr3	128514086	128526437	+	0.705882
ENST00000464118.1	chr19	30447319	30447895	-	ENSG00000163682.10	ENST00000449470.2	chr4	39455757	39460508	-	0.960139
ENST00000498256.1	chr8	29489607	29490160	+	ENSG00000215472.3	ENST00000441578.1	chr18	47014858	47018906	-	0.944043
ENST00000416267.1	chrX	122648324	122648723	+	ENSG00000132475.3	ENST00000254810.3	chr17	73772517	73775860	-	0.7775
ENST00000431448.1	chr2	26382892	26384005	+	ENSG00000149196.10	ENST00000533986.1	chr11	86013253	86056680	+	0.81106
ENST00000450381.1	chr1	89389053	89389527	+	ENSG00000171984.9	ENST00000303142.6	chr20	5731043	5844558	+	0.84
ENST00000422816.1	chr17	47501631	47502284	-	ENSG00000151247.8	ENST00000450253.2	chr4	99792835	99851788	-	0.993884
ENST00000442911.1	chr6	108693976	108694131	-	ENSG00000175768.8	ENST00000321301.6	chr9	37588410	37592639	-	0.846154
ENST00000399891.2	chr2	42759906	42760582	-	ENSG00000122026.6	ENST00000311549.6	chr13	27825446	27830705	+	0.920844
ENST00000423267.1	chr2	128688901	128689014	+	ENSG00000196704.6	ENST00000359904.2	chr17	66244145	66253305	+	0.885965
ENST00000523974.1	chr8	143049452	143050202	-	ENSG00000126698.5	ENST00000263697.4	chr1	28527068	28559536	-	0.906791
ENST00000419271.1	chr7	63353664	63355019	+	ENSG00000154727.6	ENST00000354828.3	chr21	27106881	27144771	+	0.991888
ENST00000536978.1	chr12	127100890	127101100	-	ENSG00000250683.1	ENST00000257452.4	chr9	79002315	79009108	-	0.800948
ENST00000498753.1	chr3	141762465	141763040	-	ENSG00000108298.4	ENST00000225430.4	chr17	37356536	37360980	+	0.939236
ENST00000488676.1	chr1	174059269	174059610	-	ENSG00000156482.6	ENST00000521726.1	chr8	99054035	99058697	-	0.833333
ENST00000448152.2	chr21	16146622	16147583	+	ENSG00000111640.8	ENST00000229239.5	chr12	6643093	6647537	+	0.72869
ENST00000428836.1	chr1	50156941	50157196	-	ENSG00000142534.1	ENST00000270625.1	chr19	49999634	50002944	+	0.808594
ENST00000486033.1	chr1	111396560	111397513	+	ENSG00000204694.6	ENST00000377147.2	chr6	29393281	29395509	-	0.680294
ENST00000429775.1	chrX	70182814	70183140	+	ENSG00000186468.8	ENST00000296674.8	chr5	81569177	81574396	-	0.990826
ENST00000446155.1	chr1	45996599	45997811	+	ENSG00000189403.9	ENST00000405805.1	chr13	31032884	31191734	-	0.88796
ENST00000469924.1	chr19	17700404	17700880	-	ENSG00000122026.6	ENST00000311549.6	chr13	27825446	27830705	+	0.932914
ENST00000405812.1	chr6	146686058	146686564	-	ENSG00000101911.7	ENST00000489404.1	chrX	12809607	12828488	+	0.666667
ENST00000454211.1	chr3	6734006	6734775	+	ENSG00000134308.8	ENST00000381844.4	chr2	9724101	9770745	-	0.81713
ENST00000511612.1	chr5	97361669	97361843	+	ENSG00000086475.9	ENST00000327347.5	chr10	13359424	13390297	-	0.965714
ENST00000413059.1	chrX	57419079	57421842	-	ENSG00000100714.8	ENST00000216605.7	chr14	64854958	64926721	+	0.944645
ENST00000512083.1	chr4	84158456	84158597	+	ENSG00000133112.12	ENST00000530705.1	chr13	45911313	45915505	-	0.838028
ENST00000514761.1	chr5	83170985	83171640	-	ENSG00000188372.9	ENST00000416245.1	chr7	76057955	76071379	+	0.745427
ENST00000482002.1	chr7	28318830	28319319	-	ENSG00000196262.8	ENST00000468812.1	chr7	44836279	44842716	+	0.920408
ENST00000443139.1	chr9	115043258	115043692	-	ENSG00000115541.6	ENST00000233893.5	chr2	198364718	198368181	+	0.840278
ENST00000425362.1	chr4	164303331	164303668	+	ENSG00000182899.10	ENST00000448864.1	chr3	197677065	197682722	+	0.813609
ENST00000545814.1	chr12	64045407	64045710	+	ENSG00000163191.5	ENST00000271638.2	chr1	152004982	152009511	-	0.907895
ENST00000436704.1	chr9	35874807	35875191	-	ENSG00000128609.9	ENST00000355749.2	chr7	123181083	123198309	-	0.854545
ENST00000451824.1	chr7	23760930	23761401	-	ENSG00000168300.9	ENST00000360540.5	chr8	52730140	52811658	-	0.940678
ENST00000450912.1	chr9	29254054	29254423	-	ENSG00000100138.9	ENST00000401959.1	chr22	42069971	42084885	-	0.721622
ENST00000445367.1	chr1	234162597	234162973	-	ENSG00000136238.13	ENST00000348035.4	chr7	6414154	6443608	+	0.854111
ENST00000366255.3	chr12	31617996	31618776	+	ENSG00000166337.5	ENST00000299424.4	chr11	6632073	6633898	-	0.62356
ENST00000510421.1	chr5	24786958	24787133	-	ENSG00000137707.9	ENST00000356018.2	chr11	111338251	111383079	-	0.852273
ENST00000436372.1	chrX	70534762	70535729	-	ENSG00000139168.2	ENST00000266529.2	chr12	42705888	42719932	-	0.967187
ENST00000425261.1	chr7	30782047	30782434	-	ENSG00000241644.2	ENST00000013222.5	chr7	30791751	30797218	+	0.822165
ENST00000402374.1	chr6	87883086	87884021	-	ENSG00000105849.5	ENST00000222567.5	chr7	19735085	19748710	-	0.834402
ENST00000416785.1	chr6	28699794	28700681	+	ENSG00000168028.8	ENST00000301821.5	chr3	39448180	39453929	+	0.916667
ENST00000491662.1	chr8	98877282	98877713	+	ENSG00000186468.8	ENST00000296674.8	chr5	81569177	81574396	-	0.914352
ENST00000508392.1	chr5	133056186	133056625	-	ENSG00000170946.10	ENST00000536040.1	chr11	31391404	31449511	+	0.827273
ENST00000454907.1	chr6	167114582	167116327	-	ENSG00000136231.8	ENST00000258729.3	chr7	23349828	23510086	-	0.959336
ENST00000397595.2	chr22	31551952	31552633	-	ENSG00000128739.14	ENST00000444203.2	chr15	25218866	25223721	+	0.903226
ENST00000449607.1	chrX	27911465	27912176	-	ENSG00000085840.7	ENST00000371566.1	chr1	52838503	52870059	-	0.771067
ENST00000426405.1	chrX	73629353	73629935	+	ENSG00000171863.8	ENST00000304921.5	chr2	3622795	3628509	+	0.945111
ENST00000491764.1	chr1	171361368	171361944	+	ENSG00000196743.4	ENST00000357164.3	chr5	150632453	150650001	+	0.833622
ENST00000438914.1	chr20	39959763	39960300	+	ENSG00000182551.7	ENST00000327435.4	chr2	3501693	3523507	-	0.795539
ENST00000420014.1	chr1	227451900	227452908	-	ENSG00000081307.8	ENST00000264991.4	chr3	132373290	132396941	+	0.924678
ENST00000419313.1	chr13	21181407	21182270	+	ENSG00000141979.3	ENST00000409035.1	chr19	16589878	16739015	-	0.719907
ENST00000433704.1	chr13	31127807	31128830	+	ENSG00000175354.11	ENST00000309660.3	chr18	12793300	12884198	-	0.947266
ENST00000453073.1	chr2	195052103	195053033	+	ENSG00000135486.10	ENST00000340913.5	chr12	54674488	54679028	+	0.920516
ENST00000534767.1	chr11	43919006	43921186	+	ENSG00000129657.6	ENST00000436233.1	chr17	75137005	75213183	+	0.92343
ENST00000493631.1	chr3	125029725	125030194	+	ENSG00000128951.6	ENST00000331200.2	chr15	48623621	48635570	+	0.82766
ENST00000424567.1	chr1	42965876	42966010	-	ENSG00000205542.6	ENST00000380636.1	chrX	12993229	12995345	+	0.985185
ENST00000506854.1	chr5	129865112	129865582	+	ENSG00000102931.2	ENST00000219204.2	chr16	57279010	57287547	+	0.866242
ENST00000515577.1	chr5	126478774	126478939	-	ENSG00000144029.7	ENST00000272418.2	chr2	95752952	95787745	-	0.909639
ENST00000426334.1	chrX	130475421	130476426	-	ENSG00000198657.3	ENST00000356130.3	chr11	124293807	124294789	-	0.560636
ENST00000412545.1	chr3	186617987	186618346	+	ENSG00000008988.5	ENST00000523936.1	chr8	56985632	56986915	-	0.972222
ENST00000512823.1	chr4	160296251	160296474	-	ENSG00000171798.12	ENST00000304613.3	chr10	134973951	135039916	+	0.651786
ENST00000491096.1	chr3	154394377	154394908	-	ENSG00000163682.10	ENST00000449470.2	chr4	39455757	39460508	-	0.815789
ENST00000477943.1	chr14	70352057	70352857	-	ENSG00000148303.12	ENST00000323345.6	chr9	136215069	136218281	+	0.985019
ENST00000421144.1	chr1	248102547	248102961	+	ENSG00000177275.3	ENST00000318244.3	chr1	248097071	248098057	+	0.749398
ENST00000437925.1	chr9	89699076	89700066	-	ENSG00000066136.13	ENST00000372652.1	chr1	41175029	41237275	+	0.925328
ENST00000454836.1	chr2	159731154	159732182	+	ENSG00000237521.1	ENST00000456448.1	chr19	9361606	9362820	+	0.829932
ENST00000491037.1	chr13	99842833	99843245	-	ENSG00000111640.8	ENST00000450282.2	chr12	6643686	6647536	+	0.835351
ENST00000449146.1	chr13	59645596	59645937	-	ENSG00000161980.5	ENST00000293860.5	chr16	96407	103628	-	0.760234
ENST00000401481.1	chr6	25218916	25221299	+	ENSG00000106546.8	ENST00000242057.4	chr7	17338246	17385774	+	0.737037
ENST00000528257.1	chr11	107606735	107609444	-	ENSG00000162627.12	ENST00000306121.3	chr1	99127279	99226056	+	0.921201
ENST00000412845.1	chr1	117282603	117285231	-	ENSG00000100285.8	ENST00000328842.5	chr22	29876181	29886692	+	0.876379
ENST00000402643.2	chr6	166477779	166478788	+	ENSG00000111640.8	ENST00000229239.5	chr12	6643093	6647537	+	0.916832
ENST00000443728.1	chrX	12413876	12414286	-	ENSG00000215472.3	ENST00000418495.1	chr18	47014858	47018906	-	0.824818
ENST00000445734.1	chrX	38254622	38255148	-	ENSG00000241186.2	ENST00000296145.5	chr3	46618727	46623953	+	0.829222
ENST00000426409.1	chr13	94047181	94048108	-	ENSG00000135486.10	ENST00000330752.6	chr12	54674488	54679028	+	0.856681
ENST00000432393.1	chr2	208921972	208922469	-	ENSG00000197958.8	ENST00000361436.5	chr9	130209953	130213684	-	0.929719
ENST00000414123.1	chr10	64981915	64982805	+	ENSG00000147687.11	ENST00000276692.6	chr8	125500749	125551325	-	0.971942
ENST00000456468.1	chr3	37831412	37831936	-	ENSG00000123545.5	ENST00000316149.7	chr6	97337189	97345757	-	0.910476
ENST00000474487.1	chr3	75707685	75708165	+	ENSG00000106538.5	ENST00000466675.1	chr7	150035447	150038732	-	0.841996
ENST00000440565.1	chr7	62865220	62865778	-	ENSG00000078061.7	ENST00000377045.4	chrX	47420516	47431299	+	0.826476
ENST00000456007.1	chr2	33281400	33288180	-	ENSG00000184260.4	ENST00000331380.2	chr1	149858525	149858961	+	0.825581
ENST00000447844.1	chr21	28792699	28793342	-	ENSG00000147403.12	ENST00000344746.4	chrX	153626713	153630680	+	0.940994
ENST00000402231.1	chrX	49676227	49676969	-	ENSG00000071894.8	ENST00000349769.3	chr8	145618450	145634753	-	0.746972
ENST00000544968.1	chr12	32005955	32006341	-	ENSG00000134717.13	ENST00000484036.1	chr1	52521993	52552282	+	0.72093
ENST00000530288.1	chr8	7095808	7096153	-	ENSG00000149823.3	ENST00000279281.3	chr11	64863631	64879332	+	0.921965
ENST00000495480.1	chr18	20166428	20167190	+	ENSG00000198034.6	ENST00000316084.6	chrX	71491892	71497150	-	0.8519
ENST00000492269.1	chr3	147308783	147309622	-	ENSG00000181163.9	ENST00000296930.5	chr5	170814652	170838141	+	0.864286
ENST00000427062.1	chr10	27667067	27667291	-	ENSG00000170855.2	ENST00000302432.2	chr12	120882359	120884175	-	0.773333
ENST00000420390.1	chr3	33231725	33231820	-	ENSG00000172115.4	ENST00000305786.2	chr7	25159710	25164980	-	0.90625
ENST00000416709.1	chr6	168687585	168690030	-	ENSG00000212710.2	ENST00000391403.2	chr18	19993573	19997878	-	0.907604
ENST00000529105.1	chr11	49092304	49092552	-	ENSG00000141446.5	ENST00000383276.1	chr18	19109264	19180845	-	0.955823
ENST00000418361.1	chr13	40391880	40392186	-	ENSG00000237190.3	ENST00000458198.2	chr5	133737778	133747589	-	0.785016
ENST00000441847.1	chr3	42382080	42383859	+	ENSG00000063046.11	ENST00000262056.8	chr12	53400062	53435992	+	0.842697
ENST00000428093.1	chr2	68352397	68352879	+	ENSG00000196262.8	ENST00000468812.1	chr7	44836279	44842716	+	0.931677
ENST00000498068.1	chr4	174340396	174341288	-	ENSG00000122406.6	ENST00000432788.1	chr1	93297597	93307480	+	0.901456
ENST00000475267.1	chrX	50648438	50648866	+	ENSG00000132475.3	ENST00000254810.3	chr17	73772517	73775860	-	0.762238
ENST00000438230.1	chr22	46188298	46189516	-	ENSG00000072756.12	ENST00000251607.6	chr3	3168600	3190707	+	0.839212
ENST00000475925.1	chr4	96566103	96566444	-	ENSG00000156482.6	ENST00000521291.1	chr8	99053949	99057742	-	0.804094
ENST00000451325.1	chr10	5346394	5346828	-	ENSG00000161970.7	ENST00000293842.4	chr17	8280838	8286568	-	0.885057
ENST00000417777.1	chr3	46352082	46353413	-	ENSG00000140740.5	ENST00000268379.4	chr16	21963981	21994981	+	0.835586
ENST00000532111.1	chr8	12231875	12233055	-	ENSG00000231396.1	ENST00000417945.1	chr4	9212383	9213975	+	0.944962
ENST00000431872.1	chr9	68357280	68358558	-	ENSG00000167306.11	ENST00000285039.6	chr18	47349156	47721451	-	0.938233
ENST00000430515.1	chr3	194476318	194478151	+	ENSG00000162391.5	ENST00000302250.2	chr1	55074855	55089229	-	0.85169
ENST00000506833.1	chr8	15182805	15183078	+	ENSG00000070501.6	ENST00000518925.1	chr8	42196000	42226815	+	0.748175
ENST00000504623.1	chr4	128419482	128419962	+	ENSG00000130066.11	ENST00000379270.4	chrX	23801290	23804343	+	0.831601
ENST00000442570.1	chrX	97230880	97233640	-	ENSG00000108424.4	ENST00000290158.3	chr17	45727275	45760998	+	0.775918
ENST00000437976.1	chr20	34438596	34438837	-	ENSG00000131174.4	ENST00000481445.1	chrX	77154935	77162870	+	0.88843
ENST00000503102.1	chr5	149311577	149312231	-	ENSG00000168958.15	ENST00000353339.3	chr2	228189955	228222549	+	0.957252
[truncated: 5,807 more rows]
