# Supplementary material for: Analysis of variable retroduplications in human populations suggests coupling of retrotransposition to cell division
Source: HighWire-hosted journal article supplement (doi:10.1101/gr.154625.113), 2013-09-11
Supplement: Supplemental_TableS9.xlsx [file Supplemental_TableS9.xlsx]

## Sheet: Primers Used
CEU Trio genes	Primer A	Primer B	Insertion Point Primer C	Insertion Point Primer D
CDC27	ATTGTGTCCTGGGGTGTTTC	ACCGCTCAGGAAAGGCATA
BCLAF1	CCTAGAGTGCCTTCTATTCCAG	CTTCACTTGACTTCTTGATCCTG
LAPTM4B	GTCGACGCTCCTGAAAACTT	GCTCCGTAAGTAGCCATAGCA
MTCH2	GCCCTCCTTACTCCCCAATA	AAAGGCAGACACCAAACACC
CBX3	TGTAGTGAATGGGAAAGTGGAA	CACCAAGTCTGCCTCATCTG	AGCAAAAGCCAGGAAGAACA	TATTCCCAGGTTTGGCTTTG
TMEM66	TTCTTAGGGCATCACAGGTTTT	CAAACTCAGACACGAAAACCAG
TDG	CAACCAGTGGAACCCAAAAA	CGGTTCACACTACCACACAA	GCATCAGGGATTAGGAGCAA	GGGGACACAGGTGGTCTTAG
BOD1	CAGTGACGACCTTGGCCTAT	ATCTGGACAAGCAGGAATGG
CACNA1B	CGGGTCCTCTACAAGCAATC	CCCAGAGCGATGATTTTGAT	CAGAAAGATTGGCCTTGTCC	CTCTGGGCTTTGTCTTCCAC
SKA3	CCCCACCTACCAAACAATCA	GCAGGGCAATGTGAATGTTA	CTCTGCCTTCCCATCATCTC	CCACCACCTATCACCATTCTG
AP3S1	TGAGCTGGATTTGATTTTCCA	CACTGAGCAAGAACAGCAACA
AC131157.1	excluded from analysis
AL590623.1	excluded from analysis
